# Supplementary material for: Using a smartwatch and smartphone to assess early Parkinson’s disease in the WATCH-PD study over 12 months
Source: PubMed Central journal article supplement (PMC11169239; doi:10.1038/s41531-024-00721-2), 2024-06-12
Supplement: 41531_2024_721_MOESM1_ESM.pdf [file 41531_2024_721_MOESM1_ESM.pdf]

Supplementary Table 1: Test-Retest Reliability Comparison of Data Collected via from smartphone/smartwatch/research-grade accelerometer at Baseline and 1st clinic visit, and pairwise at home (1st vs 2nd, 2nd vs 3rd, 3rd vs 4th when available). ICC, Intraclass Correlation Coefficient; CI, Confidence Interval. MDS-UPDRS, the Movement Disorder Society-Sponsored Revision of the Unified Parkinson's Disease Rating Scale. SDMT, Symbol-Digit Modalities Test. VSWM, Visuospatial Working Memory Task. L, Left. R, Right. GCT, Gait Cycle Time.

| Feature                                            | Domain               | Task               | Device          | Location | Pair                           | n   | ICC   | 95% CI       | Spearman r |
|----------------------------------------------------|----------------------|--------------------|-----------------|----------|--------------------------------|-----|-------|--------------|------------|
| Finemotor dominant hand                            | Cognitive/Pschomotor | Finemotor          | Smartphone      | clinic   | Baseline vs. 1st clinic visit  | 115 | 0.63  | (0.5 0.73)   | 0.53       |
| Finemotor dominant hand                            | Cognitive/Pschomotor | Finemotor          | Smartphone      | home     | 1st vs 2nd at-home measurement | 123 | 0.62  | (0.49 0.72)  | 0.6        |
| Finemotor dominant hand                            | Cognitive/Pschomotor | Finemotor          | Smartphone      | home     | 2nd vs 3rd at-home measurement | 120 | 0.6   | (0.48 0.71)  | 0.59       |
| Finemotor dominant hand                            | Cognitive/Pschomotor | Finemotor          | Smartphone      | home     | 3rd vs 4th at-home measurement | 118 | 0.63  | (0.5 0.72)   | 0.62       |
| Finemotor nondominant hand                         | Cognitive/Pschomotor | Finemotor          | Smartphone      | clinic   | Baseline vs. 1st clinic visit  | 115 | 0.63  | (0.51 0.73)  | 0.58       |
| Finemotor nondominant hand                         | Cognitive/Pschomotor | Finemotor          | Smartphone      | home     | 1st vs 2nd at-home measurement | 123 | 0.64  | (0.52 0.73)  | 0.63       |
| Finemotor nondominant hand                         | Cognitive/Pschomotor | Finemotor          | Smartphone      | home     | 2nd vs 3rd at-home measurement | 120 | 0.62  | (0.49 0.72)  | 0.6        |
| Finemotor nondominant hand                         | Cognitive/Pschomotor | Finemotor          | Smartphone      | home     | 3rd vs 4th at-home measurement | 118 | 0.7   | (0.59 0.78)  | 0.67       |
| Fingertapping dominant hand                        | Cognitive/Pschomotor | Fingertapping      | Smartphone      | clinic   | Baseline vs. 1st clinic visit  | 120 | 0.67  | (0.56 0.76)  | 0.75       |
| Fingertapping dominant hand                        | Cognitive/Pschomotor | Fingertapping      | Smartphone      | home     | 1st vs 2nd at-home measurement | 123 | 0.8   | (0.73 0.86)  | 0.81       |
| Fingertapping dominant hand                        | Cognitive/Pschomotor | Fingertapping      | Smartphone      | home     | 2nd vs 3rd at-home measurement | 121 | 0.85  | (0.79 0.89)  | 0.85       |
| Fingertapping dominant hand                        | Cognitive/Pschomotor | Fingertapping      | Smartphone      | home     | 3rd vs 4th at-home measurement | 120 | 0.95  | (0.92 0.96)  | 0.95       |
| Fingertapping nondominant hand                     | Cognitive/Pschomotor | Fingertapping      | Smartphone      | clinic   | Baseline vs. 1st clinic visit  | 120 | 0.69  | (0.58 0.77)  | 0.83       |
| Fingertapping nondominant hand                     | Cognitive/Pschomotor | Fingertapping      | Smartphone      | home     | 1st vs 2nd at-home measurement | 123 | 0.76  | (0.67 0.82)  | 0.81       |
| Fingertapping nondominant hand                     | Cognitive/Pschomotor | Fingertapping      | Smartphone      | home     | 2nd vs 3rd at-home measurement | 121 | 0.86  | (0.81 0.9 )  | 0.89       |
| Fingertapping nondominant hand                     | Cognitive/Pschomotor | Fingertapping      | Smartphone      | home     | 3rd vs 4th at-home measurement | 120 | 0.92  | (0.89 0.94)  | 0.92       |
| Intertap intervals (ms) dominant hand              | Cognitive/Pschomotor | Intertap intervals | Smartphone      | clinic   | Baseline vs. 1st clinic visit  | 115 | 0.24  | (0.06 0.41)  | 0.49       |
| Intertap intervals (ms) dominant hand              | Cognitive/Pschomotor | Intertap intervals | Smartphone      | home     | 1st vs 2nd at-home measurement | 123 | 0.47  | (0.32 0.6 )  | 0.5        |
| Intertap intervals (ms) dominant hand              | Cognitive/Pschomotor | Intertap intervals | Smartphone      | home     | 2nd vs 3rd at-home measurement | 121 | 0.65  | (0.54 0.74)  | 0.64       |
| Intertap intervals (ms) dominant hand              | Cognitive/Pschomotor | Intertap intervals | Smartphone      | home     | 3rd vs 4th at-home measurement | 119 | 0.54  | (0.4 0.66)   | 0.49       |
| Intertap intervals (ms) nondominant hand           | Cognitive/Pschomotor | Intertap intervals | Smartphone      | clinic   | Baseline vs. 1st clinic visit  | 116 | 0.28  | (0.1 0.44)   | 0.43       |
| Intertap intervals (ms) nondominant hand           | Cognitive/Pschomotor | Intertap intervals | Smartphone      | home     | 1st vs 2nd at-home measurement | 123 | 0.51  | (0.36 0.63)  | 0.53       |
| Intertap intervals (ms) nondominant hand           | Cognitive/Pschomotor | Intertap intervals | Smartphone      | home     | 2nd vs 3rd at-home measurement | 121 | 0.32  | (0.15 0.47)  | 0.28       |
| Intertap intervals (ms) nondominant hand           | Cognitive/Pschomotor | Intertap intervals | Smartphone      | home     | 3rd vs 4th at-home measurement | 120 | 0.58  | (0.45 0.69)  | 0.47       |
| Percentage total correct from SDMT                 | Cognitive/Pschomotor | SDMT               | Smartphone      | clinic   | Baseline vs. 1st clinic visit  | 119 | 0.44  | (0.28 0.57)  | 0.49       |
| Percentage total correct from SDMT                 | Cognitive/Pschomotor | SDMT               | Smartphone      | home     | 1st vs 2nd at-home measurement | 126 | 0.57  | (0.44 0.67)  | 0.57       |
| Percentage total correct from SDMT                 | Cognitive/Pschomotor | SDMT               | Smartphone      | home     | 2nd vs 3rd at-home measurement | 123 | 0.53  | (0.39 0.65)  | 0.52       |
| Percentage total correct from SDMT                 | Cognitive/Pschomotor | SDMT               | Smartphone      | home     | 3rd vs 4th at-home measurement | 123 | 0.66  | (0.54 0.75)  | 0.63       |
| Percentage total correct from VSWM                 | Cognitive/Pschomotor | VSWM               | Smartphone      | clinic   | Baseline vs. 1st clinic visit  | 118 | 0.37  | (0.2 0.51)   | 0.36       |
| Percentage total correct from VSWM                 | Cognitive/Pschomotor | VSWM               | Smartphone      | home     | 1st vs 2nd at-home measurement | 123 | 0.34  | (0.17 0.49)  | 0.27       |
| Percentage total correct from VSWM                 | Cognitive/Pschomotor | VSWM               | Smartphone      | home     | 2nd vs 3rd at-home measurement | 121 | 0.35  | (0.19 0.5 )  | 0.29       |
| Percentage total correct from VSWM                 | Cognitive/Pschomotor | VSWM               | Smartphone      | home     | 3rd vs 4th at-home measurement | 120 | 0.35  | (0.18 0.5 )  | 0.35       |
| Trail making task A time (ms)                      | Cognitive/Pschomotor | Trails             | Smartphone      | clinic   | Baseline vs. 1st clinic visit  | 109 | 0.43  | (0.27 0.57)  | 0.44       |
| Trail making task A time (ms)                      | Cognitive/Pschomotor | Trails             | Smartphone      | home     | 1st vs 2nd at-home measurement | 126 | 0.49  | (0.35 0.61)  | 0.52       |
| Trail making task A time (ms)                      | Cognitive/Pschomotor | Trails             | Smartphone      | home     | 2nd vs 3rd at-home measurement | 124 | 0.48  | (0.33 0.6 )  | 0.41       |
| Trail making task A time (ms)                      | Cognitive/Pschomotor | Trails             | Smartphone      | home     | 3rd vs 4th at-home measurement | 123 | 0.55  | (0.41 0.66)  | 0.59       |
| Trail making task B minus trail making task A (ms) | Cognitive/Pschomotor | Trails             | Smartphone      | clinic   | Baseline vs. 1st clinic visit  | 92  | -0.03 | (-0.23 0.17) | -0.04      |
| Trail making task B minus trail making task A (ms) | Cognitive/Pschomotor | Trails             | Smartphone      | home     | 1st vs 2nd at-home measurement | 126 | 0.14  | (-0.03 0.31) | 0.15       |
| Trail making task B minus trail making task A (ms) | Cognitive/Pschomotor | Trails             | Smartphone      | home     | 2nd vs 3rd at-home measurement | 123 | 0.06  | (-0.12 0.23) | 0.01       |
| Trail making task B minus trail making task A (ms) | Cognitive/Pschomotor | Trails             | Smartphone      | home     | 3rd vs 4th at-home measurement | 121 | 0.11  | (-0.07 0.28) | 0.08       |
| Trail making task B time (ms)                      | Cognitive/Pschomotor | Trails             | Smartphone      | clinic   | Baseline vs. 1st clinic visit  | 105 | 0.4   | (0.22 0.55)  | 0.46       |
| Trail making task B time (ms)                      | Cognitive/Pschomotor | Trails             | Smartphone      | home     | 1st vs 2nd at-home measurement | 126 | 0.4   | (0.24 0.54)  | 0.43       |
| Trail making task B time (ms)                      | Cognitive/Pschomotor | Trails             | Smartphone      | home     | 2nd vs 3rd at-home measurement | 123 | 0.39  | (0.23 0.53)  | 0.48       |
| Trail making task B time (ms)                      | Cognitive/Pschomotor | Trails             | Smartphone      | home     | 3rd vs 4th at-home measurement | 120 | 0.54  | (0.4 0.65)   | 0.53       |
| Arm range of motion L (degrees) [mean]             | Gait                 | 2 minute walk      | Research accel. | clinic   | Baseline vs. 1st clinic visit  | 110 | 0.93  | (0.9 0.95)   | 0.9        |
| Arm range of motion L (degrees) [mean]             | Gait                 | Dual task          | Research accel. | clinic   | Baseline vs. 1st clinic visit  | 110 | 0.95  | (0.93 0.97)  | 0.93       |
| Arm range of motion L (degrees) [std]              | Gait                 | 2 minute walk      | Research accel. | clinic   | Baseline vs. 1st clinic visit  | 110 | 0.34  | (0.16 0.49)  | 0.5        |
| Arm range of motion L (degrees) [std]              | Gait                 | Dual task          | Research accel. | clinic   | Baseline vs. 1st clinic visit  | 110 | 0.39  | (0.22 0.54)  | 0.56       |
| Arm range of motion R (degrees) [mean]             | Gait                 | 2 minute walk      | Research accel. | clinic   | Baseline vs. 1st clinic visit  | 110 | 0.91  | (0.86 0.93)  | 0.9        |
| Arm range of motion R (degrees) [mean]             | Gait                 | Dual task          | Research accel. | clinic   | Baseline vs. 1st clinic visit  | 110 | 0.93  | (0.9 0.95)   | 0.94       |
| Arm range of motion R (degrees) [std]              | Gait                 | 2 minute walk      | Research accel. | clinic   | Baseline vs. 1st clinic visit  | 110 | 0.26  | (0.07 0.43)  | 0.59       |
| Arm range of motion R (degrees) [std]              | Gait                 | Dual task          | Research accel. | clinic   | Baseline vs. 1st clinic visit  | 110 | 0.53  | (0.38 0.66)  | 0.78       |
| Arm swing velocity L (degrees/s) [mean]            | Gait                 | 2 minute walk      | Research accel. | clinic   | Baseline vs. 1st clinic visit  | 110 | 0.91  | (0.87 0.94)  | 0.86       |
| Arm swing velocity L (degrees/s) [mean]            | Gait                 | Dual task          | Research accel. | clinic   | Baseline vs. 1st clinic visit  | 110 | 0.93  | (0.91 0.95)  | 0.9        |
| Arm swing velocity L (degrees/s) [std]             | Gait                 | 2 minute walk      | Research accel. | clinic   | Baseline vs. 1st clinic visit  | 110 | 0.48  | (0.32 0.61)  | 0.52       |
| Arm swing velocity L (degrees/s) [std]             | Gait                 | Dual task          | Research accel. | clinic   | Baseline vs. 1st clinic visit  | 110 | 0.51  | (0.36 0.64)  | 0.66       |
| Arm swing velocity R (degrees/s) [mean]            | Gait                 | 2 minute walk      | Research accel. | clinic   | Baseline vs. 1st clinic visit  | 110 | 0.9   | (0.85 0.93)  | 0.87       |
| Arm swing velocity R (degrees/s) [mean]            | Gait                 | Dual task          | Research accel. | clinic   | Baseline vs. 1st clinic visit  | 110 | 0.91  | (0.88 0.94)  | 0.9        |
| Arm swing velocity R (degrees/s) [std]             | Gait                 | 2 minute walk      | Research accel. | clinic   | Baseline vs. 1st clinic visit  | 110 | 0.52  | (0.36 0.64)  | 0.67       |
| Arm swing velocity R (degrees/s) [std]             | Gait                 | Dual task          | Research accel. | clinic   | Baseline vs. 1st clinic visit  | 110 | 0.59  | (0.46 0.7 )  | 0.73       |
| Cadence L (steps/min) [mean]                       | Gait                 | 2 minute walk      | Research accel. | clinic   | Baseline vs. 1st clinic visit  | 110 | 0.89  | (0.84 0.92)  | 0.9        |
| Cadence L (steps/min) [mean]                       | Gait                 | Dual task          | Research accel. | clinic   | Baseline vs. 1st clinic visit  | 110 | 0.86  | (0.8 0.9)    | 0.85       |
| Cadence L (steps/min) [std]                        | Gait                 | 2 minute walk      | Research accel. | clinic   | Baseline vs. 1st clinic visit  | 110 | 0.4   | (0.23 0.55)  | 0.57       |
| Cadence L (steps/min) [std]                        | Gait                 | Dual task          | Research accel. | clinic   | Baseline vs. 1st clinic visit  | 110 | 0.49  | (0.33 0.62)  | 0.56       |
| Cadence R (steps/min) [mean]                       | Gait                 | 2 minute walk      | Research accel. | clinic   | Baseline vs. 1st clinic visit  | 110 | 0.89  | (0.84 0.92)  | 0.89       |
| Cadence R (steps/min) [mean]                       | Gait                 | Dual task          | Research accel. | clinic   | Baseline vs. 1st clinic visit  | 110 | 0.86  | (0.8 0.9)    | 0.85       |

|                                           |      |               |                 |        |                               |     |      |             |      |
|-------------------------------------------|------|---------------|-----------------|--------|-------------------------------|-----|------|-------------|------|
| Cadence R (steps/min) [std]               | Gait | 2 minute walk | Research accel. | clinic | Baseline vs. 1st clinic visit | 110 | 0.45 | (0.28 0.59) | 0.58 |
| Cadence R (steps/min) [std]               | Gait | Dual task     | Research accel. | clinic | Baseline vs. 1st clinic visit | 110 | 0.5  | (0.34 0.63) | 0.52 |
| Circumduction L (cm) [mean]               | Gait | 2 minute walk | Research accel. | clinic | Baseline vs. 1st clinic visit | 110 | 0.75 | (0.65 0.82) | 0.76 |
| Circumduction L (cm) [mean]               | Gait | Dual task     | Research accel. | clinic | Baseline vs. 1st clinic visit | 110 | 0.76 | (0.67 0.83) | 0.8  |
| Circumduction L (cm) [std]                | Gait | 2 minute walk | Research accel. | clinic | Baseline vs. 1st clinic visit | 110 | 0.65 | (0.52 0.74) | 0.65 |
| Circumduction L (cm) [std]                | Gait | Dual task     | Research accel. | clinic | Baseline vs. 1st clinic visit | 110 | 0.62 | (0.49 0.73) | 0.67 |
| Circumduction R (cm) [mean]               | Gait | 2 minute walk | Research accel. | clinic | Baseline vs. 1st clinic visit | 110 | 0.72 | (0.61 0.8 ) | 0.75 |
| Circumduction R (cm) [mean]               | Gait | Dual task     | Research accel. | clinic | Baseline vs. 1st clinic visit | 110 | 0.77 | (0.68 0.84) | 0.81 |
| Circumduction R (cm) [std]                | Gait | 2 minute walk | Research accel. | clinic | Baseline vs. 1st clinic visit | 110 | 0.56 | (0.42 0.68) | 0.63 |
| Circumduction R (cm) [std]                | Gait | Dual task     | Research accel. | clinic | Baseline vs. 1st clinic visit | 110 | 0.59 | (0.45 0.7 ) | 0.66 |
| Coronal range of motion (degrees) [mean]  | Gait | 2 minute walk | Research accel. | clinic | Baseline vs. 1st clinic visit | 110 | 0.65 | (0.53 0.75) | 0.66 |
| Coronal range of motion (degrees) [mean]  | Gait | 2 minute walk | Research accel. | clinic | Baseline vs. 1st clinic visit | 110 | 0.9  | (0.86 0.93) | 0.88 |
| Coronal range of motion (degrees) [mean]  | Gait | Dual task     | Research accel. | clinic | Baseline vs. 1st clinic visit | 110 | 0.72 | (0.62 0.8 ) | 0.73 |
| Coronal range of motion (degrees) [mean]  | Gait | Dual task     | Research accel. | clinic | Baseline vs. 1st clinic visit | 110 | 0.91 | (0.87 0.94) | 0.91 |
| Coronal range of motion (degrees) [std]   | Gait | 2 minute walk | Research accel. | clinic | Baseline vs. 1st clinic visit | 110 | 0.5  | (0.34 0.63) | 0.47 |
| Coronal range of motion (degrees) [std]   | Gait | 2 minute walk | Research accel. | clinic | Baseline vs. 1st clinic visit | 110 | 0.67 | (0.55 0.76) | 0.7  |
| Coronal range of motion (degrees) [std]   | Gait | Dual task     | Research accel. | clinic | Baseline vs. 1st clinic visit | 110 | 0.6  | (0.46 0.71) | 0.57 |
| Coronal range of motion (degrees) [std]   | Gait | Dual task     | Research accel. | clinic | Baseline vs. 1st clinic visit | 110 | 0.56 | (0.41 0.68) | 0.7  |
| Cycle duration L (s) [mean]               | Gait | 2 minute walk | Research accel. | clinic | Baseline vs. 1st clinic visit | 110 | 0.88 | (0.83 0.92) | 0.89 |
| Cycle duration L (s) [mean]               | Gait | Dual task     | Research accel. | clinic | Baseline vs. 1st clinic visit | 110 | 0.82 | (0.75 0.87) | 0.85 |
| Cycle duration L (s) [std]                | Gait | 2 minute walk | Research accel. | clinic | Baseline vs. 1st clinic visit | 110 | 0.48 | (0.32 0.61) | 0.49 |
| Cycle duration L (s) [std]                | Gait | Dual task     | Research accel. | clinic | Baseline vs. 1st clinic visit | 110 | 0.48 | (0.33 0.62) | 0.55 |
| Cycle duration R (s) [mean]               | Gait | 2 minute walk | Research accel. | clinic | Baseline vs. 1st clinic visit | 110 | 0.88 | (0.83 0.92) | 0.89 |
| Cycle duration R (s) [mean]               | Gait | Dual task     | Research accel. | clinic | Baseline vs. 1st clinic visit | 110 | 0.82 | (0.74 0.87) | 0.84 |
| Cycle duration R (s) [std]                | Gait | 2 minute walk | Research accel. | clinic | Baseline vs. 1st clinic visit | 110 | 0.61 | (0.48 0.72) | 0.61 |
| Cycle duration R (s) [std]                | Gait | Dual task     | Research accel. | clinic | Baseline vs. 1st clinic visit | 110 | 0.53 | (0.38 0.65) | 0.53 |
| DouBaselinee support L (%GCT) [mean]      | Gait | 2 minute walk | Research accel. | clinic | Baseline vs. 1st clinic visit | 110 | 0.77 | (0.67 0.83) | 0.77 |
| DouBaselinee support L (%GCT) [mean]      | Gait | Dual task     | Research accel. | clinic | Baseline vs. 1st clinic visit | 110 | 0.73 | (0.63 0.81) | 0.78 |
| DouBaselinee support L (%GCT) [std]       | Gait | 2 minute walk | Research accel. | clinic | Baseline vs. 1st clinic visit | 110 | 0.31 | (0.13 0.47) | 0.46 |
| DouBaselinee support L (%GCT) [std]       | Gait | Dual task     | Research accel. | clinic | Baseline vs. 1st clinic visit | 110 | 0.52 | (0.37 0.65) | 0.49 |
| DouBaselinee support R (%GCT) [mean]      | Gait | 2 minute walk | Research accel. | clinic | Baseline vs. 1st clinic visit | 110 | 0.77 | (0.67 0.83) | 0.77 |
| DouBaselinee support R (%GCT) [mean]      | Gait | Dual task     | Research accel. | clinic | Baseline vs. 1st clinic visit | 110 | 0.73 | (0.63 0.81) | 0.79 |
| DouBaselinee support R (%GCT) [std]       | Gait | 2 minute walk | Research accel. | clinic | Baseline vs. 1st clinic visit | 110 | 0.4  | (0.23 0.55) | 0.38 |
| DouBaselinee support R (%GCT) [std]       | Gait | Dual task     | Research accel. | clinic | Baseline vs. 1st clinic visit | 110 | 0.6  | (0.46 0.71) | 0.55 |
| Elevation at midswing L (cm) [mean]       | Gait | 2 minute walk | Research accel. | clinic | Baseline vs. 1st clinic visit | 110 | 0.78 | (0.69 0.84) | 0.75 |
| Elevation at midswing L (cm) [mean]       | Gait | Dual task     | Research accel. | clinic | Baseline vs. 1st clinic visit | 110 | 0.84 | (0.77 0.89) | 0.8  |
| Elevation at midswing L (cm) [std]        | Gait | 2 minute walk | Research accel. | clinic | Baseline vs. 1st clinic visit | 110 | 0.71 | (0.6 0.79)  | 0.71 |
| Elevation at midswing L (cm) [std]        | Gait | Dual task     | Research accel. | clinic | Baseline vs. 1st clinic visit | 110 | 0.61 | (0.47 0.71) | 0.7  |
| Elevation at midswing R (cm) [mean]       | Gait | 2 minute walk | Research accel. | clinic | Baseline vs. 1st clinic visit | 110 | 0.81 | (0.73 0.87) | 0.79 |
| Elevation at midswing R (cm) [mean]       | Gait | Dual task     | Research accel. | clinic | Baseline vs. 1st clinic visit | 110 | 0.83 | (0.76 0.88) | 0.79 |
| Elevation at midswing R (cm) [std]        | Gait | 2 minute walk | Research accel. | clinic | Baseline vs. 1st clinic visit | 110 | 0.61 | (0.48 0.72) | 0.65 |
| Elevation at midswing R (cm) [std]        | Gait | Dual task     | Research accel. | clinic | Baseline vs. 1st clinic visit | 110 | 0.57 | (0.43 0.69) | 0.58 |
| Foot strike angle L (degrees) [mean]      | Gait | 2 minute walk | Research accel. | clinic | Baseline vs. 1st clinic visit | 110 | 0.83 | (0.76 0.88) | 0.82 |
| Foot strike angle L (degrees) [mean]      | Gait | Dual task     | Research accel. | clinic | Baseline vs. 1st clinic visit | 110 | 0.87 | (0.82 0.91) | 0.83 |
| Foot strike angle L (degrees) [std]       | Gait | 2 minute walk | Research accel. | clinic | Baseline vs. 1st clinic visit | 110 | 0.46 | (0.3 0.6)   | 0.49 |
| Foot strike angle L (degrees) [std]       | Gait | Dual task     | Research accel. | clinic | Baseline vs. 1st clinic visit | 110 | 0.45 | (0.29 0.59) | 0.49 |
| Foot strike angle R (degrees) [mean]      | Gait | 2 minute walk | Research accel. | clinic | Baseline vs. 1st clinic visit | 110 | 0.82 | (0.74 0.87) | 0.84 |
| Foot strike angle R (degrees) [mean]      | Gait | Dual task     | Research accel. | clinic | Baseline vs. 1st clinic visit | 110 | 0.87 | (0.82 0.91) | 0.86 |
| Foot strike angle R (degrees) [std]       | Gait | 2 minute walk | Research accel. | clinic | Baseline vs. 1st clinic visit | 110 | 0.48 | (0.32 0.61) | 0.5  |
| Foot strike angle R (degrees) [std]       | Gait | Dual task     | Research accel. | clinic | Baseline vs. 1st clinic visit | 110 | 0.28 | (0.1 0.45)  | 0.63 |
| Lateral step variability L (cm)           | Gait | 2 minute walk | Research accel. | clinic | Baseline vs. 1st clinic visit | 110 | 0.64 | (0.52 0.74) | 0.63 |
| Lateral step variability L (cm)           | Gait | Dual task     | Research accel. | clinic | Baseline vs. 1st clinic visit | 110 | 0.7  | (0.59 0.78) | 0.69 |
| Lateral step variability R (cm)           | Gait | 2 minute walk | Research accel. | clinic | Baseline vs. 1st clinic visit | 110 | 0.64 | (0.51 0.74) | 0.63 |
| Lateral step variability R (cm)           | Gait | Dual task     | Research accel. | clinic | Baseline vs. 1st clinic visit | 110 | 0.59 | (0.45 0.7 ) | 0.62 |
| Sagittal range of motion (degrees) [mean] | Gait | 2 minute walk | Research accel. | clinic | Baseline vs. 1st clinic visit | 110 | 0.4  | (0.23 0.55) | 0.4  |
| Sagittal range of motion (degrees) [mean] | Gait | 2 minute walk | Research accel. | clinic | Baseline vs. 1st clinic visit | 110 | 0.63 | (0.51 0.74) | 0.72 |
| Sagittal range of motion (degrees) [mean] | Gait | Dual task     | Research accel. | clinic | Baseline vs. 1st clinic visit | 110 | 0.49 | (0.33 0.62) | 0.54 |
| Sagittal range of motion (degrees) [mean] | Gait | Dual task     | Research accel. | clinic | Baseline vs. 1st clinic visit | 110 | 0.7  | (0.59 0.79) | 0.76 |
| Sagittal range of motion (degrees) [std]  | Gait | 2 minute walk | Research accel. | clinic | Baseline vs. 1st clinic visit | 110 | 0.26 | (0.07 0.43) | 0.34 |
| Sagittal range of motion (degrees) [std]  | Gait | 2 minute walk | Research accel. | clinic | Baseline vs. 1st clinic visit | 110 | 0.2  | (0.01 0.37) | 0.47 |
| Sagittal range of motion (degrees) [std]  | Gait | Dual task     | Research accel. | clinic | Baseline vs. 1st clinic visit | 110 | 0.3  | (0.12 0.46) | 0.37 |
| Sagittal range of motion (degrees) [std]  | Gait | Dual task     | Research accel. | clinic | Baseline vs. 1st clinic visit | 110 | 0.22 | (0.03 0.39) | 0.54 |
| Single limb support L (%GCT) [mean]       | Gait | 2 minute walk | Research accel. | clinic | Baseline vs. 1st clinic visit | 110 | 0.72 | (0.61 0.8 ) | 0.76 |
| Single limb support L (%GCT) [mean]       | Gait | Dual task     | Research accel. | clinic | Baseline vs. 1st clinic visit | 110 | 0.78 | (0.7 0.85)  | 0.79 |
| Single limb support L (%GCT) [std]        | Gait | 2 minute walk | Research accel. | clinic | Baseline vs. 1st clinic visit | 110 | 0.52 | (0.36 0.64) | 0.58 |
| Single limb support L (%GCT) [std]        | Gait | Dual task     | Research accel. | clinic | Baseline vs. 1st clinic visit | 110 | 0.69 | (0.58 0.78) | 0.65 |
| Single limb support R (%GCT) [mean]       | Gait | 2 minute walk | Research accel. | clinic | Baseline vs. 1st clinic visit | 110 | 0.79 | (0.71 0.86) | 0.76 |
| Single limb support R (%GCT) [mean]       | Gait | Dual task     | Research accel. | clinic | Baseline vs. 1st clinic visit | 110 | 0.63 | (0.5 0.73)  | 0.77 |
| Single limb support R (%GCT) [std]        | Gait | 2 minute walk | Research accel. | clinic | Baseline vs. 1st clinic visit | 110 | 0.34 | (0.16 0.49) | 0.5  |
| Single limb support R (%GCT) [std]        | Gait | Dual task     | Research accel. | clinic | Baseline vs. 1st clinic visit | 110 | 0.59 | (0.45 0.7 ) | 0.54 |
| Speed L (m/s) [mean]                      | Gait | 2 minute walk | Research accel. | clinic | Baseline vs. 1st clinic visit | 110 | 0.88 | (0.82 0.91) | 0.86 |
| Speed L (m/s) [mean]                      | Gait | Dual task     | Research accel. | clinic | Baseline vs. 1st clinic visit | 110 | 0.88 | (0.83 0.92) | 0.86 |

|                                               |      |               |                 |        |                                |     |      |             |      |
|-----------------------------------------------|------|---------------|-----------------|--------|--------------------------------|-----|------|-------------|------|
| Speed L (m/s) [std]                           | Gait | 2 minute walk | Research accel. | clinic | Baseline vs. 1st clinic visit  | 110 | 0.28 | (0.1 0.44)  | 0.41 |
| Speed L (m/s) [std]                           | Gait | Dual task     | Research accel. | clinic | Baseline vs. 1st clinic visit  | 110 | 0.46 | (0.3 0.6)   | 0.51 |
| Speed R (m/s) [mean]                          | Gait | 2 minute walk | Research accel. | clinic | Baseline vs. 1st clinic visit  | 110 | 0.88 | (0.84 0.92) | 0.87 |
| Speed R (m/s) [mean]                          | Gait | Dual task     | Research accel. | clinic | Baseline vs. 1st clinic visit  | 110 | 0.88 | (0.83 0.92) | 0.86 |
| Speed R (m/s) [std]                           | Gait | 2 minute walk | Research accel. | clinic | Baseline vs. 1st clinic visit  | 110 | 0.45 | (0.29 0.59) | 0.48 |
| Speed R (m/s) [std]                           | Gait | Dual task     | Research accel. | clinic | Baseline vs. 1st clinic visit  | 110 | 0.51 | (0.36 0.64) | 0.5  |
| Stance L (%GCT) [mean]                        | Gait | 2 minute walk | Research accel. | clinic | Baseline vs. 1st clinic visit  | 110 | 0.79 | (0.71 0.85) | 0.77 |
| Stance L (%GCT) [mean]                        | Gait | Dual task     | Research accel. | clinic | Baseline vs. 1st clinic visit  | 110 | 0.64 | (0.51 0.74) | 0.78 |
| Stance L (%GCT) [std]                         | Gait | 2 minute walk | Research accel. | clinic | Baseline vs. 1st clinic visit  | 110 | 0.38 | (0.21 0.53) | 0.58 |
| Stance L (%GCT) [std]                         | Gait | Dual task     | Research accel. | clinic | Baseline vs. 1st clinic visit  | 110 | 0.56 | (0.42 0.68) | 0.55 |
| Stance R (%GCT) [mean]                        | Gait | 2 minute walk | Research accel. | clinic | Baseline vs. 1st clinic visit  | 110 | 0.72 | (0.62 0.8 ) | 0.76 |
| Stance R (%GCT) [mean]                        | Gait | Dual task     | Research accel. | clinic | Baseline vs. 1st clinic visit  | 110 | 0.78 | (0.7 0.85)  | 0.79 |
| Stance R (%GCT) [std]                         | Gait | 2 minute walk | Research accel. | clinic | Baseline vs. 1st clinic visit  | 110 | 0.44 | (0.27 0.58) | 0.61 |
| Stance R (%GCT) [std]                         | Gait | Dual task     | Research accel. | clinic | Baseline vs. 1st clinic visit  | 110 | 0.66 | (0.54 0.76) | 0.61 |
| Step duration L (s) [mean]                    | Gait | 2 minute walk | Research accel. | clinic | Baseline vs. 1st clinic visit  | 110 | 0.87 | (0.82 0.91) | 0.89 |
| Step duration L (s) [mean]                    | Gait | Dual task     | Research accel. | clinic | Baseline vs. 1st clinic visit  | 110 | 0.75 | (0.66 0.82) | 0.84 |
| Step duration L (s) [std]                     | Gait | 2 minute walk | Research accel. | clinic | Baseline vs. 1st clinic visit  | 110 | 0.49 | (0.33 0.62) | 0.48 |
| Step duration L (s) [std]                     | Gait | Dual task     | Research accel. | clinic | Baseline vs. 1st clinic visit  | 110 | 0.51 | (0.35 0.63) | 0.52 |
| Step duration R (s) [mean]                    | Gait | 2 minute walk | Research accel. | clinic | Baseline vs. 1st clinic visit  | 110 | 0.87 | (0.81 0.91) | 0.88 |
| Step duration R (s) [mean]                    | Gait | Dual task     | Research accel. | clinic | Baseline vs. 1st clinic visit  | 110 | 0.83 | (0.76 0.88) | 0.85 |
| Step duration R (s) [std]                     | Gait | 2 minute walk | Research accel. | clinic | Baseline vs. 1st clinic visit  | 110 | 0.3  | (0.12 0.46) | 0.34 |
| Step duration R (s) [std]                     | Gait | Dual task     | Research accel. | clinic | Baseline vs. 1st clinic visit  | 110 | 0.53 | (0.39 0.66) | 0.47 |
| Stride length L (m) [mean]                    | Gait | 2 minute walk | Research accel. | clinic | Baseline vs. 1st clinic visit  | 110 | 0.91 | (0.87 0.94) | 0.92 |
| Stride length L (m) [mean]                    | Gait | Dual task     | Research accel. | clinic | Baseline vs. 1st clinic visit  | 110 | 0.92 | (0.88 0.94) | 0.91 |
| Stride length L (m) [std]                     | Gait | 2 minute walk | Research accel. | clinic | Baseline vs. 1st clinic visit  | 110 | 0.19 | (0. 0.36)   | 0.4  |
| Stride length L (m) [std]                     | Gait | Dual task     | Research accel. | clinic | Baseline vs. 1st clinic visit  | 110 | 0.49 | (0.33 0.62) | 0.43 |
| Stride length R (m) [mean]                    | Gait | 2 minute walk | Research accel. | clinic | Baseline vs. 1st clinic visit  | 110 | 0.92 | (0.88 0.94) | 0.93 |
| Stride length R (m) [mean]                    | Gait | Dual task     | Research accel. | clinic | Baseline vs. 1st clinic visit  | 110 | 0.92 | (0.88 0.94) | 0.91 |
| Stride length R (m) [std]                     | Gait | 2 minute walk | Research accel. | clinic | Baseline vs. 1st clinic visit  | 110 | 0.33 | (0.15 0.48) | 0.36 |
| Stride length R (m) [std]                     | Gait | Dual task     | Research accel. | clinic | Baseline vs. 1st clinic visit  | 110 | 0.52 | (0.36 0.64) | 0.44 |
| Swing L (%GCT) [mean]                         | Gait | 2 minute walk | Research accel. | clinic | Baseline vs. 1st clinic visit  | 110 | 0.79 | (0.71 0.85) | 0.77 |
| Swing L (%GCT) [mean]                         | Gait | Dual task     | Research accel. | clinic | Baseline vs. 1st clinic visit  | 110 | 0.64 | (0.51 0.74) | 0.78 |
| Swing L (%GCT) [std]                          | Gait | 2 minute walk | Research accel. | clinic | Baseline vs. 1st clinic visit  | 110 | 0.38 | (0.21 0.53) | 0.58 |
| Swing L (%GCT) [std]                          | Gait | Dual task     | Research accel. | clinic | Baseline vs. 1st clinic visit  | 110 | 0.56 | (0.42 0.68) | 0.55 |
| Swing R (%GCT) [mean]                         | Gait | 2 minute walk | Research accel. | clinic | Baseline vs. 1st clinic visit  | 110 | 0.72 | (0.62 0.8 ) | 0.76 |
| Swing R (%GCT) [mean]                         | Gait | Dual task     | Research accel. | clinic | Baseline vs. 1st clinic visit  | 110 | 0.78 | (0.7 0.85)  | 0.79 |
| Swing R (%GCT) [std]                          | Gait | 2 minute walk | Research accel. | clinic | Baseline vs. 1st clinic visit  | 110 | 0.44 | (0.27 0.58) | 0.61 |
| Swing R (%GCT) [std]                          | Gait | Dual task     | Research accel. | clinic | Baseline vs. 1st clinic visit  | 110 | 0.66 | (0.54 0.76) | 0.61 |
| Terminal douBaselinee support L (%GCT) [mean] | Gait | 2 minute walk | Research accel. | clinic | Baseline vs. 1st clinic visit  | 110 | 0.76 | (0.66 0.83) | 0.76 |
| Terminal douBaselinee support L (%GCT) [mean] | Gait | Dual task     | Research accel. | clinic | Baseline vs. 1st clinic visit  | 110 | 0.41 | (0.24 0.55) | 0.75 |
| Terminal douBaselinee support L (%GCT) [std]  | Gait | 2 minute walk | Research accel. | clinic | Baseline vs. 1st clinic visit  | 110 | 0.49 | (0.33 0.62) | 0.53 |
| Terminal douBaselinee support L (%GCT) [std]  | Gait | Dual task     | Research accel. | clinic | Baseline vs. 1st clinic visit  | 110 | 0.57 | (0.43 0.68) | 0.6  |
| Terminal douBaselinee support R (%GCT) [mean] | Gait | 2 minute walk | Research accel. | clinic | Baseline vs. 1st clinic visit  | 110 | 0.76 | (0.66 0.83) | 0.73 |
| Terminal douBaselinee support R (%GCT) [mean] | Gait | Dual task     | Research accel. | clinic | Baseline vs. 1st clinic visit  | 110 | 0.81 | (0.74 0.87) | 0.81 |
| Terminal douBaselinee support R (%GCT) [std]  | Gait | 2 minute walk | Research accel. | clinic | Baseline vs. 1st clinic visit  | 110 | 0.45 | (0.29 0.59) | 0.46 |
| Terminal douBaselinee support R (%GCT) [std]  | Gait | Dual task     | Research accel. | clinic | Baseline vs. 1st clinic visit  | 110 | 0.6  | (0.47 0.71) | 0.53 |
| Toe off angle L (degrees) [mean]              | Gait | 2 minute walk | Research accel. | clinic | Baseline vs. 1st clinic visit  | 110 | 0.76 | (0.66 0.83) | 0.75 |
| Toe off angle L (degrees) [mean]              | Gait | Dual task     | Research accel. | clinic | Baseline vs. 1st clinic visit  | 110 | 0.79 | (0.71 0.85) | 0.79 |
| Toe off angle L (degrees) [std]               | Gait | 2 minute walk | Research accel. | clinic | Baseline vs. 1st clinic visit  | 110 | 0.52 | (0.37 0.64) | 0.66 |
| Toe off angle L (degrees) [std]               | Gait | Dual task     | Research accel. | clinic | Baseline vs. 1st clinic visit  | 110 | 0.66 | (0.54 0.76) | 0.53 |
| Toe off angle R (degrees) [mean]              | Gait | 2 minute walk | Research accel. | clinic | Baseline vs. 1st clinic visit  | 110 | 0.8  | (0.72 0.86) | 0.83 |
| Toe off angle R (degrees) [mean]              | Gait | Dual task     | Research accel. | clinic | Baseline vs. 1st clinic visit  | 110 | 0.84 | (0.77 0.89) | 0.82 |
| Toe off angle R (degrees) [std]               | Gait | 2 minute walk | Research accel. | clinic | Baseline vs. 1st clinic visit  | 110 | 0.46 | (0.3 0.6)   | 0.56 |
| Toe off angle R (degrees) [std]               | Gait | Dual task     | Research accel. | clinic | Baseline vs. 1st clinic visit  | 110 | 0.22 | (0.03 0.39) | 0.48 |
| Toe out angle L (degrees) [mean]              | Gait | 2 minute walk | Research accel. | clinic | Baseline vs. 1st clinic visit  | 110 | 0.76 | (0.66 0.83) | 0.72 |
| Toe out angle L (degrees) [mean]              | Gait | Dual task     | Research accel. | clinic | Baseline vs. 1st clinic visit  | 110 | 0.74 | (0.64 0.82) | 0.7  |
| Toe out angle L (degrees) [std]               | Gait | 2 minute walk | Research accel. | clinic | Baseline vs. 1st clinic visit  | 110 | 0.56 | (0.42 0.68) | 0.6  |
| Toe out angle L (degrees) [std]               | Gait | Dual task     | Research accel. | clinic | Baseline vs. 1st clinic visit  | 110 | 0.72 | (0.62 0.8 ) | 0.7  |
| Toe out angle R (degrees) [mean]              | Gait | 2 minute walk | Research accel. | clinic | Baseline vs. 1st clinic visit  | 110 | 0.52 | (0.37 0.64) | 0.58 |
| Toe out angle R (degrees) [mean]              | Gait | Dual task     | Research accel. | clinic | Baseline vs. 1st clinic visit  | 110 | 0.53 | (0.38 0.65) | 0.61 |
| Toe out angle R (degrees) [std]               | Gait | 2 minute walk | Research accel. | clinic | Baseline vs. 1st clinic visit  | 110 | 0.59 | (0.45 0.7 ) | 0.63 |
| Toe out angle R (degrees) [std]               | Gait | Dual task     | Research accel. | clinic | Baseline vs. 1st clinic visit  | 110 | 0.67 | (0.55 0.76) | 0.62 |
| Transverse range of motion (degrees) [mean]   | Gait | 2 minute walk | Research accel. | clinic | Baseline vs. 1st clinic visit  | 110 | 0.72 | (0.61 0.8 ) | 0.69 |
| Transverse range of motion (degrees) [mean]   | Gait | 2 minute walk | Research accel. | clinic | Baseline vs. 1st clinic visit  | 110 | 0.77 | (0.69 0.84) | 0.87 |
| Transverse range of motion (degrees) [mean]   | Gait | Dual task     | Research accel. | clinic | Baseline vs. 1st clinic visit  | 110 | 0.76 | (0.67 0.83) | 0.75 |
| Transverse range of motion (degrees) [mean]   | Gait | Dual task     | Research accel. | clinic | Baseline vs. 1st clinic visit  | 110 | 0.89 | (0.85 0.93) | 0.92 |
| Transverse range of motion (degrees) [std]    | Gait | 2 minute walk | Research accel. | clinic | Baseline vs. 1st clinic visit  | 110 | 0.69 | (0.58 0.78) | 0.7  |
| Transverse range of motion (degrees) [std]    | Gait | 2 minute walk | Research accel. | clinic | Baseline vs. 1st clinic visit  | 110 | 0.45 | (0.29 0.59) | 0.68 |
| Transverse range of motion (degrees) [std]    | Gait | Dual task     | Research accel. | clinic | Baseline vs. 1st clinic visit  | 110 | 0.42 | (0.26 0.57) | 0.49 |
| Transverse range of motion (degrees) [std]    | Gait | Dual task     | Research accel. | clinic | Baseline vs. 1st clinic visit  | 110 | 0.52 | (0.36 0.64) | 0.78 |
| Cadence (steps/min) [mean]                    | Gait | 1 minute walk | Smartphone      | clinic | Baseline vs. 1st clinic visit  | 72  | 0.85 | (0.78 0.91) | 0.82 |
| Cadence (steps/min) [mean]                    | Gait | 1 minute walk | Smartphone      | home   | 1st vs 2nd at-home measurement | 122 | 0.84 | (0.78 0.88) | 0.85 |

|                                            |      |               |            |        |                                |     |      |              |       |
|--------------------------------------------|------|---------------|------------|--------|--------------------------------|-----|------|--------------|-------|
| Cadence (steps/min) [mean]                 | Gait | 1 minute walk | Smartphone | home   | 2nd vs 3rd at-home measurement | 117 | 0.82 | (0.75 0.87)  | 0.84  |
| Cadence (steps/min) [mean]                 | Gait | 1 minute walk | Smartphone | home   | 3rd vs 4th at-home measurement | 113 | 0.86 | (0.8 0.9)    | 0.8   |
| Cadence (steps/min) [std]                  | Gait | 1 minute walk | Smartphone | clinic | Baseline vs. 1st clinic visit  | 70  | 0.09 | (-0.15 0.32) | 0.22  |
| Cadence (steps/min) [std]                  | Gait | 1 minute walk | Smartphone | home   | 1st vs 2nd at-home measurement | 120 | 0.39 | (0.23 0.53)  | 0.37  |
| Cadence (steps/min) [std]                  | Gait | 1 minute walk | Smartphone | home   | 2nd vs 3rd at-home measurement | 117 | 0.3  | (0.13 0.46)  | 0.31  |
| Cadence (steps/min) [std]                  | Gait | 1 minute walk | Smartphone | home   | 3rd vs 4th at-home measurement | 109 | 0.4  | (0.23 0.54)  | 0.34  |
| DouBaselinee support (s) [mean]            | Gait | 1 minute walk | Smartphone | clinic | Baseline vs. 1st clinic visit  | 72  | 0.85 | (0.78 0.91)  | 0.82  |
| DouBaselinee support (s) [mean]            | Gait | 1 minute walk | Smartphone | home   | 1st vs 2nd at-home measurement | 122 | 0.83 | (0.77 0.88)  | 0.85  |
| DouBaselinee support (s) [mean]            | Gait | 1 minute walk | Smartphone | home   | 2nd vs 3rd at-home measurement | 117 | 0.84 | (0.78 0.89)  | 0.85  |
| DouBaselinee support (s) [mean]            | Gait | 1 minute walk | Smartphone | home   | 3rd vs 4th at-home measurement | 113 | 0.87 | (0.81 0.91)  | 0.83  |
| DouBaselinee support (s) [std]             | Gait | 1 minute walk | Smartphone | clinic | Baseline vs. 1st clinic visit  | 68  | 0.28 | (0.05 0.49)  | 0.29  |
| DouBaselinee support (s) [std]             | Gait | 1 minute walk | Smartphone | home   | 1st vs 2nd at-home measurement | 122 | 0.29 | (0.12 0.45)  | 0.29  |
| DouBaselinee support (s) [std]             | Gait | 1 minute walk | Smartphone | home   | 2nd vs 3rd at-home measurement | 117 | 0.11 | (-0.08 0.28) | 0.08  |
| DouBaselinee support (s) [std]             | Gait | 1 minute walk | Smartphone | home   | 3rd vs 4th at-home measurement | 109 | 0.38 | (0.21 0.53)  | 0.42  |
| DouBaselinee support (s) asymmetry         | Gait | 1 minute walk | Smartphone | clinic | Baseline vs. 1st clinic visit  | 67  | 0.08 | (-0.16 0.31) | -0.02 |
| DouBaselinee support (s) asymmetry         | Gait | 1 minute walk | Smartphone | home   | 1st vs 2nd at-home measurement | 121 | 0.37 | (0.21 0.51)  | 0.41  |
| DouBaselinee support (s) asymmetry         | Gait | 1 minute walk | Smartphone | home   | 2nd vs 3rd at-home measurement | 115 | 0.43 | (0.27 0.57)  | 0.5   |
| DouBaselinee support (s) asymmetry         | Gait | 1 minute walk | Smartphone | home   | 3rd vs 4th at-home measurement | 107 | 0.57 | (0.42 0.68)  | 0.58  |
| Gait speed (m/s) [mean]                    | Gait | 1 minute walk | Smartphone | clinic | Baseline vs. 1st clinic visit  | 71  | 0.76 | (0.65 0.85)  | 0.65  |
| Gait speed (m/s) [mean]                    | Gait | 1 minute walk | Smartphone | home   | 1st vs 2nd at-home measurement | 121 | 0.77 | (0.69 0.83)  | 0.76  |
| Gait speed (m/s) [mean]                    | Gait | 1 minute walk | Smartphone | home   | 2nd vs 3rd at-home measurement | 116 | 0.78 | (0.7 0.85)   | 0.77  |
| Gait speed (m/s) [mean]                    | Gait | 1 minute walk | Smartphone | home   | 3rd vs 4th at-home measurement | 112 | 0.71 | (0.6 0.79)   | 0.71  |
| Gait speed (m/s) [std]                     | Gait | 1 minute walk | Smartphone | clinic | Baseline vs. 1st clinic visit  | 70  | 0.15 | (-0.08 0.37) | 0.25  |
| Gait speed (m/s) [std]                     | Gait | 1 minute walk | Smartphone | home   | 1st vs 2nd at-home measurement | 121 | 0.09 | (-0.08 0.27) | 0.06  |
| Gait speed (m/s) [std]                     | Gait | 1 minute walk | Smartphone | home   | 2nd vs 3rd at-home measurement | 116 | 0.22 | (0.04 0.39)  | 0.27  |
| Gait speed (m/s) [std]                     | Gait | 1 minute walk | Smartphone | home   | 3rd vs 4th at-home measurement | 109 | 0.34 | (0.17 0.5)   | 0.31  |
| Initial douBaselinee support (s) [mean]    | Gait | 1 minute walk | Smartphone | clinic | Baseline vs. 1st clinic visit  | 72  | 0.82 | (0.72 0.88)  | 0.77  |
| Initial douBaselinee support (s) [mean]    | Gait | 1 minute walk | Smartphone | home   | 1st vs 2nd at-home measurement | 122 | 0.78 | (0.7 0.84)   | 0.82  |
| Initial douBaselinee support (s) [mean]    | Gait | 1 minute walk | Smartphone | home   | 2nd vs 3rd at-home measurement | 117 | 0.82 | (0.74 0.87)  | 0.84  |
| Initial douBaselinee support (s) [mean]    | Gait | 1 minute walk | Smartphone | home   | 3rd vs 4th at-home measurement | 113 | 0.83 | (0.76 0.88)  | 0.79  |
| Initial douBaselinee support (s) [std]     | Gait | 1 minute walk | Smartphone | clinic | Baseline vs. 1st clinic visit  | 67  | 0.12 | (-0.12 0.35) | 0.2   |
| Initial douBaselinee support (s) [std]     | Gait | 1 minute walk | Smartphone | home   | 1st vs 2nd at-home measurement | 120 | 0.42 | (0.26 0.56)  | 0.42  |
| Initial douBaselinee support (s) [std]     | Gait | 1 minute walk | Smartphone | home   | 2nd vs 3rd at-home measurement | 115 | 0.45 | (0.29 0.58)  | 0.39  |
| Initial douBaselinee support (s) [std]     | Gait | 1 minute walk | Smartphone | home   | 3rd vs 4th at-home measurement | 107 | 0.51 | (0.36 0.64)  | 0.5   |
| Initial douBaselinee support (s) asymmetry | Gait | 1 minute walk | Smartphone | clinic | Baseline vs. 1st clinic visit  | 68  | 0.73 | (0.6 0.82)   | 0.53  |
| Initial douBaselinee support (s) asymmetry | Gait | 1 minute walk | Smartphone | home   | 1st vs 2nd at-home measurement | 120 | 0.34 | (0.17 0.49)  | 0.37  |
| Initial douBaselinee support (s) asymmetry | Gait | 1 minute walk | Smartphone | home   | 2nd vs 3rd at-home measurement | 114 | 0.43 | (0.27 0.57)  | 0.37  |
| Initial douBaselinee support (s) asymmetry | Gait | 1 minute walk | Smartphone | home   | 3rd vs 4th at-home measurement | 107 | 0.47 | (0.31 0.6)   | 0.38  |
| Single limb support (s) [mean]             | Gait | 1 minute walk | Smartphone | clinic | Baseline vs. 1st clinic visit  | 72  | 0.82 | (0.73 0.88)  | 0.77  |
| Single limb support (s) [mean]             | Gait | 1 minute walk | Smartphone | home   | 1st vs 2nd at-home measurement | 122 | 0.8  | (0.73 0.86)  | 0.83  |
| Single limb support (s) [mean]             | Gait | 1 minute walk | Smartphone | home   | 2nd vs 3rd at-home measurement | 117 | 0.84 | (0.77 0.88)  | 0.84  |
| Single limb support (s) [mean]             | Gait | 1 minute walk | Smartphone | home   | 3rd vs 4th at-home measurement | 113 | 0.81 | (0.74 0.87)  | 0.79  |
| Single limb support (s) [std]              | Gait | 1 minute walk | Smartphone | clinic | Baseline vs. 1st clinic visit  | 64  | 0.23 | (-0.02 0.45) | 0.34  |
| Single limb support (s) [std]              | Gait | 1 minute walk | Smartphone | home   | 1st vs 2nd at-home measurement | 120 | 0.3  | (0.13 0.45)  | 0.36  |
| Single limb support (s) [std]              | Gait | 1 minute walk | Smartphone | home   | 2nd vs 3rd at-home measurement | 117 | 0.2  | (0.02 0.37)  | 0.24  |
| Single limb support (s) [std]              | Gait | 1 minute walk | Smartphone | home   | 3rd vs 4th at-home measurement | 109 | 0.32 | (0.14 0.48)  | 0.4   |
| Single limb support (s) asymmetry          | Gait | 1 minute walk | Smartphone | clinic | Baseline vs. 1st clinic visit  | 71  | 0.38 | (0.17 0.57)  | 0.37  |
| Single limb support (s) asymmetry          | Gait | 1 minute walk | Smartphone | home   | 1st vs 2nd at-home measurement | 121 | 0.51 | (0.36 0.63)  | 0.51  |
| Single limb support (s) asymmetry          | Gait | 1 minute walk | Smartphone | home   | 2nd vs 3rd at-home measurement | 117 | 0.25 | (0.07 0.41)  | 0.37  |
| Single limb support (s) asymmetry          | Gait | 1 minute walk | Smartphone | home   | 3rd vs 4th at-home measurement | 108 | 0.44 | (0.28 0.58)  | 0.43  |
| Stance (%GCT) asymmetry                    | Gait | 1 minute walk | Smartphone | clinic | Baseline vs. 1st clinic visit  | 72  | 0.42 | (0.22 0.6)   | 0.42  |
| Stance (%GCT) asymmetry                    | Gait | 1 minute walk | Smartphone | home   | 1st vs 2nd at-home measurement | 121 | 0.56 | (0.43 0.67)  | 0.48  |
| Stance (%GCT) asymmetry                    | Gait | 1 minute walk | Smartphone | home   | 2nd vs 3rd at-home measurement | 117 | 0.37 | (0.2 0.52)   | 0.39  |
| Stance (%GCT) asymmetry                    | Gait | 1 minute walk | Smartphone | home   | 3rd vs 4th at-home measurement | 111 | 0.42 | (0.25 0.56)  | 0.45  |
| Stance (s) [mean]                          | Gait | 1 minute walk | Smartphone | clinic | Baseline vs. 1st clinic visit  | 72  | 0.86 | (0.78 0.91)  | 0.82  |
| Stance (s) [mean]                          | Gait | 1 minute walk | Smartphone | home   | 1st vs 2nd at-home measurement | 122 | 0.82 | (0.75 0.87)  | 0.85  |
| Stance (s) [mean]                          | Gait | 1 minute walk | Smartphone | home   | 2nd vs 3rd at-home measurement | 117 | 0.85 | (0.79 0.89)  | 0.86  |
| Stance (s) [mean]                          | Gait | 1 minute walk | Smartphone | home   | 3rd vs 4th at-home measurement | 113 | 0.85 | (0.79 0.89)  | 0.81  |
| Stance (s) [std]                           | Gait | 1 minute walk | Smartphone | clinic | Baseline vs. 1st clinic visit  | 70  | 0.16 | (-0.07 0.38) | 0.25  |
| Stance (s) [std]                           | Gait | 1 minute walk | Smartphone | home   | 1st vs 2nd at-home measurement | 121 | 0.32 | (0.15 0.47)  | 0.39  |
| Stance (s) [std]                           | Gait | 1 minute walk | Smartphone | home   | 2nd vs 3rd at-home measurement | 118 | 0.3  | (0.13 0.46)  | 0.29  |
| Stance (s) [std]                           | Gait | 1 minute walk | Smartphone | home   | 3rd vs 4th at-home measurement | 112 | 0.29 | (0.11 0.45)  | 0.35  |
| Stance (s) asymmetry                       | Gait | 1 minute walk | Smartphone | clinic | Baseline vs. 1st clinic visit  | 71  | 0.36 | (0.14 0.55)  | 0.39  |
| Stance (s) asymmetry                       | Gait | 1 minute walk | Smartphone | home   | 1st vs 2nd at-home measurement | 119 | 0.39 | (0.23 0.54)  | 0.42  |
| Stance (s) asymmetry                       | Gait | 1 minute walk | Smartphone | home   | 2nd vs 3rd at-home measurement | 117 | 0.27 | (0.1 0.43)   | 0.36  |
| Stance (s) asymmetry                       | Gait | 1 minute walk | Smartphone | home   | 3rd vs 4th at-home measurement | 108 | 0.46 | (0.3 0.6)    | 0.46  |
| Step duration (s) [mean]                   | Gait | 1 minute walk | Smartphone | clinic | Baseline vs. 1st clinic visit  | 72  | 0.85 | (0.77 0.9)   | 0.8   |
| Step duration (s) [mean]                   | Gait | 1 minute walk | Smartphone | home   | 1st vs 2nd at-home measurement | 122 | 0.81 | (0.73 0.86)  | 0.84  |
| Step duration (s) [mean]                   | Gait | 1 minute walk | Smartphone | home   | 2nd vs 3rd at-home measurement | 117 | 0.84 | (0.77 0.88)  | 0.84  |
| Step duration (s) [mean]                   | Gait | 1 minute walk | Smartphone | home   | 3rd vs 4th at-home measurement | 113 | 0.81 | (0.74 0.87)  | 0.78  |
| Step duration (s) [std]                    | Gait | 1 minute walk | Smartphone | clinic | Baseline vs. 1st clinic visit  | 67  | 0.17 | (-0.07 0.4)  | 0.29  |
| Step duration (s) [std]                    | Gait | 1 minute walk | Smartphone | home   | 1st vs 2nd at-home measurement | 121 | 0.41 | (0.25 0.55)  | 0.43  |

|                                             |      |               |            |        |                                |     |       |              |       |
|---------------------------------------------|------|---------------|------------|--------|--------------------------------|-----|-------|--------------|-------|
| Step duration (s) [std]                     | Gait | 1 minute walk | Smartphone | home   | 2nd vs 3rd at-home measurement | 116 | 0.31  | (0.14 0.47)  | 0.34  |
| Step duration (s) [std]                     | Gait | 1 minute walk | Smartphone | home   | 3rd vs 4th at-home measurement | 111 | 0.36  | (0.18 0.51)  | 0.43  |
| Step duration (s) asymmetry                 | Gait | 1 minute walk | Smartphone | clinic | Baseline vs. 1st clinic visit  | 72  | 0.43  | (0.22 0.6 )  | 0.37  |
| Step duration (s) asymmetry                 | Gait | 1 minute walk | Smartphone | home   | 1st vs 2nd at-home measurement | 121 | 0.47  | (0.32 0.59)  | 0.41  |
| Step duration (s) asymmetry                 | Gait | 1 minute walk | Smartphone | home   | 2nd vs 3rd at-home measurement | 117 | 0.41  | (0.24 0.55)  | 0.43  |
| Step duration (s) asymmetry                 | Gait | 1 minute walk | Smartphone | home   | 3rd vs 4th at-home measurement | 109 | 0.46  | (0.3 0.6)    | 0.42  |
| Step length (m) [mean]                      | Gait | 1 minute walk | Smartphone | clinic | Baseline vs. 1st clinic visit  | 74  | 0.67  | (0.52 0.78)  | 0.69  |
| Step length (m) [mean]                      | Gait | 1 minute walk | Smartphone | home   | 1st vs 2nd at-home measurement | 121 | 0.7   | (0.59 0.78)  | 0.72  |
| Step length (m) [mean]                      | Gait | 1 minute walk | Smartphone | home   | 2nd vs 3rd at-home measurement | 117 | 0.74  | (0.64 0.81)  | 0.75  |
| Step length (m) [mean]                      | Gait | 1 minute walk | Smartphone | home   | 3rd vs 4th at-home measurement | 112 | 0.73  | (0.63 0.81)  | 0.74  |
| Step length (m) [std]                       | Gait | 1 minute walk | Smartphone | clinic | Baseline vs. 1st clinic visit  | 73  | 0.24  | (0.01 0.44)  | 0.32  |
| Step length (m) [std]                       | Gait | 1 minute walk | Smartphone | home   | 1st vs 2nd at-home measurement | 120 | 0.44  | (0.29 0.58)  | 0.4   |
| Step length (m) [std]                       | Gait | 1 minute walk | Smartphone | home   | 2nd vs 3rd at-home measurement | 113 | 0.38  | (0.21 0.53)  | 0.33  |
| Step length (m) [std]                       | Gait | 1 minute walk | Smartphone | home   | 3rd vs 4th at-home measurement | 108 | 0.53  | (0.38 0.65)  | 0.51  |
| Step length (m) asymmetry                   | Gait | 1 minute walk | Smartphone | clinic | Baseline vs. 1st clinic visit  | 73  | 0.4   | (0.19 0.57)  | 0.51  |
| Step length (m) asymmetry                   | Gait | 1 minute walk | Smartphone | home   | 1st vs 2nd at-home measurement | 120 | 0.38  | (0.22 0.53)  | 0.39  |
| Step length (m) asymmetry                   | Gait | 1 minute walk | Smartphone | home   | 2nd vs 3rd at-home measurement | 113 | 0.52  | (0.38 0.65)  | 0.48  |
| Step length (m) asymmetry                   | Gait | 1 minute walk | Smartphone | home   | 3rd vs 4th at-home measurement | 107 | 0.39  | (0.22 0.54)  | 0.32  |
| Stride duration (s) [mean]                  | Gait | 1 minute walk | Smartphone | clinic | Baseline vs. 1st clinic visit  | 72  | 0.86  | (0.79 0.91)  | 0.82  |
| Stride duration (s) [mean]                  | Gait | 1 minute walk | Smartphone | home   | 1st vs 2nd at-home measurement | 122 | 0.83  | (0.77 0.88)  | 0.86  |
| Stride duration (s) [mean]                  | Gait | 1 minute walk | Smartphone | home   | 2nd vs 3rd at-home measurement | 117 | 0.83  | (0.76 0.88)  | 0.85  |
| Stride duration (s) [mean]                  | Gait | 1 minute walk | Smartphone | home   | 3rd vs 4th at-home measurement | 113 | 0.83  | (0.77 0.88)  | 0.8   |
| Stride duration (s) [std]                   | Gait | 1 minute walk | Smartphone | clinic | Baseline vs. 1st clinic visit  | 67  | 0.08  | (-0.16 0.31) | 0.18  |
| Stride duration (s) [std]                   | Gait | 1 minute walk | Smartphone | home   | 1st vs 2nd at-home measurement | 120 | 0.4   | (0.24 0.54)  | 0.37  |
| Stride duration (s) [std]                   | Gait | 1 minute walk | Smartphone | home   | 2nd vs 3rd at-home measurement | 117 | 0.35  | (0.18 0.5 )  | 0.36  |
| Stride duration (s) [std]                   | Gait | 1 minute walk | Smartphone | home   | 3rd vs 4th at-home measurement | 109 | 0.37  | (0.2 0.52)   | 0.39  |
| Stride duration (s) asymmetry               | Gait | 1 minute walk | Smartphone | clinic | Baseline vs. 1st clinic visit  | 71  | -0.18 | (-0.39 0.06) | -0.12 |
| Stride duration (s) asymmetry               | Gait | 1 minute walk | Smartphone | home   | 1st vs 2nd at-home measurement | 120 | 0.36  | (0.2 0.51)   | 0.39  |
| Stride duration (s) asymmetry               | Gait | 1 minute walk | Smartphone | home   | 2nd vs 3rd at-home measurement | 116 | 0.38  | (0.21 0.52)  | 0.38  |
| Stride duration (s) asymmetry               | Gait | 1 minute walk | Smartphone | home   | 3rd vs 4th at-home measurement | 108 | 0.51  | (0.36 0.64)  | 0.6   |
| Stride length (m) [mean]                    | Gait | 1 minute walk | Smartphone | clinic | Baseline vs. 1st clinic visit  | 74  | 0.68  | (0.53 0.78)  | 0.68  |
| Stride length (m) [mean]                    | Gait | 1 minute walk | Smartphone | home   | 1st vs 2nd at-home measurement | 121 | 0.71  | (0.6 0.79)   | 0.73  |
| Stride length (m) [mean]                    | Gait | 1 minute walk | Smartphone | home   | 2nd vs 3rd at-home measurement | 117 | 0.73  | (0.64 0.81)  | 0.74  |
| Stride length (m) [mean]                    | Gait | 1 minute walk | Smartphone | home   | 3rd vs 4th at-home measurement | 112 | 0.75  | (0.65 0.82)  | 0.76  |
| Stride length (m) [std]                     | Gait | 1 minute walk | Smartphone | clinic | Baseline vs. 1st clinic visit  | 69  | 0.16  | (-0.08 0.38) | 0.23  |
| Stride length (m) [std]                     | Gait | 1 minute walk | Smartphone | home   | 1st vs 2nd at-home measurement | 121 | 0.14  | (-0.03 0.31) | 0.1   |
| Stride length (m) [std]                     | Gait | 1 minute walk | Smartphone | home   | 2nd vs 3rd at-home measurement | 116 | 0.3   | (0.12 0.45)  | 0.27  |
| Stride length (m) [std]                     | Gait | 1 minute walk | Smartphone | home   | 3rd vs 4th at-home measurement | 110 | 0.18  | (-0. 0.36)   | 0.22  |
| Stride length (m) [std]                     | Gait | 1 minute walk | Smartphone | clinic | Baseline vs. 1st clinic visit  | 71  | -0.08 | (-0.3 0.16)  | 0.09  |
| Stride length (m) asymmetry                 | Gait | 1 minute walk | Smartphone | home   | 1st vs 2nd at-home measurement | 120 | 0.24  | (0.06 0.4 )  | 0.3   |
| Stride length (m) asymmetry                 | Gait | 1 minute walk | Smartphone | home   | 2nd vs 3rd at-home measurement | 115 | 0.32  | (0.15 0.47)  | 0.38  |
| Stride length (m) asymmetry                 | Gait | 1 minute walk | Smartphone | home   | 3rd vs 4th at-home measurement | 110 | 0.51  | (0.35 0.63)  | 0.53  |
| Stride length (m) asymmetry                 | Gait | 1 minute walk | Smartphone | clinic | Baseline vs. 1st clinic visit  | 72  | 0.84  | (0.76 0.9 )  | 0.8   |
| Swing (s) [mean]                            | Gait | 1 minute walk | Smartphone | home   | 1st vs 2nd at-home measurement | 122 | 0.82  | (0.76 0.87)  | 0.86  |
| Swing (s) [mean]                            | Gait | 1 minute walk | Smartphone | home   | 2nd vs 3rd at-home measurement | 117 | 0.84  | (0.78 0.89)  | 0.85  |
| Swing (s) [mean]                            | Gait | 1 minute walk | Smartphone | home   | 3rd vs 4th at-home measurement | 113 | 0.82  | (0.75 0.87)  | 0.81  |
| Swing (s) [mean]                            | Gait | 1 minute walk | Smartphone | clinic | Baseline vs. 1st clinic visit  | 68  | 0.36  | (0.13 0.55)  | 0.46  |
| Swing (s) [std]                             | Gait | 1 minute walk | Smartphone | home   | 1st vs 2nd at-home measurement | 121 | 0.35  | (0.19 0.5 )  | 0.45  |
| Swing (s) [std]                             | Gait | 1 minute walk | Smartphone | home   | 2nd vs 3rd at-home measurement | 117 | 0.28  | (0.1 0.44)   | 0.38  |
| Swing (s) [std]                             | Gait | 1 minute walk | Smartphone | home   | 3rd vs 4th at-home measurement | 109 | 0.3   | (0.12 0.46)  | 0.37  |
| Swing (s) [std]                             | Gait | 1 minute walk | Smartphone | clinic | Baseline vs. 1st clinic visit  | 71  | 0.28  | (0.06 0.48)  | 0.31  |
| Swing (s) asymmetry                         | Gait | 1 minute walk | Smartphone | home   | 1st vs 2nd at-home measurement | 121 | 0.44  | (0.29 0.58)  | 0.41  |
| Swing (s) asymmetry                         | Gait | 1 minute walk | Smartphone | home   | 2nd vs 3rd at-home measurement | 117 | 0.32  | (0.15 0.47)  | 0.39  |
| Swing (s) asymmetry                         | Gait | 1 minute walk | Smartphone | home   | 3rd vs 4th at-home measurement | 111 | 0.42  | (0.25 0.56)  | 0.44  |
| Swing (s) asymmetry                         | Gait | 1 minute walk | Smartphone | clinic | Baseline vs. 1st clinic visit  | 72  | 0.84  | (0.76 0.9 )  | 0.82  |
| Terminal douBaselinee support (s) [mean]    | Gait | 1 minute walk | Smartphone | home   | 1st vs 2nd at-home measurement | 122 | 0.83  | (0.76 0.88)  | 0.85  |
| Terminal douBaselinee support (s) [mean]    | Gait | 1 minute walk | Smartphone | home   | 2nd vs 3rd at-home measurement | 117 | 0.85  | (0.79 0.89)  | 0.85  |
| Terminal douBaselinee support (s) [mean]    | Gait | 1 minute walk | Smartphone | home   | 3rd vs 4th at-home measurement | 112 | 0.86  | (0.81 0.9 )  | 0.83  |
| Terminal douBaselinee support (s) [std]     | Gait | 1 minute walk | Smartphone | clinic | Baseline vs. 1st clinic visit  | 67  | 0.55  | (0.35 0.69)  | 0.61  |
| Terminal douBaselinee support (s) [std]     | Gait | 1 minute walk | Smartphone | home   | 1st vs 2nd at-home measurement | 118 | 0.47  | (0.32 0.6 )  | 0.44  |
| Terminal douBaselinee support (s) [std]     | Gait | 1 minute walk | Smartphone | home   | 2nd vs 3rd at-home measurement | 114 | 0.39  | (0.22 0.53)  | 0.31  |
| Terminal douBaselinee support (s) [std]     | Gait | 1 minute walk | Smartphone | home   | 3rd vs 4th at-home measurement | 106 | 0.58  | (0.44 0.69)  | 0.56  |
| Terminal douBaselinee support (s) asymmetry | Gait | 1 minute walk | Smartphone | clinic | Baseline vs. 1st clinic visit  | 67  | 0.72  | (0.58 0.82)  | 0.59  |
| Terminal douBaselinee support (s) asymmetry | Gait | 1 minute walk | Smartphone | home   | 1st vs 2nd at-home measurement | 117 | 0.46  | (0.3 0.59)   | 0.45  |
| Terminal douBaselinee support (s) asymmetry | Gait | 1 minute walk | Smartphone | home   | 2nd vs 3rd at-home measurement | 113 | 0.31  | (0.13 0.46)  | 0.24  |
| Terminal douBaselinee support (s) asymmetry | Gait | 1 minute walk | Smartphone | home   | 3rd vs 4th at-home measurement | 106 | 0.52  | (0.37 0.65)  | 0.48  |
| Turn duration (s) [mean]                    | Gait | 1 minute walk | Smartphone | clinic | Baseline vs. 1st clinic visit  | 113 | 0.5   | (0.34 0.62)  | 0.55  |
| Turn duration (s) [mean]                    | Gait | 1 minute walk | Smartphone | home   | 1st vs 2nd at-home measurement | 126 | 0.43  | (0.28 0.56)  | 0.47  |
| Turn duration (s) [mean]                    | Gait | 1 minute walk | Smartphone | home   | 2nd vs 3rd at-home measurement | 120 | 0.43  | (0.27 0.56)  | 0.42  |
| Turn duration (s) [mean]                    | Gait | 1 minute walk | Smartphone | home   | 3rd vs 4th at-home measurement | 118 | 0.51  | (0.36 0.63)  | 0.46  |
| Arm swing (degrees) [mean]                  | Gait | 1 minute walk | Smartwatch | clinic | Baseline vs. 1st clinic visit  | 74  | 0.84  | (0.76 0.9 )  | 0.81  |
| Arm swing (degrees) [mean]                  | Gait | 1 minute walk | Smartwatch | home   | 1st vs 2nd at-home measurement | 122 | 0.77  | (0.68 0.83)  | 0.81  |

|                                     |        |                    |                 |        |                                |     |      |              |      |
|-------------------------------------|--------|--------------------|-----------------|--------|--------------------------------|-----|------|--------------|------|
| Arm swing (degrees) [mean]          | Gait   | 1 minute walk      | Smartwatch      | home   | 2nd vs 3rd at-home measurement | 118 | 0.78 | (0.7 0.85)   | 0.82 |
| Arm swing (degrees) [mean]          | Gait   | 1 minute walk      | Smartwatch      | home   | 3rd vs 4th at-home measurement | 113 | 0.92 | (0.89 0.95)  | 0.93 |
| Arm swing (degrees) [std]           | Gait   | 1 minute walk      | Smartwatch      | clinic | Baseline vs. 1st clinic visit  | 68  | 0.4  | (0.19 0.59)  | 0.44 |
| Arm swing (degrees) [std]           | Gait   | 1 minute walk      | Smartwatch      | home   | 1st vs 2nd at-home measurement | 121 | 0.32 | (0.15 0.47)  | 0.33 |
| Arm swing (degrees) [std]           | Gait   | 1 minute walk      | Smartwatch      | home   | 2nd vs 3rd at-home measurement | 117 | 0.41 | (0.25 0.55)  | 0.45 |
| Arm swing (degrees) [std]           | Gait   | 1 minute walk      | Smartwatch      | home   | 3rd vs 4th at-home measurement | 112 | 0.52 | (0.37 0.64)  | 0.49 |
| Cepstral peak prominence, zscored   | Speech | Phonation          | Smartphone      | clinic | Baseline vs. 1st clinic visit  | 68  | 0.57 | [0.38 0.71]  | 0.6  |
| Cepstral peak prominence, zscored   | Speech | Phonation          | Smartphone      | home   | 1st vs 2nd at-home measurement | 122 | 0.64 | [0.52 0.74]  | 0.62 |
| Cepstral peak prominence, zscored   | Speech | Phonation          | Smartphone      | home   | 2nd vs 3rd at-home measurement | 122 | 0.63 | [0.51 0.73]  | 0.65 |
| Cepstral peak prominence, zscored   | Speech | Phonation          | Smartphone      | home   | 3rd vs 4th at-home measurement | 119 | 0.73 | [0.63 0.8 ]  | 0.75 |
| Log(pause time), zscored            | Speech | Phonation          | Smartphone      | clinic | Baseline vs. 1st clinic visit  | 68  | 0.34 | [0.12 0.54]  | 0.36 |
| Log(pause time), zscored            | Speech | Phonation          | Smartphone      | home   | 1st vs 2nd at-home measurement | 122 | 0.5  | [0.35 0.62]  | 0.48 |
| Log(pause time), zscored            | Speech | Phonation          | Smartphone      | home   | 2nd vs 3rd at-home measurement | 122 | 0.54 | [0.4 0.66]   | 0.54 |
| Log(pause time), zscored            | Speech | Phonation          | Smartphone      | home   | 3rd vs 4th at-home measurement | 119 | 0.5  | [0.36 0.63]  | 0.46 |
| Mfcc2, zscored                      | Speech | Phonation          | Smartphone      | clinic | Baseline vs. 1st clinic visit  | 68  | 0.38 | [0.16 0.57]  | 0.38 |
| Mfcc2, zscored                      | Speech | Phonation          | Smartphone      | home   | 1st vs 2nd at-home measurement | 121 | 0.48 | [0.33 0.6 ]  | 0.47 |
| Mfcc2, zscored                      | Speech | Phonation          | Smartphone      | home   | 2nd vs 3rd at-home measurement | 120 | 0.6  | [0.48 0.71]  | 0.59 |
| Mfcc2, zscored                      | Speech | Phonation          | Smartphone      | home   | 3rd vs 4th at-home measurement | 118 | 0.53 | [0.39 0.65]  | 0.47 |
| Monopitch (semitone range), zscored | Speech | Reading            | Smartphone      | clinic | Baseline vs. 1st clinic visit  | 68  | 0.64 | [0.48 0.76]  | 0.64 |
| Monopitch (semitone range), zscored | Speech | Reading            | Smartphone      | home   | 1st vs 2nd at-home measurement | 122 | 0.67 | [0.56 0.75]  | 0.67 |
| Monopitch (semitone range), zscored | Speech | Reading            | Smartphone      | home   | 2nd vs 3rd at-home measurement | 122 | 0.66 | [0.55 0.75]  | 0.66 |
| Monopitch (semitone range), zscored | Speech | Reading            | Smartphone      | home   | 3rd vs 4th at-home measurement | 119 | 0.67 | [0.55 0.76]  | 0.63 |
| Speech composite                    | Speech | Phonation, reading | Smartphone      | clinic | Baseline vs. 1st clinic visit  | 68  | 0.61 | [0.43 0.74]  | 0.57 |
| Speech composite                    | Speech | Phonation, reading | Smartphone      | home   | 1st vs 2nd at-home measurement | 122 | 0.63 | [0.51 0.73]  | 0.57 |
| Speech composite                    | Speech | Phonation, reading | Smartphone      | home   | 2nd vs 3rd at-home measurement | 122 | 0.63 | [0.51 0.73]  | 0.59 |
| Speech composite                    | Speech | Phonation, reading | Smartphone      | home   | 3rd vs 4th at-home measurement | 119 | 0.66 | [0.55 0.75]  | 0.65 |
| Angle (degrees) [mean]              | Turn   | 2 minute walk      | Research accel. | clinic | Baseline vs. 1st clinic visit  | 110 | 0.33 | (0.15 0.48)  | 0.42 |
| Angle (degrees) [mean]              | Turn   | Dual task          | Research accel. | clinic | Baseline vs. 1st clinic visit  | 110 | 0.63 | (0.5 0.73)   | 0.49 |
| Angle (degrees) [std]               | Turn   | 2 minute walk      | Research accel. | clinic | Baseline vs. 1st clinic visit  | 110 | 0.06 | (-0.13 0.24) | 0.34 |
| Angle (degrees) [std]               | Turn   | Dual task          | Research accel. | clinic | Baseline vs. 1st clinic visit  | 110 | 0.44 | (0.27 0.58)  | 0.48 |
| Duration (s) [mean]                 | Turn   | 2 minute walk      | Research accel. | clinic | Baseline vs. 1st clinic visit  | 110 | 0.7  | (0.59 0.78)  | 0.71 |
| Duration (s) [mean]                 | Turn   | Dual task          | Research accel. | clinic | Baseline vs. 1st clinic visit  | 110 | 0.78 | (0.7 0.85)   | 0.76 |
| Duration (s) [std]                  | Turn   | 2 minute walk      | Research accel. | clinic | Baseline vs. 1st clinic visit  | 110 | 0.38 | (0.21 0.53)  | 0.43 |
| Duration (s) [std]                  | Turn   | Dual task          | Research accel. | clinic | Baseline vs. 1st clinic visit  | 110 | 0.43 | (0.26 0.57)  | 0.4  |
| Steps in turn (#) [mean]            | Turn   | 2 minute walk      | Research accel. | clinic | Baseline vs. 1st clinic visit  | 110 | 0.58 | (0.45 0.69)  | 0.56 |
| Steps in turn (#) [mean]            | Turn   | Dual task          | Research accel. | clinic | Baseline vs. 1st clinic visit  | 110 | 0.74 | (0.65 0.82)  | 0.74 |
| Steps in turn (#) [std]             | Turn   | 2 minute walk      | Research accel. | clinic | Baseline vs. 1st clinic visit  | 110 | 0.12 | (-0.07 0.3 ) | 0.15 |
| Steps in turn (#) [std]             | Turn   | Dual task          | Research accel. | clinic | Baseline vs. 1st clinic visit  | 110 | 0.15 | (-0.03 0.33) | 0.16 |
| Turn velocity (degrees/s) [mean]    | Turn   | 2 minute walk      | Research accel. | clinic | Baseline vs. 1st clinic visit  | 110 | 0.83 | (0.76 0.88)  | 0.83 |
| Turn velocity (degrees/s) [mean]    | Turn   | Dual task          | Research accel. | clinic | Baseline vs. 1st clinic visit  | 110 | 0.86 | (0.8 0.9)    | 0.85 |
| Turn velocity (degrees/s) [std]     | Turn   | 2 minute walk      | Research accel. | clinic | Baseline vs. 1st clinic visit  | 110 | 0.36 | (0.18 0.51)  | 0.38 |
| Turn velocity (degrees/s) [std]     | Turn   | Dual task          | Research accel. | clinic | Baseline vs. 1st clinic visit  | 110 | 0.35 | (0.17 0.5 )  | 0.28 |
| Turn duration (s) [std]             | Turn   | 1 minute walk      | Smartphone      | clinic | Baseline vs. 1st clinic visit  | 108 | 0.21 | (0.02 0.38)  | 0.1  |
| Turn duration (s) [std]             | Turn   | 1 minute walk      | Smartphone      | home   | 1st vs 2nd at-home measurement | 125 | 0.28 | (0.11 0.43)  | 0.29 |
| Turn duration (s) [std]             | Turn   | 1 minute walk      | Smartphone      | home   | 2nd vs 3rd at-home measurement | 119 | 0.31 | (0.14 0.46)  | 0.36 |
| Turn duration (s) [std]             | Turn   | 1 minute walk      | Smartphone      | home   | 3rd vs 4th at-home measurement | 116 | 0.5  | (0.35 0.63)  | 0.47 |

Supplementary Table 2: Model-Fitted Analysis Results Utilizing Generalized Additive Model (GAM). Std. Diff., Standardized Difference; CI, Confidence Interval. MDS-UPDRS, the Movement Disorder Society-Sponsored Revision of the Unified Parkinson's Disease Rating Scale. SDMT, Symbol-Digit Modalities Test. VSWM, Visuospatial Working Memory Task. GCT, Gait Cycle Time. PD, Parkinson's Disease.

| Feature                                            | Domain      | Task               | Device          | Location | Cohort   | n  | Month 0<br>(Mean & SD) | Month 12<br>(Mean & SD) | Std. Diff | Std. Diff 95% CI | Pvalues |
|----------------------------------------------------|-------------|--------------------|-----------------|----------|----------|----|------------------------|-------------------------|-----------|------------------|---------|
| Finemotor dominant hand                            | Psychomotor | Finemotor          | Smartphone      | clinic   | Controls | 48 | 5.1 (1.0)              | 6.0 (1.2)               | 0.7       | (0.4, 1.1)       | <0.001  |
| Finemotor dominant hand                            | Psychomotor | Finemotor          | Smartphone      | clinic   | PD       | 78 | 3.9 (1.2)              | 4.3 (1.6)               | 0.3       | (-0.04, 0.6)     | 0.09    |
| Finemotor dominant hand                            | Psychomotor | Finemotor          | Smartphone      | home     | Controls | 46 | 5.3 (0.9)              | 6.0 (1.2)               | 0.5       | (0.3, 0.8)       | <0.001  |
| Finemotor dominant hand                            | Psychomotor | Finemotor          | Smartphone      | home     | PD       | 76 | 3.9 (1.2)              | 4.3 (1.6)               | 0.3       | (-0.2, 0.7)      | 0.21    |
| Finemotor less affected hand                       | Psychomotor | Finemotor          | Smartphone      | clinic   | PD       | 78 | 4.0 (1.3)              | 4.5 (1.5)               | 0.4       | (0.1, 0.7)       | 0.005   |
| Finemotor less affected hand                       | Psychomotor | Finemotor          | Smartphone      | home     | PD       | 76 | 4.0 (1.2)              | 5.0 (1.5)               | 0.8       | (0.3, 1.2)       | <0.001  |
| Finemotor more affected side                       | Psychomotor | Finemotor          | Smartphone      | clinic   | PD       | 78 | 3.6 (1.1)              | 3.6 (1.3)               | 0.04      | (-0.3, 0.4)      | 0.83    |
| Finemotor more affected side                       | Psychomotor | Finemotor          | Smartphone      | home     | PD       | 76 | 3.7 (1.1)              | 3.3 (1.2)               | -0.3      | (-0.5, 0.02)     | 0.07    |
| Finemotor nondominant hand                         | Psychomotor | Finemotor          | Smartphone      | clinic   | Controls | 48 | 4.5 (1.1)              | 5.5 (1.2)               | 0.9       | (0.5, 1.3)       | <0.001  |
| Finemotor nondominant hand                         | Psychomotor | Finemotor          | Smartphone      | clinic   | PD       | 78 | 3.8 (1.2)              | 3.9 (1.3)               | 0.1       | (-0.2, 0.4)      | 0.39    |
| Finemotor nondominant hand                         | Psychomotor | Finemotor          | Smartphone      | home     | Controls | 46 | 4.7 (1.1)              | 5.2 (1.2)               | 0.4       | (0.09, 0.6)      | 0.008   |
| Finemotor nondominant hand                         | Psychomotor | Finemotor          | Smartphone      | home     | PD       | 76 | 3.9 (1.1)              | 3.9 (1.3)               | 0.01      | (-0.3, 0.3)      | 0.93    |
| Fingertapping dominant hand                        | Psychomotor | Fingertapping      | Smartphone      | clinic   | Controls | 48 | 135.9 (28.8)           | 160.7 (36.6)            | 1         | (0.5, 1.4)       | <0.001  |
| Fingertapping dominant hand                        | Psychomotor | Fingertapping      | Smartphone      | clinic   | PD       | 78 | 107.7 (36.6)           | 144.3 (52.2)            | 1.3       | (0.8, 1.8)       | <0.001  |
| Fingertapping dominant hand                        | Psychomotor | Fingertapping      | Smartphone      | home     | Controls | 46 | 145.4 (34.7)           | 156.3 (38.4)            | 0.6       | (-0.006, 1.1)    | 0.05    |
| Fingertapping dominant hand                        | Psychomotor | Fingertapping      | Smartphone      | home     | PD       | 76 | 116.6 (41.5)           | 141.2 (54.1)            | 1         | (0.5, 1.5)       | <0.001  |
| Fingertapping less affected hand                   | Psychomotor | Fingertapping      | Smartphone      | clinic   | PD       | 78 | 115.1 (38.3)           | 142.2 (48.7)            | 1         | (0.5, 1.4)       | <0.001  |
| Fingertapping less affected hand                   | Psychomotor | Fingertapping      | Smartphone      | home     | PD       | 76 | 122.2 (43.9)           | 146.5 (52.9)            | 1.1       | (0.6, 1.6)       | <0.001  |
| Fingertapping more affected hand                   | Psychomotor | Fingertapping      | Smartphone      | clinic   | PD       | 78 | 102.0 (34.7)           | 135.8 (52.7)            | 1.2       | (0.7, 1.8)       | <0.001  |
| Fingertapping more affected hand                   | Psychomotor | Fingertapping      | Smartphone      | home     | PD       | 76 | 111.0 (40.9)           | 132.7 (52.2)            | 0.8       | (0.4, 1.3)       | <0.001  |
| Fingertapping nondominant hand                     | Psychomotor | Fingertapping      | Smartphone      | clinic   | Controls | 48 | 126.9 (28.6)           | 151.3 (35.6)            | 1.1       | (0.6, 1.7)       | <0.001  |
| Fingertapping nondominant hand                     | Psychomotor | Fingertapping      | Smartphone      | clinic   | PD       | 78 | 109.3 (37.2)           | 134.4 (48.5)            | 0.9       | (0.5, 1.4)       | <0.001  |
| Fingertapping nondominant hand                     | Psychomotor | Fingertapping      | Smartphone      | home     | Controls | 46 | 130.8 (32.2)           | 149.1 (36.8)            | 1.2       | (0.5, 1.8)       | <0.001  |
| Fingertapping nondominant hand                     | Psychomotor | Fingertapping      | Smartphone      | home     | PD       | 76 | 116.5 (43.6)           | 137.9 (51.3)            | 0.9       | (0.4, 1.4)       | <0.001  |
| Intertap intervals (ms) dominant hand              | Psychomotor | Intertap intervals | Smartphone      | clinic   | Controls | 48 | 161.4 (19.3)           | 130.9 (37.2)            | -0.4      | (-0.7, -0.05)    | 0.02    |
| Intertap intervals (ms) dominant hand              | Psychomotor | Intertap intervals | Smartphone      | clinic   | PD       | 78 | 206.0 (54.9)           | 154.0 (86.4)            | -0.5      | (-0.9, -0.2)     | 0.005   |
| Intertap intervals (ms) dominant hand              | Psychomotor | Intertap intervals | Smartphone      | home     | Controls | 46 | 140.7 (36.7)           | 110.9 (42.5)            | -0.5      | (-0.7, -0.2)     | <0.001  |
| Intertap intervals (ms) dominant hand              | Psychomotor | Intertap intervals | Smartphone      | home     | PD       | 76 | 178.1 (63.3)           | 152.1 (96.0)            | -0.3      | (-0.6, 0.1)      | 0.15    |
| Intertap intervals (ms) less affected side         | Psychomotor | Intertap intervals | Smartphone      | clinic   | PD       | 78 | 203.1 (71.2)           | 147.6 (98.8)            | -0.6      | (-1.0, -0.2)     | 0.002   |
| Intertap intervals (ms) less affected side         | Psychomotor | Intertap intervals | Smartphone      | home     | PD       | 76 | 176.9 (69.3)           | 138.9 (90.8)            | -0.4      | (-0.7, -0.1)     | 0.005   |
| Intertap intervals (ms) more affected side         | Psychomotor | Intertap intervals | Smartphone      | clinic   | PD       | 76 | 218.0 (53.3)           | 160.7 (80.3)            | -0.6      | (-0.9, -0.2)     | 0.002   |
| Intertap intervals (ms) more affected side         | Psychomotor | Intertap intervals | Smartphone      | home     | PD       | 76 | 206.1 (65.1)           | 177.6 (92.5)            | -0.3      | (-0.6, 0.09)     | 0.14    |
| Intertap intervals (ms) nondominant hand           | Psychomotor | Intertap intervals | Smartphone      | clinic   | Controls | 48 | 146.7 (30.8)           | 124.5 (54.3)            | -0.3      | (-0.6, 0.04)     | 0.08    |
| Intertap intervals (ms) nondominant hand           | Psychomotor | Intertap intervals | Smartphone      | clinic   | PD       | 77 | 221.6 (64.7)           | 157.5 (83.5)            | -0.6      | (-0.9, -0.3)     | <0.001  |
| Intertap intervals (ms) nondominant hand           | Psychomotor | Intertap intervals | Smartphone      | home     | Controls | 46 | 147.5 (40.1)           | 116.4 (50.5)            | -0.4      | (-0.7, -0.1)     | 0.003   |
| Intertap intervals (ms) nondominant hand           | Psychomotor | Intertap intervals | Smartphone      | home     | PD       | 76 | 205.4 (76.3)           | 163.7 (92.5)            | -0.4      | (-0.7, -0.1)     | 0.007   |
| Percentage total correct from SDMT                 | Cognitive   | SDMT               | Smartphone      | clinic   | Controls | 49 | 21.7 (3.7)             | 25.4 (4.0)              | 0.8       | (0.5, 1.1)       | <0.001  |
| Percentage total correct from SDMT                 | Cognitive   | SDMT               | Smartphone      | clinic   | PD       | 80 | 19.7 (4.7)             | 21.2 (5.5)              | 0.3       | (0, 0.6)         | 0.05    |
| Percentage total correct from SDMT                 | Cognitive   | SDMT               | Smartphone      | home     | Controls | 47 | 22.5 (4.0)             | 26.4 (4.1)              | 0.8       | (0.4, 1.2)       | <0.001  |
| Percentage total correct from SDMT                 | Cognitive   | SDMT               | Smartphone      | home     | PD       | 78 | 20.5 (4.4)             | 22.2 (4.9)              | 0.3       | (0.05, 0.6)      | 0.02    |
| Percentage total correct from VSWM                 | Cognitive   | VSWM               | Smartphone      | clinic   | Controls | 48 | 74.4 (6.9)             | 80.6 (8.3)              | 0.5       | (0.2, 0.9)       | <0.001  |
| Percentage total correct from VSWM                 | Cognitive   | VSWM               | Smartphone      | clinic   | PD       | 78 | 74.3 (6.6)             | 77.9 (8.0)              | 0.3       | (0.02, 0.6)      | 0.04    |
| Percentage total correct from VSWM                 | Cognitive   | VSWM               | Smartphone      | home     | Controls | 46 | 77.5 (6.7)             | 81.5 (8.5)              | 0.3       | (0.09, 0.6)      | 0.007   |
| Percentage total correct from VSWM                 | Cognitive   | VSWM               | Smartphone      | home     | PD       | 76 | 73.9 (5.6)             | 80.7 (6.5)              | 0.5       | (0.3, 0.7)       | <0.001  |
| Trail making task A time (ms)                      | Cognitive   | Trails             | Smartphone      | clinic   | Controls | 49 | 23912.0 (5277.0)       | 18461.0 (4901.0)        | -0.7      | (-1.1, -0.4)     | <0.001  |
| Trail making task A time (ms)                      | Cognitive   | Trails             | Smartphone      | clinic   | PD       | 80 | 27843.0 (5745.0)       | 23520.0 (6684.0)        | -0.5      | (-0.8, -0.2)     | <0.001  |
| Trail making task A time (ms)                      | Cognitive   | Trails             | Smartphone      | home     | Controls | 47 | 22717.0 (4123.0)       | 18239.0 (4120.0)        | -0.7      | (-1.0, -0.4)     | <0.001  |
| Trail making task A time (ms)                      | Cognitive   | Trails             | Smartphone      | home     | PD       | 78 | 24719.0 (5109.0)       | 23091.0 (6599.0)        | -0.2      | (-0.5, 0.04)     | 0.09    |
| Trail making task B minus trail making task A (ms) | Cognitive   | Trails             | Smartphone      | clinic   | Controls | 49 | 296.0 (1526.0)         | 1862.0 (1526.0)         | 0.1       | (-0.1, 0.4)      | 0.24    |
| Trail making task B minus trail making task A (ms) | Cognitive   | Trails             | Smartphone      | clinic   | PD       | 79 | 550.0 (3085.0)         | 3826.0 (3169.0)         | 0.3       | (0.06, 0.6)      | 0.02    |
| Trail making task B minus trail making task A (ms) | Cognitive   | Trails             | Smartphone      | home     | Controls | 47 | 538.0 (862.0)          | 1522.0 (861.0)          | 0.1       | (-0.09, 0.3)     | 0.27    |
| Trail making task B minus trail making task A (ms) | Cognitive   | Trails             | Smartphone      | home     | PD       | 78 | 660.0 (778.0)          | 1208.0 (781.0)          | 0.06      | (-0.1, 0.2)      | 0.53    |
| Trail making task B time (ms)                      | Cognitive   | Trails             | Smartphone      | clinic   | Controls | 49 | 24870.0 (3838.0)       | 19656.0 (3913.0)        | -0.6      | (-0.9, -0.3)     | <0.001  |
| Trail making task B time (ms)                      | Cognitive   | Trails             | Smartphone      | clinic   | PD       | 80 | 28195.0 (6705.0)       | 27397.0 (8730.0)        | -0.09     | (-0.4, 0.3)      | 0.61    |
| Trail making task B time (ms)                      | Cognitive   | Trails             | Smartphone      | home     | Controls | 47 | 23245.0 (3789.0)       | 19476.0 (3791.0)        | -0.6      | (-0.8, -0.3)     | <0.001  |
| Trail making task B time (ms)                      | Cognitive   | Trails             | Smartphone      | home     | PD       | 78 | 27227.0 (5401.0)       | 24785.0 (6398.0)        | -0.3      | (-0.6, -0.06)    | 0.02    |
| Arm swing (deg) average of both arms               | Gait        | 2 minute walk      | Research accel. | clinic   | Controls | 48 | 54.9 (15.2)            | 53.6 (17.2)             | -0.2      | (-0.6, 0.3)      | 0.46    |
| Arm swing (deg) average of both arms               | Gait        | 2 minute walk      | Research accel. | clinic   | PD       | 78 | 33.5 (16.3)            | 28.5 (16.6)             | -0.8      | (-1.1, -0.5)     | <0.001  |
| Arm swing (deg) average of both arms               | Gait        | Dual task          | Research accel. | clinic   | Controls | 48 | 54.2 (15.2)            | 55.0 (18.3)             | 0.09      | (-0.4, 0.6)      | 0.72    |
| Arm swing (deg) average of both arms               | Gait        | Dual task          | Research accel. | clinic   | PD       | 77 | 32.3 (17.0)            | 27.5 (17.2)             | -0.9      | (-1.2, -0.5)     | <0.001  |
| Arm swing (deg) less affected arm                  | Gait        | 2 minute walk      | Research accel. | clinic   | PD       | 78 | 24.6 (16.9)            | 20.5 (16.4)             | -0.6      | (-0.9, -0.2)     | <0.001  |
| Arm swing (deg) less affected arm                  | Gait        | Dual task          | Research accel. | clinic   | PD       | 77 | 21.8 (16.8)            | 17.7 (16.3)             | -0.6      | (-0.9, -0.3)     | <0.001  |
| Arm swing (deg) more affected arm                  | Gait        | 2 minute walk      | Research accel. | clinic   | PD       | 78 | 42.4 (20.3)            | 36.5 (20.9)             | -0.7      | (-1.0, -0.3)     | <0.001  |
| Arm swing (deg) more affected arm                  | Gait        | Dual task          | Research accel. | clinic   | PD       | 77 | 42.4 (22.4)            | 36.9 (23.0)             | -0.7      | (-1.1, -0.4)     | <0.001  |
| Arm swing (deg) watch arm                          | Gait        | 1 minute walk      | Smartwatch      | clinic   | Controls | 45 | 47.5 (17.2)            | 47.3 (17.8)             | -0.01     | (-0.3, 0.3)      | 0.94    |

|                                                 |      |               |                         |        |          |    |              |              |        |                |        |
|-------------------------------------------------|------|---------------|-------------------------|--------|----------|----|--------------|--------------|--------|----------------|--------|
| Arm swing (deg) watch arm                       | Gait | 1 minute walk | Smartwatch              | clinic | PD       | 66 | 25.9 (15.3)  | 19.9 (13.7)  | -0.6   | (-1.0, -0.2)   | 0.004  |
| Arm swing (deg) watch arm                       | Gait | 1 minute walk | Smartwatch              | home   | Controls | 47 | 44.5 (13.9)  | 44.7 (20.1)  | 0.01   | (-0.5, 0.5)    | 0.96   |
| Arm swing (deg) watch arm                       | Gait | 1 minute walk | Smartwatch              | home   | PD       | 71 | 23.0 (12.9)  | 20.6 (12.5)  | -0.3   | (-0.6, 0.03)   | 0.07   |
| Arm swing velocity(deg/s) average of both arms  | Gait | 2 minute walk | Research accel.         | clinic | Controls | 48 | 233.7 (58.0) | 227.7 (66.2) | -0.2   | (-0.5, 0.2)    | 0.38   |
| Arm swing velocity(deg/s) average of both arms  | Gait | 2 minute walk | Research accel.         | clinic | PD       | 78 | 169.5 (76.5) | 157.9 (77.0) | -0.4   | (-0.7, -0.09)  | 0.01   |
| Arm swing velocity(deg/s) average of both arms  | Gait | Dual task     | Research accel.         | clinic | Controls | 48 | 236.5 (59.4) | 234.7 (71.0) | -0.05  | (-0.5, 0.4)    | 0.84   |
| Arm swing velocity(deg/s) average of both arms  | Gait | Dual task     | Research accel.         | clinic | PD       | 77 | 168.4 (80.2) | 157.9 (83.6) | -0.4   | (-0.7, -0.02)  | 0.04   |
| Arm swing velocity(deg/s) less affected arm     | Gait | 2 minute walk | Research accel.         | clinic | PD       | 78 | 157.5 (85.8) | 149.6 (85.5) | -0.2   | (-0.6, 0.1)    | 0.23   |
| Arm swing velocity(deg/s) less affected arm     | Gait | Dual task     | Research accel.         | clinic | PD       | 77 | 151.8 (86.5) | 150.4 (89.9) | -0.03  | (-0.3, 0.3)    | 0.84   |
| Arm swing velocity(deg/s) more affected arm     | Gait | 2 minute walk | Research accel.         | clinic | PD       | 78 | 181.4 (86.6) | 166.2 (87.6) | -0.5   | (-0.8, -0.1)   | 0.004  |
| Arm swing velocity(deg/s) more affected arm     | Gait | Dual task     | Research accel.         | clinic | PD       | 77 | 185.1 (95.6) | 165.3 (97.9) | -0.7   | (-1.0, -0.3)   | <0.001 |
| Cadence (steps/min)                             | Gait | 1 minute walk | Smartphone              | clinic | Controls | 45 | 113.4 (8.5)  | 113.6 (8.8)  | 0.03   | (-0.3, 0.3)    | 0.87   |
| Cadence (steps/min)                             | Gait | 1 minute walk | Smartphone              | clinic | PD       | 65 | 108.5 (7.9)  | 107.9 (7.9)  | -0.08  | (-0.4, 0.3)    | 0.67   |
| Cadence (steps/min)                             | Gait | 1 minute walk | Smartphone              | home   | Controls | 47 | 111.3 (9.7)  | 110.1 (10.1) | -0.2   | (-0.5, 0.2)    | 0.31   |
| Cadence (steps/min)                             | Gait | 1 minute walk | Smartphone              | home   | PD       | 71 | 107.1 (8.7)  | 106.2 (9.0)  | -0.1   | (-0.5, 0.2)    | 0.43   |
| Cadence (steps/min) average of both legs        | Gait | 2 minute walk | Research accel.         | clinic | Controls | 48 | 113.6 (9.3)  | 113.1 (8.9)  | -0.1   | (-0.5, 0.3)    | 0.55   |
| Cadence (steps/min) average of both legs        | Gait | 2 minute walk | Research accel.         | clinic | PD       | 78 | 108.8 (7.2)  | 107.4 (7.7)  | -0.4   | (-0.7, 0.02)   | 0.06   |
| Cadence (steps/min) average of both legs        | Gait | Dual task     | Research accel.         | clinic | Controls | 48 | 109.0 (9.7)  | 109.3 (9.5)  | 0.07   | (-0.3, 0.5)    | 0.74   |
| Cadence (steps/min) average of both legs        | Gait | Dual task     | Research accel.         | clinic | PD       | 77 | 104.2 (8.1)  | 104.3 (8.3)  | 0.02   | (-0.3, 0.3)    | 0.88   |
| Circumduction (cm) average of both legs         | Gait | 2 minute walk | Research accel.         | clinic | Controls | 48 | 3.3 (1.1)    | 3.4 (1.1)    | 0.09   | (-0.3, 0.4)    | 0.61   |
| Circumduction (cm) average of both legs         | Gait | 2 minute walk | Research accel.         | clinic | PD       | 78 | 3.4 (1.2)    | 3.4 (1.2)    | -0.1   | (-0.4, 0.2)    | 0.47   |
| Circumduction (cm) average of both legs         | Gait | Dual task     | Research accel.         | clinic | Controls | 48 | 3.4 (1.2)    | 3.4 (1.3)    | 0.006  | (-0.3, 0.3)    | 0.97   |
| Circumduction (cm) average of both legs         | Gait | Dual task     | Research accel.         | clinic | PD       | 77 | 3.4 (1.2)    | 3.3 (1.2)    | -0.09  | (-0.4, 0.2)    | 0.51   |
| Coronal range of motion (deg)                   | Gait | 2 minute walk | Research accel.         | clinic | Controls | 48 | 6.7 (1.8)    | 6.5 (2.0)    | -0.1   | (-0.4, 0.2)    | 0.47   |
| Coronal range of motion (deg)                   | Gait | 2 minute walk | Research accel.         | clinic | PD       | 78 | 6.1 (1.7)    | 6.2 (1.9)    | 0.02   | (-0.3, 0.3)    | 0.89   |
| Double support (%GCT) average of both legs      | Gait | 2 minute walk | Research accel.         | clinic | Controls | 48 | 21.4 (3.1)   | 21.1 (3.6)   | -0.1   | (-0.5, 0.3)    | 0.5    |
| Double support (%GCT) average of both legs      | Gait | 2 minute walk | Research accel.         | clinic | PD       | 78 | 21.5 (2.8)   | 22.0 (3.0)   | 0.3    | (-0.1, 0.6)    | 0.2    |
| Double support (%GCT) average of both legs      | Gait | Dual task     | Research accel.         | clinic | Controls | 48 | 22.6 (3.3)   | 22.4 (3.8)   | -0.1   | (-0.6, 0.3)    | 0.61   |
| Double support (%GCT) average of both legs      | Gait | Dual task     | Research accel.         | clinic | PD       | 77 | 22.9 (3.3)   | 23.0 (3.5)   | 0.01   | (-0.3, 0.4)    | 0.94   |
| Double support (s)                              | Gait | 1 minute walk | Smartphone              | clinic | Controls | 44 | 0.3 (0.02)   | 0.3 (0.02)   | -0.2   | (-0.6, 0.1)    | 0.2    |
| Double support (s)                              | Gait | 1 minute walk | Smartphone              | clinic | PD       | 65 | 0.3 (0.02)   | 0.3 (0.02)   | -0.002 | (-0.5, 0.5)    | 0.99   |
| Double support (s)                              | Gait | 1 minute walk | Smartphone              | home   | Controls | 47 | 0.3 (0.03)   | 0.3 (0.03)   | 0.3    | (-0.2, 0.7)    | 0.21   |
| Double support (s)                              | Gait | 1 minute walk | Smartphone              | home   | PD       | 71 | 0.3 (0.02)   | 0.3 (0.03)   | 0.1    | (-0.2, 0.4)    | 0.4    |
| Double support (s) asymetry                     | Gait | 1 minute walk | Smartphone              | clinic | Controls | 43 | 1.1 (0.3)    | 0.9 (0.2)    | -0.2   | (-0.5, 0.1)    | 0.26   |
| Double support (s) asymetry                     | Gait | 1 minute walk | Smartphone              | clinic | PD       | 64 | 1.0 (0.4)    | 1.1 (0.5)    | 0.09   | (-0.2, 0.4)    | 0.59   |
| Double support (s) asymetry                     | Gait | 1 minute walk | Smartphone              | home   | Controls | 47 | 1.5 (0.5)    | 1.2 (0.5)    | -0.3   | (-0.5, -0.007) | 0.04   |
| Double support (s) asymetry                     | Gait | 1 minute walk | Smartphone              | home   | PD       | 69 | 1.8 (0.6)    | 1.8 (0.8)    | -0.05  | (-0.4, 0.3)    | 0.77   |
| Elevation at midswing (cm) average of both arms | Gait | 2 minute walk | Research accel.         | clinic | Controls | 48 | 1.4 (0.5)    | 1.4 (0.7)    | -0.007 | (-0.4, 0.4)    | 0.97   |
| Elevation at midswing (cm) average of both arms | Gait | 2 minute walk | Research accel.         | clinic | PD       | 78 | 1.5 (0.5)    | 1.6 (0.6)    | 0.2    | (-0.1, 0.5)    | 0.21   |
| Elevation at midswing (cm) average of both arms | Gait | Dual task     | Research accel.         | clinic | Controls | 48 | 1.3 (0.6)    | 1.2 (0.7)    | -0.05  | (-0.5, 0.4)    | 0.83   |
| Elevation at midswing (cm) average of both arms | Gait | Dual task     | Research accel.         | clinic | PD       | 77 | 1.4 (0.6)    | 1.5 (0.6)    | 0.3    | (-0.01, 0.6)   | 0.06   |
| Foot strike angle (deg) average of both legs    | Gait | 2 minute walk | Research accel.         | clinic | Controls | 47 | 25.6 (3.7)   | 25.1 (3.7)   | -0.1   | (-0.5, 0.2)    | 0.36   |
| Foot strike angle (deg) average of both legs    | Gait | 2 minute walk | Research accel.         | clinic | PD       | 78 | 22.8 (4.5)   | 21.0 (4.7)   | -0.8   | (-1.1, -0.4)   | <0.001 |
| Gait cycle duration (s)                         | Gait | 2 minute walk | Research accel.         | clinic | Controls | 48 | 1.1 (0.1)    | 1.1 (0.09)   | 0      | (-0.5, 0.5)    | 1      |
| Gait cycle duration (s)                         | Gait | 2 minute walk | Research accel.         | clinic | PD       | 78 | 1.1 (0.07)   | 1.1 (0.08)   | 0.3    | (-0.01, 0.7)   | 0.06   |
| Gait cycle duration (s)                         | Gait | Dual task     | Research accel.         | clinic | Controls | 48 | 1.1 (0.1)    | 1.1 (0.1)    | -0.1   | (-0.5, 0.3)    | 0.52   |
| Gait cycle duration (s)                         | Gait | Dual task     | Research accel.         | clinic | PD       | 77 | 1.2 (0.09)   | 1.2 (0.09)   | -0.03  | (-0.3, 0.2)    | 0.83   |
| Gait speed (m/s)                                | Gait | 1 minute walk | Smartphone              | clinic | Controls | 44 | 1.1 (0.2)    | 1.1 (0.2)    | 0.1    | (-0.2, 0.4)    | 0.5    |
| Gait speed (m/s)                                | Gait | 1 minute walk | Smartphone              | clinic | PD       | 67 | 1.0 (0.1)    | 0.9 (0.2)    | -0.6   | (-1.0, -0.1)   | 0.01   |
| Gait speed (m/s)                                | Gait | 1 minute walk | Smartphone              | home   | Controls | 46 | 1.0 (0.1)    | 1.0 (0.1)    | -0.1   | (-0.5, 0.2)    | 0.41   |
| Gait speed (m/s)                                | Gait | 1 minute walk | Smartphone              | home   | PD       | 71 | 0.9 (0.1)    | 0.9 (0.2)    | -0.1   | (-0.4, 0.2)    | 0.5    |
| Gait speed (m/s) average of both legs           | Gait | 2 minute walk | Research accel.         | clinic | Controls | 48 | 1.2 (0.2)    | 1.2 (0.1)    | -0.2   | (-0.6, 0.3)    | 0.48   |
| Gait speed (m/s) average of both legs           | Gait | 2 minute walk | Research accel.         | clinic | PD       | 78 | 1.1 (0.1)    | 1.0 (0.2)    | -0.7   | (-1.1, -0.3)   | <0.001 |
| Gait speed (m/s) average of both legs           | Gait | Dual task     | Research accel.         | clinic | Controls | 48 | 1.1 (0.2)    | 1.1 (0.2)    | -0.04  | (-0.5, 0.4)    | 0.86   |
| Gait speed (m/s) average of both legs           | Gait | Dual task     | Research accel.         | clinic | PD       | 77 | 1.0 (0.2)    | 1.0 (0.2)    | -0.3   | (-0.7, 0.06)   | 0.1    |
| Initial double support (s)                      | Gait | 1 minute walk | Smartphone              | clinic | Controls | 45 | 0.1 (0.01)   | 0.1 (0.01)   | -0.2   | (-0.5, 0.1)    | 0.27   |
| Initial double support (s)                      | Gait | 1 minute walk | Smartphone              | clinic | PD       | 65 | 0.1 (0.01)   | 0.1 (0.01)   | -0.08  | (-0.6, 0.4)    | 0.73   |
| Initial double support (s)                      | Gait | 1 minute walk | Smartphone              | home   | Controls | 47 | 0.1 (0.01)   | 0.1 (0.01)   | 0.2    | (-0.3, 0.6)    | 0.44   |
| Initial double support (s)                      | Gait | 1 minute walk | Smartphone              | home   | PD       | 71 | 0.1 (0.01)   | 0.1 (0.01)   | 0.2    | (-0.1, 0.5)    | 0.22   |
| Initial double support (s) asymetry             | Gait | 1 minute walk | Smartphone              | clinic | Controls | 42 | 5.8 (2.2)    | 5.5 (2.3)    | -0.06  | (-0.4, 0.3)    | 0.7    |
| Initial double support (s) asymetry             | Gait | 1 minute walk | Smartphone              | clinic | PD       | 66 | 6.2 (3.3)    | 7.9 (4.9)    | 0.4    | (-0.08, 0.9)   | 0.1    |
| Initial double support (s) asymetry             | Gait | 1 minute walk | Smartphone              | home   | Controls | 47 | 6.6 (2.0)    | 6.5 (3.0)    | -0.02  | (-0.3, 0.3)    | 0.92   |
| Initial double support (s) asymetry             | Gait | 1 minute walk | Smartphone              | home   | PD       | 70 | 8.8 (3.5)    | 8.3 (4.1)    | -0.09  | (-0.4, 0.2)    | 0.55   |
| Rater evaluation of gait                        | Gait | item 3.10     | Clinical rating         | clinic | Controls | 48 | 0.04 (0.2)   | 0.07 (0.3)   | 0.4    | (-0.2, 1.0)    | 0.25   |
| Rater evaluation of gait                        | Gait | item 3.10     | Clinical rating         | clinic | PD       | 78 | 0.7 (0.4)    | 0.7 (0.4)    | 0.06   | (-0.2, 0.3)    | 0.65   |
| Self-reported walking and balance               | Gait | item 2.12     | Self reported evalution | clinic | Controls | 48 | 0.02 (0.02)  | 0.04 (0.06)  | 0.08   | (-0.2, 0.3)    | 0.56   |
| Self-reported walking and balance               | Gait | item 2.12     | Self reported evalution | clinic | PD       | 78 | 0.3 (0.3)    | 0.5 (0.5)    | 0.4    | (0.04, 0.8)    | 0.03   |
| Single limb support (%GCT) average of both legs | Gait | 2 minute walk | Research accel.         | clinic | Controls | 48 | 39.3 (1.6)   | 39.4 (1.8)   | 0.1    | (-0.2, 0.5)    | 0.48   |
| Single limb support (%GCT) average of both legs | Gait | 2 minute walk | Research accel.         | clinic | PD       | 78 | 39.2 (1.4)   | 39.0 (1.5)   | -0.3   | (-0.7, 0.1)    | 0.18   |
| Single limb support (%GCT) average of both legs | Gait | Dual task     | Research accel.         | clinic | Controls | 48 | 24.8 (4.3)   | 24.0 (4.2)   | -0.3   | (-0.6, 0.08)   | 0.13   |
| Single limb support (%GCT) average of both legs | Gait | Dual task     | Research accel.         | clinic | PD       | 77 | 21.1 (5.2)   | 19.7 (5.4)   | -0.6   | (-1.0, -0.2)   | 0.003  |
| Single limb support (%GCT) average of both legs | Gait | Dual task     | Research accel.         | clinic | Controls | 48 | 38.7 (1.7)   | 38.8 (1.9)   | 0.1    | (-0.3, 0.6)    | 0.59   |



|                                                 |      |               |                 |        |          |    |             |             |        |               |        |
|-------------------------------------------------|------|---------------|-----------------|--------|----------|----|-------------|-------------|--------|---------------|--------|
| Single limb support (%GCT) average of both legs | Gait | Dual task     | Research accel. | clinic | PD       | 77 | 38.5 (1.6)  | 38.5 (1.7)  | -0.03  | (-0.4, 0.3)   | 0.88   |
| Single limb support (s)                         | Gait | 1 minute walk | Smartphone      | clinic | Controls | 44 | 0.4 (0.03)  | 0.4 (0.03)  | -0.09  | (-0.5, 0.3)   | 0.64   |
| Single limb support (s)                         | Gait | 1 minute walk | Smartphone      | clinic | PD       | 65 | 0.4 (0.03)  | 0.4 (0.03)  | -0.01  | (-0.4, 0.4)   | 0.95   |
| Single limb support (s)                         | Gait | 1 minute walk | Smartphone      | clinic | Controls | 43 | 4.0 (2.4)   | 5.2 (2.8)   | 0.4    | (-0.05, 0.8)  | 0.08   |
| Single limb support (s)                         | Gait | 1 minute walk | Smartphone      | clinic | PD       | 67 | 4.5 (1.6)   | 5.7 (2.2)   | 0.3    | (-0.04, 0.7)  | 0.08   |
| Single limb support (s)                         | Gait | 1 minute walk | Smartphone      | clinic | Controls | 43 | 0.6 (0.001) | 0.6 (0.001) | -0.4   | (-0.7, -0.07) | 0.02   |
| Single limb support (s)                         | Gait | 1 minute walk | Smartphone      | home   | Controls | 47 | 0.4 (0.04)  | 0.4 (0.04)  | 0.2    | (-0.2, 0.6)   | 0.26   |
| Single limb support (s)                         | Gait | 1 minute walk | Smartphone      | home   | PD       | 71 | 0.4 (0.03)  | 0.4 (0.04)  | -0.03  | (-0.4, 0.3)   | 0.86   |
| Single limb support (s)                         | Gait | 1 minute walk | Smartphone      | home   | Controls | 47 | 6.0 (2.8)   | 6.3 (3.9)   | 0.05   | (-0.3, 0.4)   | 0.77   |
| Single limb support (s)                         | Gait | 1 minute walk | Smartphone      | home   | PD       | 71 | 6.8 (2.4)   | 6.9 (2.9)   | 0.02   | (-0.2, 0.3)   | 0.87   |
| Stance (%GCT) average of both legs              | Gait | 2 minute walk | Research accel. | clinic | Controls | 48 | 60.7 (1.5)  | 60.5 (1.8)  | -0.1   | (-0.5, 0.3)   | 0.53   |
| Stance (%GCT) average of both legs              | Gait | 2 minute walk | Research accel. | clinic | PD       | 78 | 60.7 (1.4)  | 60.9 (1.5)  | 0.2    | (-0.1, 0.6)   | 0.22   |
| Stance (%GCT) average of both legs              | Gait | Dual task     | Research accel. | clinic | Controls | 48 | 61.3 (1.7)  | 61.2 (1.9)  | -0.1   | (-0.6, 0.4)   | 0.64   |
| Stance (%GCT) average of both legs              | Gait | Dual task     | Research accel. | clinic | PD       | 77 | 61.5 (1.6)  | 61.5 (1.7)  | 0.002  | (-0.4, 0.4)   | 0.99   |
| Stance (s)                                      | Gait | 1 minute walk | Smartphone      | clinic | Controls | 45 | 0.7 (0.05)  | 0.7 (0.05)  | -0.2   | (-0.6, 0.2)   | 0.29   |
| Stance (s)                                      | Gait | 1 minute walk | Smartphone      | clinic | PD       | 65 | 0.7 (0.05)  | 0.7 (0.05)  | -0.01  | (-0.5, 0.4)   | 0.95   |
| Stance (s)                                      | Gait | 1 minute walk | Smartphone      | home   | Controls | 47 | 0.7 (0.06)  | 0.7 (0.06)  | 0.2    | (-0.2, 0.6)   | 0.35   |
| Stance (s)                                      | Gait | 1 minute walk | Smartphone      | home   | PD       | 71 | 0.7 (0.06)  | 0.7 (0.06)  | 0.2    | (-0.1, 0.5)   | 0.27   |
| Stance (s) asymmetry                            | Gait | 1 minute walk | Smartphone      | clinic | Controls | 43 | 2.7 (1.4)   | 3.2 (1.6)   | 0.3    | (-0.1, 0.6)   | 0.16   |
| Stance (s) asymmetry                            | Gait | 1 minute walk | Smartphone      | clinic | PD       | 66 | 2.6 (0.9)   | 3.7 (1.3)   | 0.5    | (0.1, 0.8)    | 0.01   |
| Stance (s) asymmetry                            | Gait | 1 minute walk | Smartphone      | home   | Controls | 47 | 3.8 (1.7)   | 3.7 (2.3)   | -0.02  | (-0.4, 0.3)   | 0.91   |
| Stance (s) asymmetry                            | Gait | 1 minute walk | Smartphone      | home   | PD       | 71 | 4.5 (1.4)   | 4.8 (1.5)   | 0.07   | (-0.2, 0.3)   | 0.53   |
| Step duration (s)                               | Gait | 1 minute walk | Smartphone      | clinic | Controls | 44 | 0.5 (0.04)  | 0.5 (0.04)  | -0.2   | (-0.5, 0.2)   | 0.32   |
| Step duration (s)                               | Gait | 1 minute walk | Smartphone      | clinic | PD       | 65 | 0.6 (0.04)  | 0.6 (0.04)  | 0.009  | (-0.4, 0.4)   | 0.97   |
| Step duration (s)                               | Gait | 1 minute walk | Smartphone      | home   | Controls | 47 | 0.5 (0.05)  | 0.6 (0.05)  | 0.2    | (-0.2, 0.6)   | 0.33   |
| Step duration (s)                               | Gait | 1 minute walk | Smartphone      | home   | PD       | 71 | 0.6 (0.04)  | 0.6 (0.05)  | 0.09   | (-0.2, 0.4)   | 0.55   |
| Step duration (s) asymmetry                     | Gait | 1 minute walk | Smartphone      | clinic | Controls | 43 | 3.8 (1.7)   | 4.4 (2.2)   | 0.2    | (-0.2, 0.6)   | 0.29   |
| Step duration (s) asymmetry                     | Gait | 1 minute walk | Smartphone      | clinic | PD       | 65 | 4.0 (1.5)   | 5.7 (2.9)   | 0.6    | (0.09, 1.0)   | 0.02   |
| Step duration (s) asymmetry                     | Gait | 1 minute walk | Smartphone      | home   | Controls | 47 | 5.3 (2.6)   | 5.1 (2.9)   | -0.05  | (-0.4, 0.2)   | 0.74   |
| Step duration (s) asymmetry                     | Gait | 1 minute walk | Smartphone      | home   | PD       | 71 | 6.9 (2.3)   | 6.9 (2.6)   | -0.001 | (-0.2, 0.2)   | 1      |
| Step duration (s) average of both legs          | Gait | 2 minute walk | Research accel. | clinic | Controls | 48 | 0.5 (0.05)  | 0.5 (0.04)  | 0.01   | (-0.5, 0.5)   | 0.95   |
| Step duration (s) average of both legs          | Gait | 2 minute walk | Research accel. | clinic | PD       | 78 | 0.6 (0.04)  | 0.6 (0.04)  | 0.3    | (-0.009, 0.7) | 0.05   |
| Step duration (s) average of both legs          | Gait | Dual task     | Research accel. | clinic | Controls | 48 | 0.6 (0.05)  | 0.6 (0.05)  | -0.1   | (-0.5, 0.3)   | 0.49   |
| Step duration (s) average of both legs          | Gait | Dual task     | Research accel. | clinic | PD       | 77 | 0.6 (0.05)  | 0.6 (0.05)  | -0.03  | (-0.3, 0.2)   | 0.85   |
| Step length (m)                                 | Gait | 1 minute walk | Smartphone      | clinic | Controls | 44 | 0.6 (0.08)  | 0.6 (0.08)  | 0.2    | (-0.08, 0.5)  | 0.15   |
| Step length (m)                                 | Gait | 1 minute walk | Smartphone      | clinic | PD       | 67 | 0.6 (0.06)  | 0.5 (0.09)  | -0.6   | (-1.1, -0.2)  | 0.008  |
| Step length (m)                                 | Gait | 1 minute walk | Smartphone      | home   | Controls | 46 | 0.5 (0.06)  | 0.5 (0.06)  | -0.05  | (-0.4, 0.3)   | 0.74   |
| Step length (m)                                 | Gait | 1 minute walk | Smartphone      | home   | PD       | 71 | 0.5 (0.06)  | 0.5 (0.07)  | 0.04   | (-0.3, 0.3)   | 0.77   |
| Step length (m) asymmetry                       | Gait | 1 minute walk | Smartphone      | clinic | Controls | 43 | 5.9 (1.8)   | 5.7 (2.6)   | -0.04  | (-0.4, 0.3)   | 0.81   |
| Step length (m) asymmetry                       | Gait | 1 minute walk | Smartphone      | clinic | PD       | 66 | 6.9 (4.1)   | 9.1 (5.4)   | 0.4    | (-0.07, 0.9)  | 0.09   |
| Step length (m) asymmetry                       | Gait | 1 minute walk | Smartphone      | home   | Controls | 46 | 7.9 (3.2)   | 7.6 (3.7)   | -0.05  | (-0.4, 0.3)   | 0.73   |
| Step length (m) asymmetry                       | Gait | 1 minute walk | Smartphone      | home   | PD       | 69 | 9.1 (3.0)   | 10.2 (4.5)  | 0.2    | (-0.1, 0.5)   | 0.21   |
| Stride duration                                 | Gait | 1 minute walk | Smartphone      | clinic | Controls | 45 | 1.1 (0.08)  | 1.1 (0.08)  | -0.1   | (-0.4, 0.2)   | 0.52   |
| Stride duration                                 | Gait | 1 minute walk | Smartphone      | clinic | PD       | 65 | 1.1 (0.08)  | 1.1 (0.08)  | 0.003  | (-0.4, 0.5)   | 0.99   |
| Stride duration                                 | Gait | 1 minute walk | Smartphone      | home   | Controls | 47 | 1.1 (0.09)  | 1.1 (0.1)   | 0.2    | (-0.2, 0.5)   | 0.31   |
| Stride duration                                 | Gait | 1 minute walk | Smartphone      | home   | PD       | 71 | 1.1 (0.09)  | 1.1 (0.09)  | 0.08   | (-0.2, 0.4)   | 0.62   |
| Stride duration asymmetry                       | Gait | 1 minute walk | Smartphone      | clinic | Controls | 43 | 0.9 (0.3)   | 0.8 (0.4)   | -0.1   | (-0.5, 0.2)   | 0.46   |
| Stride duration asymmetry                       | Gait | 1 minute walk | Smartphone      | clinic | PD       | 66 | 0.7 (0.2)   | 1.2 (0.9)   | 0.8    | (0.2, 1.4)    | 0.008  |
| Stride duration asymmetry                       | Gait | 1 minute walk | Smartphone      | home   | Controls | 47 | 1.0 (0.4)   | 0.8 (0.4)   | -0.2   | (-0.5, 0.1)   | 0.24   |
| Stride duration asymmetry                       | Gait | 1 minute walk | Smartphone      | home   | PD       | 70 | 1.3 (0.4)   | 1.2 (0.5)   | -0.07  | (-0.3, 0.2)   | 0.61   |
| Stride length (m)                               | Gait | 1 minute walk | Smartphone      | clinic | Controls | 44 | 1.1 (0.1)   | 1.2 (0.1)   | 0.2    | (-0.09, 0.5)  | 0.16   |
| Stride length (m)                               | Gait | 1 minute walk | Smartphone      | clinic | PD       | 67 | 1.1 (0.1)   | 1.0 (0.2)   | -0.7   | (-1.1, -0.2)  | 0.007  |
| Stride length (m)                               | Gait | 1 minute walk | Smartphone      | home   | Controls | 46 | 1.1 (0.1)   | 1.0 (0.1)   | -0.06  | (-0.4, 0.3)   | 0.72   |
| Stride length (m)                               | Gait | 1 minute walk | Smartphone      | home   | PD       | 71 | 1.0 (0.1)   | 1.0 (0.1)   | 0.05   | (-0.2, 0.3)   | 0.73   |
| Stride length (m) asymmetry                     | Gait | 1 minute walk | Smartphone      | clinic | Controls | 42 | 1.2 (0.2)   | 0.9 (0.2)   | -0.2   | (-0.5, 0.03)  | 0.08   |
| Stride length (m) asymmetry                     | Gait | 1 minute walk | Smartphone      | clinic | PD       | 65 | 1.1 (0.4)   | 1.3 (0.4)   | 0.1    | (-0.1, 0.4)   | 0.3    |
| Stride length (m) asymmetry                     | Gait | 1 minute walk | Smartphone      | home   | Controls | 46 | 1.8 (0.7)   | 1.5 (0.8)   | -0.2   | (-0.5, 0.1)   | 0.2    |
| Stride length (m) asymmetry                     | Gait | 1 minute walk | Smartphone      | home   | PD       | 70 | 2.3 (0.6)   | 2.0 (1.0)   | -0.2   | (-0.5, 0.2)   | 0.27   |
| Stride length (m) average of both legs          | Gait | 2 minute walk | Research accel. | clinic | Controls | 48 | 1.2 (0.1)   | 1.2 (0.1)   | -0.09  | (-0.5, 0.3)   | 0.65   |
| Stride length (m) average of both legs          | Gait | 2 minute walk | Research accel. | clinic | PD       | 78 | 1.2 (0.1)   | 1.2 (0.1)   | -0.8   | (-1.2, -0.4)  | <0.001 |
| Stride length (m) average of both legs          | Gait | Dual task     | Research accel. | clinic | Controls | 48 | 1.2 (0.1)   | 1.2 (0.1)   | -0.04  | (-0.5, 0.4)   | 0.85   |
| Stride length (m) average of both legs          | Gait | Dual task     | Research accel. | clinic | PD       | 77 | 1.1 (0.1)   | 1.1 (0.1)   | -0.5   | (-0.8, -0.1)  | 0.008  |
| Swing (%GCT) average of both legs               | Gait | 2 minute walk | Research accel. | clinic | Controls | 48 | 39.3 (1.5)  | 39.5 (1.8)  | 0.1    | (-0.3, 0.5)   | 0.53   |
| Swing (%GCT) average of both legs               | Gait | 2 minute walk | Research accel. | clinic | PD       | 78 | 39.3 (1.4)  | 39.1 (1.5)  | -0.2   | (-0.6, 0.1)   | 0.22   |
| Swing (%GCT) average of both legs               | Gait | Dual task     | Research accel. | clinic | Controls | 48 | 38.7 (1.7)  | 38.8 (1.9)  | 0.1    | (-0.4, 0.6)   | 0.64   |
| Swing (%GCT) average of both legs               | Gait | Dual task     | Research accel. | clinic | PD       | 77 | 38.5 (1.6)  | 38.5 (1.7)  | -0.002 | (-0.4, 0.4)   | 0.99   |
| Swing (s)                                       | Gait | 1 minute walk | Smartphone      | clinic | Controls | 44 | 0.4 (0.03)  | 0.4 (0.03)  | -0.05  | (-0.4, 0.3)   | 0.76   |
| Swing (s)                                       | Gait | 1 minute walk | Smartphone      | clinic | PD       | 65 | 0.4 (0.03)  | 0.4 (0.03)  | 0.01   | (-0.4, 0.5)   | 0.96   |
| Swing (s)                                       | Gait | 1 minute walk | Smartphone      | home   | Controls | 47 | 0.4 (0.03)  | 0.4 (0.04)  | 0.3    | (-0.01, 0.7)  | 0.06   |
| Swing (s)                                       | Gait | 1 minute walk | Smartphone      | home   | PD       | 71 | 0.4 (0.03)  | 0.4 (0.04)  | -0.02  | (-0.4, 0.3)   | 0.93   |
| Swing (s) asymmetry                             | Gait | 1 minute walk | Smartphone      | clinic | Controls | 43 | 3.7 (1.7)   | 5.1 (2.8)   | 0.4    | (-0.02, 0.8)  | 0.06   |
| Swing (s) asymmetry                             | Gait | 1 minute walk | Smartphone      | clinic | PD       | 66 | 4.0 (1.4)   | 5.8 (2.5)   | 0.5    | (0.09, 0.9)   | 0.02   |

|                                                     |        |                    |                          |        |          |    |              |               |        |               |        |
|-----------------------------------------------------|--------|--------------------|--------------------------|--------|----------|----|--------------|---------------|--------|---------------|--------|
| Swing (s) asymmetry                                 | Gait   | 1 minute walk      | Smartphone               | home   | Controls | 47 | 5.8 (2.6)    | 5.9 (3.4)     | 0.02   | (-0.3, 0.3)   | 0.9    |
| Swing (s) asymmetry                                 | Gait   | 1 minute walk      | Smartphone               | home   | PD       | 71 | 7.1 (2.5)    | 7.5 (3.0)     | 0.09   | (-0.2, 0.3)   | 0.47   |
| Terminal double support (%GCT) average of both legs | Gait   | 2 minute walk      | Research accel.          | clinic | Controls | 48 | 10.7 (1.5)   | 10.6 (1.8)    | -0.1   | (-0.5, 0.3)   | 0.54   |
| Terminal double support (%GCT) average of both legs | Gait   | 2 minute walk      | Research accel.          | clinic | PD       | 78 | 10.8 (1.4)   | 11.0 (1.5)    | 0.2    | (-0.1, 0.6)   | 0.21   |
| Terminal double support (%GCT) average of both legs | Gait   | Dual task          | Research accel.          | clinic | Controls | 48 | 11.3 (1.7)   | 11.2 (1.9)    | -0.1   | (-0.6, 0.3)   | 0.6    |
| Terminal double support (%GCT) average of both legs | Gait   | Dual task          | Research accel.          | clinic | PD       | 77 | 11.4 (1.7)   | 11.5 (1.8)    | 0.2    | (-0.2, 0.5)   | 0.42   |
| Terminal double support (s)                         | Gait   | 1 minute walk      | Smartphone               | clinic | Controls | 44 | 0.1 (0.01)   | 0.1 (0.01)    | -0.2   | (-0.6, 0.1)   | 0.22   |
| Terminal double support (s)                         | Gait   | 1 minute walk      | Smartphone               | clinic | PD       | 65 | 0.1 (0.01)   | 0.1 (0.01)    | 0.04   | (-0.5, 0.6)   | 0.89   |
| Terminal double support (s)                         | Gait   | 1 minute walk      | Smartphone               | home   | Controls | 47 | 0.1 (0.01)   | 0.1 (0.01)    | 0.2    | (-0.2, 0.6)   | 0.26   |
| Terminal double support (s)                         | Gait   | 1 minute walk      | Smartphone               | home   | PD       | 71 | 0.1 (0.01)   | 0.1 (0.01)    | 0.09   | (-0.2, 0.4)   | 0.55   |
| Terminal double support (s) asymmetry               | Gait   | 1 minute walk      | Smartphone               | clinic | Controls | 43 | 5.2 (2.4)    | 5.2 (2.4)     | -0.02  | (-0.3, 0.3)   | 0.91   |
| Terminal double support (s) asymmetry               | Gait   | 1 minute walk      | Smartphone               | clinic | PD       | 65 | 5.7 (3.4)    | 8.3 (5.8)     | 0.8    | (0.2, 1.4)    | 0.01   |
| Terminal double support (s) asymmetry               | Gait   | 1 minute walk      | Smartphone               | home   | Controls | 47 | 6.1 (1.7)    | 6.5 (2.6)     | 0.07   | (-0.2, 0.4)   | 0.64   |
| Terminal double support (s) asymmetry               | Gait   | 1 minute walk      | Smartphone               | home   | PD       | 68 | 8.2 (3.4)    | 8.3 (3.8)     | 0.03   | (-0.2, 0.3)   | 0.84   |
| Toe off angle (deg) average of both legs            | Gait   | 2 minute walk      | Research accel.          | clinic | Controls | 48 | 36.7 (2.7)   | 37.1 (3.1)    | 0.2    | (-1.0, 0.5)   | 0.29   |
| Toe off angle (deg) average of both legs            | Gait   | 2 minute walk      | Research accel.          | clinic | PD       | 78 | 35.9 (3.6)   | 34.7 (4.1)    | -0.6   | (-1.0, -0.2)  | 0.004  |
| Toe off angle (deg) average of both legs            | Gait   | Dual task          | Research accel.          | clinic | Controls | 48 | 35.7 (2.9)   | 36.1 (3.3)    | 0.2    | (-0.2, 0.5)   | 0.28   |
| Toe off angle (deg) average of both legs            | Gait   | Dual task          | Research accel.          | clinic | PD       | 77 | 34.9 (3.8)   | 33.9 (4.1)    | -0.5   | (-0.9, -0.1)  | 0.01   |
| Toe out angle (deg) average of both legs            | Gait   | 2 minute walk      | Research accel.          | clinic | Controls | 48 | 7.2 (5.0)    | 8.8 (5.4)     | 0.3    | (-0.007, 0.6) | 0.05   |
| Toe out angle (deg) average of both legs            | Gait   | 2 minute walk      | Research accel.          | clinic | PD       | 78 | 7.7 (5.9)    | 8.1 (6.1)     | 0.07   | (-0.2, 0.4)   | 0.62   |
| Toe out angle (deg) average of both legs            | Gait   | Dual task          | Research accel.          | clinic | Controls | 48 | 7.3 (5.1)    | 9.0 (5.7)     | 0.3    | (-0.001, 0.6) | 0.05   |
| Toe out angle (deg) average of both legs            | Gait   | Dual task          | Research accel.          | clinic | PD       | 77 | 8.1 (6.1)    | 8.6 (6.4)     | 0.09   | (-0.2, 0.4)   | 0.52   |
| Rater evaluation of speech                          | Speech | item 3.01          | MDS - UPDRS              | clinic | PD       | 78 | 0.5 (0.4)    | 0.8 (0.5)     | 0.7    | (0.3, 1.0)    | <0.001 |
| Rater evaluation of speech                          | Speech | item 3.01          | MDS - UPDRS              | clinic | Controls | 48 | 0 (0)        | 0 (0)         |        |               |        |
| Self-reported problem with speech                   | Speech | item 2.01          | MDS - UPDRS              | clinic | PD       | 78 | 0.4 (0.6)    | 0.6 (0.6)     | 0.3    | (-0.005, 0.7) | 0.05   |
| Self-reported problem with speech                   | Speech | item 2.01          | MDS - UPDRS              | clinic | Controls | 48 | 0.02 (0.07)  | -0.004 (0.07) | -0.1   | (-0.3, 0.1)   | 0.41   |
| Speech composite                                    | Speech | Phonation, reading | Smartphone               | clinic | Controls | 46 | -0.1 (1.4)   | -0.3 (1.4)    | -0.08  | (-0.3, 0.1)   | 0.49   |
| Speech composite                                    | Speech | Phonation, reading | Smartphone               | clinic | PD       | 70 | 1.5 (2.0)    | 1.6 (2.2)     | 0.03   | (-0.3, 0.3)   | 0.85   |
| Speech composite                                    | Speech | Phonation, reading | Smartphone               | home   | Controls | 46 | 0.09 (1.3)   | 0.2 (1.4)     | 0.06   | (-0.2, 0.3)   | 0.67   |
| Speech composite                                    | Speech | Phonation, reading | Smartphone               | home   | PD       | 75 | 1.2 (1.9)    | 1.7 (2.0)     | 0.3    | (0.02, 0.5)   | 0.03   |
| Log(pause time), zscored                            | Speech | Reading            | Smartphone               | clinic | Controls | 46 | -0.1 (0.6)   | 0.05 (0.7)    | 0.1    | (-0.2, 0.4)   | 0.37   |
| Log(pause time), zscored                            | Speech | Reading            | Smartphone               | clinic | PD       | 70 | 0.2 (0.8)    | 0.2 (0.8)     | 0.04   | (-0.2, 0.3)   | 0.72   |
| Log(pause time), zscored                            | Speech | Reading            | Smartphone               | home   | Controls | 46 | -0.4 (0.5)   | 0.003 (0.8)   | 0.3    | (-0.009, 0.6) | 0.06   |
| Log(pause time), zscored                            | Speech | Reading            | Smartphone               | home   | PD       | 75 | 0.03 (0.7)   | 0.4 (0.7)     | 0.4    | (0.2, 0.5)    | <0.001 |
| Monopitch (semitone range), zscored                 | Speech | Reading            | Smartphone               | clinic | Controls | 46 | -0.06 (0.8)  | 0.1 (0.8)     | 0.2    | (-0.08, 0.4)  | 0.2    |
| Monopitch (semitone range), zscored                 | Speech | Reading            | Smartphone               | clinic | PD       | 70 | -0.7 (0.9)   | -0.6 (0.9)    | 0.1    | (-0.1, 0.4)   | 0.38   |
| Monopitch (semitone range), zscored                 | Speech | Reading            | Smartphone               | home   | Controls | 46 | -0.1 (0.7)   | 0.08 (0.8)    | 0.2    | (-0.01, 0.5)  | 0.06   |
| Monopitch (semitone range), zscored                 | Speech | Reading            | Smartphone               | home   | PD       | 75 | -0.7 (0.9)   | -0.6 (1.0)    | 0.09   | (-0.2, 0.4)   | 0.51   |
| MFCC2, zscored                                      | Speech | Phonation          | Smartphone               | clinic | Controls | 46 | 0.2 (0.8)    | 0.1 (0.8)     | -0.005 | (-0.3, 0.3)   | 0.97   |
| MFCC2, zscored                                      | Speech | Phonation          | Smartphone               | clinic | PD       | 70 | -0.3 (0.6)   | -0.3 (0.9)    | -0.07  | (-0.3, 0.2)   | 0.62   |
| MFCC2, zscored                                      | Speech | Phonation          | Smartphone               | home   | Controls | 46 | -0.1 (0.7)   | -0.09 (0.8)   | 0.02   | (-0.3, 0.3)   | 0.91   |
| MFCC2, zscored                                      | Speech | Phonation          | Smartphone               | home   | PD       | 75 | -0.09 (0.9)  | -0.2 (1.1)    | -0.1   | (-0.4, 0.2)   | 0.36   |
| Cepstral peak prominence, zscored                   | Speech | Phonation          | Smartphone               | clinic | Controls | 46 | -0.09 (0.7)  | 0.1 (0.8)     | 0.2    | (-0.08, 0.5)  | 0.16   |
| Cepstral peak prominence, zscored                   | Speech | Phonation          | Smartphone               | clinic | PD       | 70 | -0.4 (1.0)   | -0.4 (1.3)    | -0.01  | (-0.4, 0.3)   | 0.94   |
| Cepstral peak prominence, zscored                   | Speech | Phonation          | Smartphone               | home   | Controls | 46 | -0.1 (0.8)   | -0.07 (0.9)   | 0.04   | (-0.3, 0.4)   | 0.82   |
| Cepstral peak prominence, zscored                   | Speech | Phonation          | Smartphone               | home   | PD       | 75 | -0.3 (0.9)   | -0.5 (1.1)    | -0.1   | (-0.4, 0.1)   | 0.28   |
| Turn duration (s)                                   | Turns  | 1 minute walk      | Smartphone               | home   | Controls | 47 | 2.2 (0.3)    | 2.2 (0.5)     | 0.04   | (-0.3, 0.4)   | 0.81   |
| Turn duration (s)                                   | Turns  | 1 minute walk      | Smartphone               | home   | PD       | 77 | 2.3 (0.3)    | 2.4 (0.4)     | 0.09   | (-0.2, 0.3)   | 0.48   |
| Turn velocity (deg/s)                               | Turns  | 2 minute walk      | Research accel.          | clinic | Controls | 48 | 201.3 (37.2) | 206.5 (46.7)  | 0.2    | (-0.2, 0.6)   | 0.29   |
| Turn velocity (deg/s)                               | Turns  | 2 minute walk      | Research accel.          | clinic | PD       | 78 | 164.0 (26.4) | 153.6 (31.4)  | -0.6   | (-1.0, -0.2)  | 0.004  |
| Turn velocity (deg/s)                               | Turns  | Dual task          | Research accel.          | clinic | Controls | 48 | 193.0 (34.2) | 197.7 (42.9)  | 0.2    | (-0.2, 0.6)   | 0.36   |
| Turn velocity (deg/s)                               | Turns  | Dual task          | Research accel.          | clinic | PD       | 78 | 154.0 (27.8) | 144.8 (29.7)  | -0.5   | (-0.9, -0.1)  | 0.008  |
| Turns angle (deg)                                   | Turns  | 2 minute walk      | Research accel.          | clinic | Controls | 48 | 182.5 (3.1)  | 182.5 (3.1)   | 0.001  | (-0.3, 0.3)   | 0.93   |
| Turns angle (deg)                                   | Turns  | 2 minute walk      | Research accel.          | clinic | PD       | 78 | 178.3 (4.6)  | 175.6 (6.2)   | -0.5   | (-0.8, -0.1)  | 0.005  |
| Turns angle (deg)                                   | Turns  | Dual task          | Research accel.          | clinic | Controls | 48 | 180.2 (3.8)  | 181.2 (4.5)   | 0.1    | (-0.2, 0.5)   | 0.43   |
| Turns angle (deg)                                   | Turns  | Dual task          | Research accel.          | clinic | PD       | 78 | 175.6 (8.4)  | 175.0 (8.4)   | -0.07  | (-0.3, 0.2)   | 0.54   |
| Tremor (%)                                          | Tremor | passive            | Smartwatch               | home   | Controls | 25 | 0.7 (0.6)    | 0.7 (0.5)     | -0.1   | (-0.4, 0.2)   | 0.57   |
| Tremor (%)                                          | Tremor | passive            | Smartwatch               | home   | PD       | 57 | 19.3 (18.0)  | 25.6 (21.4)   | 0.7    | (0.3, 1.0)    | <0.001 |
| Self-reported problems with tremor                  | Tremor | item 2.10          | Self reported evaluation | clinic | Controls | 48 | 0 (0)        | 0 (0)         |        |               |        |
| Self-reported problems with tremor                  | Tremor | item 2.10          | Self reported evaluation | clinic | PD       | 78 | 1.2 (0.5)    | 1.4 (0.6)     | 0.4    | (0.07, 0.7)   | 0.02   |
| Rater evaluation of constancy of tremor             | Tremor | item 3.18          | Clinical rating          | clinic | Controls | 48 | -0.001 (0)   | 0.01 (0.06)   | 0.2    | (-0.2, 0.6)   | 0.26   |
| Rater evaluation of constancy of tremor             | Tremor | item 3.18          | Clinical rating          | clinic | PD       | 78 | 1.6 (1.4)    | 2.0 (1.5)     | 0.5    | (0.2, 0.8)    | 0.001  |
| MDS - UPDRS part I total                            |        |                    | MDS - UPDRS              | clinic | Controls | 48 | 2.8 (2.5)    | 2.9 (2.8)     | 0.05   | (-0.3, 0.4)   | 0.75   |
| MDS - UPDRS part I total                            |        |                    | MDS - UPDRS              | clinic | PD       | 78 | 5.4 (2.7)    | 6.2 (3.4)     | 0.3    | (-0.06, 0.7)  | 0.1    |
| MDS - UPDRS part II total                           |        |                    | MDS - UPDRS              | clinic | Controls | 48 | 0.4 (0.8)    | 0.4 (0.8)     | -0.04  | (-0.4, 0.3)   | 0.79   |
| MDS - UPDRS part II total                           |        |                    | MDS - UPDRS              | clinic | PD       | 78 | 5.4 (3.5)    | 7.7 (4.3)     | 1.2    | (0.7, 1.6)    | <0.001 |
| MDS - UPDRS part III total                          |        |                    | MDS - UPDRS              | clinic | Controls | 48 | 2.7 (2.6)    | 2.9 (3.2)     | 0.1    | (-0.3, 0.5)   | 0.57   |
| MDS - UPDRS part III total                          |        |                    | MDS - UPDRS              | clinic | PD       | 78 | 23.6 (9.6)   | 29.7 (11.2)   | 1.2    | (0.7, 1.6)    | <0.001 |
| MDS - UPDRS part I + II + III total                 |        |                    | MDS - UPDRS              | clinic | Controls | 48 | 6.0 (4.1)    | 6.3 (4.6)     | 0.1    | (-0.3, 0.5)   | 0.62   |
| MDS - UPDRS part I + II + III total                 |        |                    | MDS - UPDRS              | clinic | PD       | 78 | 34.6 (11.5)  | 43.9 (14.4)   | 1.3    | (0.8, 1.8)    | <0.001 |

Supplementary Table 3: Empirical Values Analysis Results. Std. Diff., Standardized Difference; CI, Confidence Interval. MDS-UPDRS, the Movement Disorder Society-Sponsored Revision of the Unified Parkinson's Disease Rating Scale. SDMT, Symbol-Digit Modalities Test. VSWM, Visuospatial Working Memory Task. GCT, Gait Cycle Time. PD, Parkinson's Disease.

| Feature                                            | Domain    | Task               | Device          | Location | Cohort   | n  | Month 0<br>(Mean & SD) | Month 12<br>(Mean & SD) | Std. Diff | Std. Diff 95% CI |
|----------------------------------------------------|-----------|--------------------|-----------------|----------|----------|----|------------------------|-------------------------|-----------|------------------|
| Steps                                              | Activity  | Passive            | Smartwatch      | home     | PD       | 10 | 3052.6 (1306.3)        | 2331.2 (2010.2)         | -0.5      | (-2.0, 0.2)      |
| Steps per hour                                     | Activity  | Passive            | Smartwatch      | home     | PD       | 10 | 197.9 (82.4)           | 159.6 (142.6)           | -0.4      | (-2.5, 0.2)      |
| Finemotor dominant hand                            | Cognitive | Finemotor          | Smartphone      | clinic   | Controls | 42 | 5.0 (1.4)              | 6.0 (1.5)               | 0.8       | (-1.1, -0.4)     |
| Finemotor dominant hand                            | Cognitive | Finemotor          | Smartphone      | clinic   | PD       | 44 | 4.0 (1.4)              | 4.5 (1.8)               | 0.3       | (0.5, 1.2)       |
| Finemotor dominant hand                            | Cognitive | Finemotor          | Smartphone      | home     | Controls | 34 | 5.4 (1.2)              | 6.1 (1.3)               | 0.5       | (-0.8, -0.3)     |
| Finemotor dominant hand                            | Cognitive | Finemotor          | Smartphone      | home     | PD       | 33 | 3.9 (1.8)              | 4.5 (2.0)               | 0.4       | (0.1, 0.9)       |
| Finemotor less affected side                       | Cognitive | Finemotor          | Smartphone      | clinic   | PD       | 44 | 4.0 (1.5)              | 4.8 (1.8)               | 0.6       | (0.5, 1.2)       |
| Finemotor less affected side                       | Cognitive | Finemotor          | Smartphone      | home     | PD       | 33 | 4.2 (1.6)              | 4.8 (1.7)               | 0.5       | (0.3, 1.0)       |
| Finemotor more affected side                       | Cognitive | Finemotor          | Smartphone      | clinic   | PD       | 44 | 3.7 (1.5)              | 3.8 (1.6)               | 0.02      | (0.6, 1.1)       |
| Finemotor more affected side                       | Cognitive | Finemotor          | Smartphone      | home     | PD       | 33 | 3.7 (1.6)              | 3.5 (1.7)               | -0.1      | (0.1, 0.8)       |
| Finemotor nondominant hand                         | Cognitive | Finemotor          | Smartphone      | clinic   | Controls | 43 | 4.4 (1.5)              | 5.6 (1.5)               | 0.9       | (-1.3, -0.5)     |
| Finemotor nondominant hand                         | Cognitive | Finemotor          | Smartphone      | clinic   | PD       | 44 | 3.7 (1.5)              | 4.1 (1.7)               | 0.3       | (0.6, 1.3)       |
| Finemotor nondominant hand                         | Cognitive | Finemotor          | Smartphone      | home     | Controls | 34 | 4.5 (1.4)              | 5.2 (1.3)               | 0.6       | (-0.6, -0.09)    |
| Finemotor nondominant hand                         | Cognitive | Finemotor          | Smartphone      | home     | PD       | 33 | 3.9 (1.4)              | 3.9 (1.6)               | 0         | (0.3, 0.9)       |
| Fingertapping dominant hand                        | Cognitive | Fingertapping      | Smartphone      | clinic   | Controls | 43 | 134.1 (42.6)           | 158.1 (35.2)            | 0.5       | (-1.4, -0.5)     |
| Fingertapping dominant hand                        | Cognitive | Fingertapping      | Smartphone      | clinic   | PD       | 47 | 109.7 (41.5)           | 153.0 (50.8)            | 0.9       | (0.2, 0.9)       |
| Fingertapping dominant hand                        | Cognitive | Fingertapping      | Smartphone      | home     | Controls | 34 | 142.9 (40.0)           | 160.3 (35.1)            | 0.6       | (-1.1, 0.006)    |
| Fingertapping dominant hand                        | Cognitive | Fingertapping      | Smartphone      | home     | PD       | 34 | 129.4 (45.9)           | 155.2 (45.8)            | 0.5       | (0.3, 0.9)       |
| Fingertapping less affected side                   | Cognitive | Fingertapping      | Smartphone      | clinic   | PD       | 47 | 115.9 (43.7)           | 147.7 (51.6)            | 0.7       | (0.2, 0.9)       |
| Fingertapping less affected side                   | Cognitive | Fingertapping      | Smartphone      | home     | PD       | 34 | 131.3 (48.6)           | 155.9 (44.9)            | 0.6       | (0.7, 1.4)       |
| Fingertapping more affected side                   | Cognitive | Fingertapping      | Smartphone      | clinic   | PD       | 47 | 104.1 (38.1)           | 147.5 (48.9)            | 0.9       | (0.2, 0.9)       |
| Fingertapping more affected side                   | Cognitive | Fingertapping      | Smartphone      | home     | PD       | 34 | 120.4 (50.3)           | 145.8 (48.7)            | 0.5       | (0.3, 1.0)       |
| Fingertapping nondominant hand                     | Cognitive | Fingertapping      | Smartphone      | clinic   | Controls | 43 | 127.0 (39.7)           | 149.6 (34.9)            | 0.5       | (-1.7, -0.6)     |
| Fingertapping nondominant hand                     | Cognitive | Fingertapping      | Smartphone      | clinic   | PD       | 47 | 110.3 (41.4)           | 142.2 (49.1)            | 0.7       | (0.2, 0.8)       |
| Fingertapping nondominant hand                     | Cognitive | Fingertapping      | Smartphone      | home     | Controls | 34 | 128.7 (36.6)           | 154.0 (35.6)            | 0.9       | (-1.8, -0.5)     |
| Fingertapping nondominant hand                     | Cognitive | Fingertapping      | Smartphone      | home     | PD       | 34 | 122.3 (53.1)           | 146.4 (47.9)            | 0.6       | (0.7, 1.4)       |
| Intertap intervals (ms) more affected side         | Cognitive | Intertap intervals | Smartphone      | clinic   | PD       | 45 | 220.4 (94.8)           | 146.9 (99.7)            | -0.5      | (-0.5, 0.1)      |
| Intertap intervals (ms) more affected side         | Cognitive | Intertap intervals | Smartphone      | home     | PD       | 32 | 191.3 (95.6)           | 167.4 (93.4)            | -0.2      | (-0.8, -0.2)     |
| Intertap intervals (ms) less affected side         | Cognitive | Intertap intervals | Smartphone      | clinic   | PD       | 45 | 201.6 (91.5)           | 136.7 (96.6)            | -0.5      | (-0.6, 0.03)     |
| Intertap intervals (ms) less affected side         | Cognitive | Intertap intervals | Smartphone      | home     | PD       | 32 | 167.2 (95.3)           | 127.0 (98.7)            | -0.4      | (-0.7, 0.03)     |
| Intertap intervals (ms) dominant hand              | Cognitive | Intertap intervals | Smartphone      | clinic   | Controls | 46 | 160.7 (82.9)           | 135.5 (71.0)            | -0.2      | (0.05, 0.7)      |
| Intertap intervals (ms) dominant hand              | Cognitive | Intertap intervals | Smartphone      | clinic   | PD       | 46 | 209.3 (98.3)           | 140.2 (98.7)            | -0.5      | (-0.6, 0.07)     |
| Intertap intervals (ms) dominant hand              | Cognitive | Intertap intervals | Smartphone      | home     | Controls | 34 | 149.3 (72.0)           | 109.7 (58.9)            | -0.5      | (0.2, 0.7)       |
| Intertap intervals (ms) dominant hand              | Cognitive | Intertap intervals | Smartphone      | home     | PD       | 31 | 165.5 (83.6)           | 143.2 (90.5)            | -0.2      | (-0.9, -0.2)     |
| Intertap intervals (ms) nondominant hand           | Cognitive | Intertap intervals | Smartphone      | clinic   | Controls | 44 | 149.5 (79.8)           | 130.2 (80.1)            | -0.2      | (-0.04, 0.6)     |
| Intertap intervals (ms) nondominant hand           | Cognitive | Intertap intervals | Smartphone      | clinic   | PD       | 47 | 227.5 (103.5)          | 152.1 (112.4)           | -0.6      | (-0.5, 0.08)     |
| Intertap intervals (ms) nondominant hand           | Cognitive | Intertap intervals | Smartphone      | home     | Controls | 34 | 149.7 (62.1)           | 126.4 (74.8)            | -0.3      | (0.1, 0.7)       |
| Intertap intervals (ms) nondominant hand           | Cognitive | Intertap intervals | Smartphone      | home     | PD       | 33 | 192.6 (105.9)          | 156.9 (109.3)           | -0.3      | (-0.6, 0.03)     |
| Percentage total correct from SDMT                 | Cognitive | DSST               | Smartphone      | clinic   | Controls | 43 | 21.5 (5.7)             | 25.7 (4.6)              | 0.7       | (-1.1, -0.5)     |
| Percentage total correct from SDMT                 | Cognitive | DSST               | Smartphone      | clinic   | PD       | 48 | 19.5 (6.2)             | 21.2 (6.3)              | 0.3       | (0.5, 1.0)       |
| Percentage total correct from SDMT                 | Cognitive | DSST               | Smartphone      | home     | Controls | 34 | 21.8 (6.5)             | 27.0 (4.0)              | 0.7       | (-1.2, -0.4)     |
| Percentage total correct from SDMT                 | Cognitive | DSST               | Smartphone      | home     | PD       | 36 | 21.5 (5.6)             | 22.9 (7.0)              | 0.3       | (0.4, 1.1)       |
| Percentage total correct from VSWM                 | Cognitive | VSWM               | Smartphone      | home     | Controls | 34 | 77.5 (13.2)            | 81.2 (13.0)             | 0.3       | (-0.6, -0.09)    |
| Percentage total correct from VSWM                 | Cognitive | VSWM               | Smartphone      | home     | PD       | 35 | 74.7 (9.8)             | 80.2 (11.3)             | 0.4       | (-0.07, 0.7)     |
| Percentage total correct from VSWM                 | Cognitive | VSWM               | Smartphone      | clinic   | Controls | 43 | 74.1 (12.4)            | 81.7 (11.4)             | 0.6       | (-0.9, -0.2)     |
| Percentage total correct from VSWM                 | Cognitive | VSWM               | Smartphone      | clinic   | PD       | 46 | 71.8 (10.0)            | 77.2 (10.2)             | 0.4       | (0.3, 1.0)       |
| Trail making task A time (ms)                      | Cognitive | Trails             | Smartphone      | clinic   | Controls | 40 | 23362.5 (10285.5)      | 18376.5 (6343.4)        | -0.5      | (0.4, 1.1)       |
| Trail making task A time (ms)                      | Cognitive | Trails             | Smartphone      | clinic   | PD       | 45 | 27672.4 (10021.3)      | 22592.3 (8320.6)        | -0.5      | (-0.8, -0.2)     |
| Trail making task A time (ms)                      | Cognitive | Trails             | Smartphone      | home     | Controls | 32 | 21954.3 (8452.3)       | 17111.4 (5323.2)        | -0.5      | (0.4, 1.0)       |
| Trail making task A time (ms)                      | Cognitive | Trails             | Smartphone      | home     | PD       | 31 | 23426.8 (6735.1)       | 23110.8 (9428.3)        | -0.04     | (-0.9, -0.2)     |
| Trail making task B time (ms)                      | Cognitive | Trails             | Smartphone      | clinic   | Controls | 39 | 24649.6 (7996.4)       | 18731.9 (4839.2)        | -0.7      | (0.3, 0.9)       |
| Trail making task B time (ms)                      | Cognitive | Trails             | Smartphone      | clinic   | PD       | 38 | 28894.2 (10020.4)      | 25006.5 (10811.4)       | -0.3      | (-1.1, -0.4)     |
| Trail making task B time (ms)                      | Cognitive | Trails             | Smartphone      | home     | Controls | 34 | 22237.9 (7366.7)       | 18077.5 (4205.9)        | -0.6      | (0.3, 0.8)       |
| Trail making task B time (ms)                      | Cognitive | Trails             | Smartphone      | home     | PD       | 33 | 25400.5 (8707.2)       | 21997.9 (7854.5)        | -0.5      | (-0.9, -0.3)     |
| Trail making task B minus trail making task A (ms) | Cognitive | Trails             | Smartphone      | clinic   | Controls | 32 | 77.1 (8758.5)          | 727.0 (4544.5)          | 0.07      | (-0.3, 0.09)     |
| Trail making task B minus trail making task A (ms) | Cognitive | Trails             | Smartphone      | clinic   | PD       | 31 | 951.5 (8268.4)         | -1255.0 (5812.5)        | -0.2      | (-0.3, 0.4)      |
| Trail making task B minus trail making task A (ms) | Cognitive | Trails             | Smartphone      | home     | Controls | 32 | 77.1 (8758.5)          | 727.0 (4544.5)          | 0.07      | (-0.3, 0.09)     |
| Trail making task B minus trail making task A (ms) | Cognitive | Trails             | Smartphone      | home     | PD       | 31 | 951.5 (8268.4)         | -1255.0 (5812.5)        | -0.2      | (-0.3, 0.4)      |
| Rater evaluation of gait                           | Gait      | item 3.10          | Clinical rating | clinic   | Controls | 45 | 0.04 (0.2)             | 0.07 (0.3)              | 0.1       | (-1.0, 0.2)      |
| Rater evaluation of gait                           | Gait      | item 3.10          | Clinical rating | clinic   | PD       | 47 | 0.7 (0.5)              | 0.7 (0.5)               | 0.05      | (0.1, 0.3)       |
| Self-reported walking and balance                  | Gait      | item 2.12          | Clinical rating | clinic   | Controls | 46 | 0 (0)                  | 0.04 (0.3)              | 0.1       | (-0.3, 0.2)      |
| Self-reported walking and balance                  | Gait      | item 2.12          | Clinical rating | clinic   | PD       | 47 | 0.3 (0.5)              | 0.5 (0.6)               | 0.3       | (0.1, 0.3)       |
| Arm swing (degrees) [mean] average of both arms    | Gait      | 2 minute walk      | Research accel. | clinic   | Controls | 43 | 56.9 (15.4)            | 53.3 (16.8)             | -0.4      | (-0.3, 0.6)      |
| Arm swing (degrees) [mean] average of both arms    | Gait      | Dual task          | Research accel. | clinic   | Controls | 44 | 55.1 (17.5)            | 55.0 (18.5)             | -0.01     | (-0.6, 0.4)      |
| Arm swing (degrees) [mean] average of both arms    | Gait      | 2 minute walk      | Research accel. | clinic   | PD       | 46 | 36.8 (18.1)            | 31.3 (18.3)             | -0.7      | (-0.7, -0.06)    |
| Arm swing (degrees) [mean] average of both arms    | Gait      | Dual task          | Research accel. | clinic   | PD       | 45 | 34.9 (17.9)            | 30.1 (17.7)             | -0.8      | (-0.4, 0.3)      |

|                                                              |      |               |                 |        |          |    |               |               |        |                |
|--------------------------------------------------------------|------|---------------|-----------------|--------|----------|----|---------------|---------------|--------|----------------|
| Arm swing (degrees) [mean] less affected side                | Gait | Dual task     | Research accel. | clinic | Controls | 44 | 56.3 (18.9)   | 56.7 (20.6)   | 0.03   | (-0.6, 0.5)    |
| Arm swing (degrees) [mean] less affected side                | Gait | 2 minute walk | Research accel. | clinic | PD       | 46 | 26.9 (18.4)   | 21.5 (16.0)   | -0.5   | (-0.7, -0.006) |
| Arm swing (degrees) [mean] less affected side                | Gait | Dual task     | Research accel. | clinic | PD       | 45 | 23.4 (16.2)   | 18.6 (13.7)   | -0.5   | (-0.4, 0.3)    |
| Arm swing (degrees) [mean] more affected side                | Gait | Dual task     | Research accel. | clinic | Controls | 44 | 54.0 (21.7)   | 53.3 (20.6)   | -0.07  | (-0.5, 0.3)    |
| Arm swing (degrees) [mean] more affected side                | Gait | 2 minute walk | Research accel. | clinic | PD       | 46 | 46.6 (23.9)   | 41.1 (25.0)   | -0.5   | (-0.7, -0.03)  |
| Arm swing (degrees) [mean] more affected side                | Gait | Dual task     | Research accel. | clinic | PD       | 45 | 46.4 (26.3)   | 41.5 (26.6)   | -0.5   | (-0.4, 0.2)    |
| Arm swing velocity (degrees) (s) [mean] average of both arms | Gait | 2 minute walk | Research accel. | clinic | Controls | 43 | 241.2 (64.6)  | 226.6 (72.3)  | -0.3   | (-0.2, 0.5)    |
| Arm swing velocity (degrees) (s) [mean] average of both arms | Gait | Dual task     | Research accel. | clinic | Controls | 44 | 241.4 (72.4)  | 234.5 (73.0)  | -0.1   | (-0.4, 0.5)    |
| Arm swing velocity (degrees) (s) [mean] average of both arms | Gait | 2 minute walk | Research accel. | clinic | PD       | 46 | 183.7 (88.5)  | 173.5 (92.5)  | -0.3   | (-0.7, -0.07)  |
| Arm swing velocity (degrees) (s) [mean] average of both arms | Gait | Dual task     | Research accel. | clinic | PD       | 45 | 185.6 (93.2)  | 175.3 (102.9) | -0.3   | (-0.5, 0.1)    |
| Arm swing velocity (degrees) (s) [mean] less affected side   | Gait | 2 minute walk | Research accel. | clinic | PD       | 46 | 169.3 (98.0)  | 160.8 (97.3)  | -0.2   | (-0.6, 0)      |
| Arm swing velocity (degrees) (s) [mean] more affected side   | Gait | 2 minute walk | Research accel. | clinic | PD       | 46 | 198.2 (103.2) | 186.1 (106.7) | -0.3   | (-0.7, -0.07)  |
| Arm swing velocity (degrees) (s) [mean] more affected side   | Gait | Dual task     | Research accel. | clinic | PD       | 45 | 203.8 (113.5) | 185.7 (118.3) | -0.4   | (-0.5, 0.08)   |
| Arm swing velocity (degrees) (s) [mean] less affected side   | Gait | Dual task     | Research accel. | clinic | PD       | 45 | 167.4 (103.4) | 164.9 (115.1) | -0.04  | (-0.5, 0.2)    |
| Cadence (steps/min) [mean] average of both legs              | Gait | 2 minute walk | Research accel. | clinic | Controls | 43 | 114.6 (8.6)   | 114.1 (8.6)   | -0.1   | (-0.3, 0.5)    |
| Cadence (steps/min) [mean] average of both legs              | Gait | Dual task     | Research accel. | clinic | Controls | 44 | 109.5 (10.0)  | 110.1 (9.0)   | 0.1    | (-0.5, 0.3)    |
| Cadence (steps/min) [mean] average of both legs              | Gait | 2 minute walk | Research accel. | clinic | PD       | 46 | 109.9 (7.4)   | 108.4 (9.0)   | -0.3   | (-0.4, 0.2)    |
| Cadence (steps/min) [mean] average of both legs              | Gait | Dual task     | Research accel. | clinic | PD       | 45 | 105.5 (9.0)   | 105.3 (9.7)   | -0.04  | (-0.2, 0.4)    |
| Circumduction cm [mean] average of both legs                 | Gait | 2 minute walk | Research accel. | clinic | Controls | 43 | 3.2 (1.4)     | 3.4 (1.2)     | 0.2    | (-0.4, 0.3)    |
| Circumduction cm [mean] average of both legs                 | Gait | Dual task     | Research accel. | clinic | Controls | 44 | 3.3 (1.4)     | 3.4 (1.4)     | 0.08   | (-0.3, 0.3)    |
| Circumduction cm [mean] average of both legs                 | Gait | 2 minute walk | Research accel. | clinic | PD       | 46 | 3.6 (1.2)     | 3.5 (1.3)     | -0.2   | (-0.1, 0.4)    |
| Circumduction cm [mean] average of both legs                 | Gait | Dual task     | Research accel. | clinic | PD       | 45 | 3.6 (1.2)     | 3.5 (1.4)     | -0.2   | (-0.3, 0.3)    |
| Double support (%GCT) [mean] average of both legs            | Gait | 2 minute walk | Research accel. | clinic | Controls | 43 | 21.2 (3.4)    | 21.2 (3.9)    | 0.02   | (-0.3, 0.5)    |
| Double support (%GCT) [mean] average of both legs            | Gait | Dual task     | Research accel. | clinic | Controls | 44 | 22.4 (3.7)    | 22.4 (4.1)    | 0.008  | (-0.3, 0.6)    |
| Double support (%GCT) [mean] average of both legs            | Gait | 2 minute walk | Research accel. | clinic | PD       | 46 | 21.1 (2.8)    | 21.5 (2.9)    | 0.2    | (-0.3, 0.3)    |
| Double support (%GCT) [mean] average of both legs            | Gait | Dual task     | Research accel. | clinic | PD       | 45 | 22.7 (4.2)    | 22.5 (3.4)    | -0.05  | (-0.3, 0.3)    |
| Elevation at midswing cm [mean] average of both legs         | Gait | 2 minute walk | Research accel. | clinic | Controls | 42 | 1.5 (0.6)     | 1.4 (0.7)     | -0.1   | (-0.4, 0.4)    |
| Elevation at midswing cm [mean] average of both legs         | Gait | 2 minute walk | Research accel. | clinic | PD       | 46 | 1.6 (0.6)     | 1.7 (0.6)     | 0.1    | (-0.5, 0.2)    |
| Elevation at midswing cm [mean] average of both legs         | Gait | Dual task     | Research accel. | clinic | Controls | 43 | 1.3 (0.6)     | 1.2 (0.7)     | -0.1   | (-0.4, 0.5)    |
| Elevation at midswing cm [mean] average of both legs         | Gait | Dual task     | Research accel. | clinic | PD       | 45 | 1.5 (0.6)     | 1.6 (0.6)     | 0.2    | (-0.4, 0.2)    |
| Foot strike angle (degrees) [mean] average of both legs      | Gait | 2 minute walk | Research accel. | clinic | Controls | 43 | 25.7 (5.2)    | 25.2 (4.2)    | -0.2   | (-0.2, 0.5)    |
| Foot strike angle (degrees) [mean] average of both legs      | Gait | 2 minute walk | Research accel. | clinic | PD       | 46 | 23.0 (4.3)    | 21.4 (5.1)    | -0.6   | (-0.5, 0.1)    |
| Foot.strike.angle (degrees) [mean] average of both legs      | Gait | Dual task     | Research accel. | clinic | Controls | 43 | 24.6 (5.5)    | 24.0 (4.6)    | -0.2   | (-0.08, 0.6)   |
| Foot.strike.angle (degrees) [mean] average of both legs      | Gait | Dual task     | Research accel. | clinic | PD       | 44 | 21.5 (5.4)    | 19.9 (5.9)    | -0.5   | (-0.6, 0.1)    |
| Gait cycle duration (s) [mean] average of both legs          | Gait | 2 minute walk | Research accel. | clinic | Controls | 43 | 1.1 (0.08)    | 1.1 (0.08)    | 0.09   | (-0.5, 0.5)    |
| Gait cycle duration (s) [mean] average of both legs          | Gait | 2 minute walk | Research accel. | clinic | PD       | 46 | 1.1 (0.07)    | 1.1 (0.09)    | 0.3    | (-0.2, 0.4)    |
| Gait cycle duration (s) [mean] average of both legs          | Gait | Dual task     | Research accel. | clinic | Controls | 44 | 1.1 (0.1)     | 1.1 (0.1)     | -0.1   | (-0.3, 0.5)    |
| Gait cycle duration (s) [mean] average of both legs          | Gait | Dual task     | Research accel. | clinic | PD       | 45 | 1.1 (0.1)     | 1.1 (0.1)     | 0.04   | (-0.4, 0.2)    |
| Lumbar coronal range of motion (degrees) [mean]              | Gait | 2 minute walk | Research accel. | clinic | Controls | 43 | 6.6 (1.9)     | 6.4 (2.5)     | -0.08  | (-0.2, 0.4)    |
| Lumbar coronal range of motion (degrees) [mean]              | Gait | Dual task     | Research accel. | clinic | Controls | 44 | 6.2 (1.9)     | 6.1 (2.3)     | -0.04  | (-0.2, 0.4)    |
| Lumbar coronal range of motion (degrees) [mean]              | Gait | 2 minute walk | Research accel. | clinic | PD       | 46 | 6.2 (2.0)     | 6.4 (2.3)     | 0.1    | (-0.4, 0.2)    |
| Lumbar coronal range of motion (degrees) [mean]              | Gait | Dual task     | Research accel. | clinic | PD       | 45 | 6.0 (2.0)     | 6.2 (2.3)     | 0.2    | (-0.3, 0.3)    |
| Lumbar sagittal range of motion (degrees) [mean]             | Gait | 2 minute walk | Research accel. | clinic | Controls | 43 | 6.4 (2.7)     | 6.1 (2.9)     | -0.1   | (-0.5, 0.1)    |
| Lumbar sagittal range of motion (degrees) [mean]             | Gait | Dual task     | Research accel. | clinic | Controls | 44 | 6.3 (3.3)     | 5.8 (2.6)     | -0.2   | (-0.4, 0.2)    |
| Lumbar sagittal range of motion (degrees) [mean]             | Gait | 2 minute walk | Research accel. | clinic | PD       | 46 | 5.6 (2.3)     | 5.5 (2.0)     | -0.02  | (-0.5, 0.2)    |
| Lumbar sagittal range of motion (degrees) [mean]             | Gait | Dual task     | Research accel. | clinic | PD       | 45 | 5.4 (2.2)     | 5.3 (2.0)     | -0.06  | (-0.5, 0.1)    |
| Lumbar transverse range of motion (degrees) [mean]           | Gait | 2 minute walk | Research accel. | clinic | Controls | 43 | 8.4 (2.7)     | 8.4 (3.0)     | -0.002 | (-0.4, 0.3)    |
| Lumbar transverse range of motion (degrees) [mean]           | Gait | Dual task     | Research accel. | clinic | Controls | 44 | 8.7 (2.9)     | 8.8 (3.0)     | 0.08   | (-0.4, 0.3)    |
| Lumbar transverse range of motion (degrees) [mean]           | Gait | 2 minute walk | Research accel. | clinic | PD       | 46 | 8.1 (3.0)     | 8.4 (3.1)     | 0.1    | (-0.3, 0.3)    |
| Lumbar transverse range of motion (degrees) [mean]           | Gait | Dual task     | Research accel. | clinic | PD       | 45 | 7.9 (2.6)     | 8.3 (3.2)     | 0.2    | (-0.2, 0.4)    |
| Singlelimb support (%GCT) [mean] average of both legs        | Gait | 2 minute walk | Research accel. | clinic | Controls | 43 | 39.4 (1.8)    | 39.4 (2.0)    | -0.01  | (-0.5, 0.2)    |
| Singlelimb support (%GCT) [mean] average of both legs        | Gait | Dual task     | Research accel. | clinic | Controls | 44 | 38.8 (1.8)    | 38.8 (2.0)    | -0.001 | (-0.6, 0.3)    |
| Singlelimb support (%GCT) [mean] average of both legs        | Gait | 2 minute walk | Research accel. | clinic | PD       | 46 | 39.5 (1.4)    | 39.2 (1.5)    | -0.2   | (-0.3, 0.3)    |
| Singlelimb support (%GCT) [mean] average of both legs        | Gait | Dual task     | Research accel. | clinic | PD       | 45 | 38.7 (2.1)    | 38.7 (1.7)    | 0.04   | (-0.3, 0.3)    |
| Gait speed (m/s) [mean] average of both legs                 | Gait | 2 minute walk | Research accel. | clinic | Controls | 43 | 1.2 (0.2)     | 1.2 (0.2)     | -0.2   | (-0.3, 0.6)    |
| Gait speed (m/s) [mean] average of both legs                 | Gait | Dual task     | Research accel. | clinic | Controls | 44 | 1.1 (0.2)     | 1.1 (0.2)     | -0.02  | (-0.4, 0.5)    |
| Gait speed (m/s) [mean] average of both legs                 | Gait | 2 minute walk | Research accel. | clinic | PD       | 46 | 1.1 (0.1)     | 1.1 (0.2)     | -0.5   | (-0.5, 0.09)   |
| Gait speed (m/s) [mean] average of both legs                 | Gait | Dual task     | Research accel. | clinic | PD       | 45 | 1.0 (0.2)     | 1.0 (0.2)     | -0.2   | (-0.4, 0.3)    |
| Stance (%GCT) [mean] average of both legs                    | Gait | 2 minute walk | Research accel. | clinic | Controls | 43 | 60.6 (1.7)    | 60.6 (2.0)    | 0.02   | (-0.3, 0.5)    |
| Stance (%GCT) [mean] average of both legs                    | Gait | Dual task     | Research accel. | clinic | Controls | 44 | 61.2 (1.8)    | 61.2 (2.0)    | 0.01   | (-0.4, 0.6)    |
| Stance (%GCT) [mean] average of both legs                    | Gait | 2 minute walk | Research accel. | clinic | PD       | 46 | 60.5 (1.4)    | 60.7 (1.5)    | 0.2    | (-0.3, 0.3)    |
| Stance (%GCT) [mean] average of both legs                    | Gait | Dual task     | Research accel. | clinic | PD       | 45 | 61.4 (2.1)    | 61.3 (1.7)    | -0.06  | (-0.3, 0.3)    |
| Step duration (s) [mean] average of both legs                | Gait | 2 minute walk | Research accel. | clinic | Controls | 43 | 0.5 (0.04)    | 0.5 (0.04)    | 0.1    | (-0.5, 0.5)    |
| Step duration (s) [mean] average of both legs                | Gait | Dual task     | Research accel. | clinic | Controls | 44 | 0.6 (0.05)    | 0.5 (0.05)    | -0.1   | (-0.3, 0.5)    |
| Step duration (s) [mean] average of both legs                | Gait | 2 minute walk | Research accel. | clinic | PD       | 46 | 0.5 (0.04)    | 0.6 (0.04)    | 0.3    | (-0.2, 0.4)    |
| Step duration (s) [mean] average of both legs                | Gait | Dual task     | Research accel. | clinic | PD       | 45 | 0.6 (0.05)    | 0.6 (0.05)    | 0.04   | (-0.4, 0.2)    |
| Stride length (m) [mean] average of both legs                | Gait | 2 minute walk | Research accel. | clinic | Controls | 43 | 1.3 (0.2)     | 1.2 (0.1)     | -0.3   | (-0.3, 0.5)    |
| Stride length (m) [mean] average of both legs                | Gait | Dual task     | Research accel. | clinic | Controls | 44 | 1.2 (0.2)     | 1.2 (0.1)     | -0.08  | (-0.4, 0.5)    |
| Stride length (m) [mean] average of both legs                | Gait | 2 minute walk | Research accel. | clinic | PD       | 46 | 1.2 (0.1)     | 1.2 (0.2)     | -0.5   | (-0.6, 0.06)   |
| Stride length (m) [mean] average of both legs                | Gait | Dual task     | Research accel. | clinic | PD       | 45 | 1.2 (0.2)     | 1.1 (0.2)     | -0.3   | (-0.4, 0.2)    |
| Swing (%GCT) [mean] average of both legs                     | Gait | 2 minute walk | Research accel. | clinic | Controls | 43 | 39.4 (1.7)    | 39.4 (2.0)    | -0.02  | (-0.5, 0.3)    |
| Swing (%GCT) [mean] average of both legs                     | Gait | Dual task     | Research accel. | clinic | Controls | 44 | 38.8 (1.8)    | 38.8 (2.0)    | -0.01  | (-0.6, 0.4)    |

|                                                            |      |               |                 |        |          |    |              |              |        |               |
|------------------------------------------------------------|------|---------------|-----------------|--------|----------|----|--------------|--------------|--------|---------------|
| Swing (%GCT) [mean] average of both legs                   | Gait | 2 minute walk | Research accel. | clinic | PD       | 46 | 39.5 (1.4)   | 39.3 (1.5)   | -0.2   | (-0.3, 0.3)   |
| Swing (%GCT) [mean] average of both legs                   | Gait | Dual task     | Research accel. | clinic | PD       | 45 | 38.6 (2.1)   | 38.7 (1.7)   | 0.06   | (-0.3, 0.3)   |
| Terminal double support (%GCT) [mean] average of both legs | Gait | 2 minute walk | Research accel. | clinic | Controls | 43 | 10.6 (1.7)   | 10.6 (2.0)   | 0.02   | (-0.3, 0.5)   |
| Terminal double support (%GCT) [mean] average of both legs | Gait | Dual task     | Research accel. | clinic | Controls | 44 | 11.2 (1.8)   | 11.2 (2.0)   | -0.002 | (-0.3, 0.6)   |
| Terminal double support (%GCT) [mean] average of both legs | Gait | 2 minute walk | Research accel. | clinic | PD       | 46 | 10.6 (1.4)   | 10.8 (1.5)   | 0.2    | (-0.3, 0.3)   |
| Terminal double support (%GCT) [mean] average of both legs | Gait | Dual task     | Research accel. | clinic | PD       | 44 | 11.1 (1.7)   | 11.3 (1.7)   | 0.1    | (-0.3, 0.3)   |
| Toe off angle (degrees) [mean] average of both legs        | Gait | 2 minute walk | Research accel. | clinic | Controls | 43 | 36.9 (3.4)   | 37.1 (3.4)   | 0.09   | (-0.5, 0.1)   |
| Toe off angle (degrees) [mean] average of both legs        | Gait | Dual task     | Research accel. | clinic | Controls | 44 | 35.8 (3.5)   | 36.0 (3.8)   | 0.06   | (-0.5, 0.2)   |
| Toe off angle (degrees) [mean] average of both legs        | Gait | 2 minute walk | Research accel. | clinic | PD       | 46 | 36.8 (3.8)   | 36.0 (4.0)   | -0.3   | (-0.2, 0.4)   |
| Toe off angle (degrees) [mean] average of both legs        | Gait | Dual task     | Research accel. | clinic | PD       | 45 | 35.7 (4.2)   | 35.1 (4.1)   | -0.2   | (-0.3, 0.4)   |
| Toe out angle (degrees) [mean] average of both legs        | Gait | 2 minute walk | Research accel. | clinic | Controls | 43 | 6.6 (6.6)    | 9.0 (6.5)    | 0.4    | (-0.6, 0.007) |
| Toe out angle (degrees) [mean] average of both legs        | Gait | Dual task     | Research accel. | clinic | Controls | 44 | 6.5 (6.7)    | 9.1 (6.3)    | 0.5    | (-0.6, 0.001) |
| Toe out angle (degrees) [mean] average of both legs        | Gait | 2 minute walk | Research accel. | clinic | PD       | 46 | 6.6 (7.0)    | 7.0 (7.6)    | 0.06   | (0.2, 0.8)    |
| Toe out angle (degrees) [mean] average of both legs        | Gait | Dual task     | Research accel. | clinic | PD       | 45 | 6.5 (7.2)    | 7.3 (7.8)    | 0.1    | (0.2, 0.8)    |
| Trunk coronal range of motion (degrees) [mean]             | Gait | 2 minute walk | Research accel. | clinic | Controls | 42 | 6.2 (2.4)    | 6.0 (2.1)    | -0.09  | (-0.4, 0.3)   |
| Trunk coronal range of motion (degrees) [mean]             | Gait | Dual task     | Research accel. | clinic | Controls | 43 | 6.7 (2.5)    | 6.5 (2.2)    | -0.2   | (-0.3, 0.4)   |
| Trunk coronal range of motion (degrees) [mean]             | Gait | 2 minute walk | Research accel. | clinic | PD       | 46 | 5.1 (2.3)    | 4.8 (2.5)    | -0.2   | (-0.4, 0.2)   |
| Trunk coronal range of motion (degrees) [mean]             | Gait | Dual task     | Research accel. | clinic | PD       | 45 | 5.1 (2.3)    | 4.9 (2.6)    | -0.2   | (-0.6, 0.1)   |
| Trunk sagittal range of motion (degrees) [mean]            | Gait | 2 minute walk | Research accel. | clinic | Controls | 42 | 4.8 (1.5)    | 4.9 (1.2)    | 0.1    | (-0.3, 0.4)   |
| Trunk sagittal range of motion (degrees) [mean]            | Gait | Dual task     | Research accel. | clinic | Controls | 43 | 4.9 (1.5)    | 5.0 (1.2)    | 0.03   | (-0.3, 0.4)   |
| Trunk sagittal range of motion (degrees) [mean]            | Gait | 2 minute walk | Research accel. | clinic | PD       | 46 | 4.4 (1.0)    | 4.3 (1.0)    | -0.09  | (-0.2, 0.5)   |
| Trunk sagittal range of motion (degrees) [mean]            | Gait | Dual task     | Research accel. | clinic | PD       | 45 | 4.4 (0.9)    | 4.3 (1.1)    | -0.1   | (-0.2, 0.4)   |
| Trunk transverse range of motion (degrees) [mean]          | Gait | 2 minute walk | Research accel. | clinic | Controls | 42 | 8.6 (2.5)    | 9.6 (4.8)    | 0.2    | (-0.5, 0.1)   |
| Trunk transverse range of motion (degrees) [mean]          | Gait | Dual task     | Research accel. | clinic | Controls | 43 | 9.5 (3.3)    | 9.7 (3.7)    | 0.07   | (-0.3, 0.2)   |
| Trunk transverse range of motion (degrees) [mean]          | Gait | 2 minute walk | Research accel. | clinic | PD       | 46 | 7.8 (2.4)    | 7.6 (2.3)    | -0.2   | (0.03, 0.4)   |
| Trunk transverse range of motion (degrees) [mean]          | Gait | Dual task     | Research accel. | clinic | PD       | 45 | 7.9 (2.4)    | 7.7 (2.6)    | -0.2   | (-0.3, 0.3)   |
| Cadence (steps/min) [mean]                                 | Gait | 1 minute walk | Smartphone      | clinic | Controls | 34 | 113.4 (9.4)  | 113.5 (8.6)  | 0.02   | (-0.3, 0.3)   |
| Cadence (steps/min) [mean]                                 | Gait | 1 minute walk | Smartphone      | clinic | PD       | 27 | 108.2 (10.5) | 109.2 (10.2) | 0.2    | (-0.3, 0.4)   |
| Cadence (steps/min) [mean]                                 | Gait | 1 minute walk | Smartphone      | home   | Controls | 19 | 110.2 (14.2) | 108.7 (12.9) | -0.2   | (-0.2, 0.5)   |
| Cadence (steps/min) [mean]                                 | Gait | 1 minute walk | Smartphone      | home   | PD       | 19 | 106.8 (11.4) | 106.3 (11.8) | -0.1   | (-1.0, 0.3)   |
| Double support (s) [mean]                                  | Gait | 1 minute walk | Smartphone      | clinic | Controls | 34 | 0.3 (0.02)   | 0.3 (0.02)   | -0.09  | (-0.1, 0.6)   |
| Double support (s) [mean]                                  | Gait | 1 minute walk | Smartphone      | clinic | PD       | 27 | 0.3 (0.03)   | 0.3 (0.03)   | -0.2   | (-0.5, 0.2)   |
| Double support (s) [mean]                                  | Gait | 1 minute walk | Smartphone      | home   | Controls | 18 | 0.3 (0.03)   | 0.3 (0.02)   | 0.07   | (-0.7, 0.2)   |
| Double support (s) [mean]                                  | Gait | 1 minute walk | Smartphone      | home   | PD       | 19 | 0.3 (0.03)   | 0.3 (0.03)   | -0.03  | (-0.3, 0.8)   |
| Double support (s) asymmetry                               | Gait | 1 minute walk | Smartphone      | clinic | Controls | 29 | 1.0 (0.6)    | 0.9 (0.6)    | -0.09  | (-0.1, 0.5)   |
| Double support (s) asymmetry                               | Gait | 1 minute walk | Smartphone      | clinic | PD       | 25 | 0.8 (0.5)    | 1.0 (0.7)    | 0.3    | (-0.4, 0.3)   |
| Double support (s) asymmetry                               | Gait | 1 minute walk | Smartphone      | home   | Controls | 16 | 1.2 (0.9)    | 1.0 (0.6)    | -0.2   | (0.007, 0.5)  |
| Double support (s) asymmetry                               | Gait | 1 minute walk | Smartphone      | home   | PD       | 17 | 1.5 (0.9)    | 1.5 (1.3)    | -0.02  | (-0.8, 0.3)   |
| Double support (%GCT) [mean]                               | Gait | 1 minute walk | Smartphone      | clinic | Controls | 34 | 0.3 (0.004)  | 0.3 (0.004)  | -0.08  | (-0.1, 0.6)   |
| Double support (%GCT) [mean]                               | Gait | 1 minute walk | Smartphone      | clinic | PD       | 27 | 0.3 (0.005)  | 0.3 (0.004)  | -0.2   | (-0.5, 0.3)   |
| Double support (%GCT) [mean]                               | Gait | 1 minute walk | Smartphone      | home   | Controls | 19 | 0.3 (0.004)  | 0.3 (0.004)  | -0.3   | (-0.1, 0.4)   |
| Double support (%GCT) [mean]                               | Gait | 1 minute walk | Smartphone      | home   | PD       | 17 | 0.3 (0.004)  | 0.3 (0.005)  | -0.1   | (-0.7, 0.2)   |
| Double support (%GCT) asymmetry                            | Gait | 1 minute walk | Smartphone      | clinic | Controls | 30 | 0.9 (0.5)    | 0.9 (0.4)    | -0.1   | (-0.2, 0.5)   |
| Double support (%GCT) asymmetry                            | Gait | 1 minute walk | Smartphone      | clinic | PD       | 26 | 0.9 (0.8)    | 1.0 (0.5)    | 0.07   | (-0.5, 0.3)   |
| Double support (%GCT) asymmetry                            | Gait | 1 minute walk | Smartphone      | home   | Controls | 17 | 1.2 (0.8)    | 1.1 (0.5)    | -0.1   | (-0.1, 0.5)   |
| Double support (%GCT) asymmetry                            | Gait | 1 minute walk | Smartphone      | home   | PD       | 19 | 1.2 (0.9)    | 1.6 (1.4)    | 0.2    | (-0.6, 0.4)   |
| Gait speed (m/s) [mean]                                    | Gait | 1 minute walk | Smartphone      | clinic | Controls | 33 | 1.1 (0.2)    | 1.1 (0.2)    | 0.1    | (-0.4, 0.2)   |
| Gait speed (m/s) [mean]                                    | Gait | 1 minute walk | Smartphone      | clinic | PD       | 27 | 1.0 (0.2)    | 1.0 (0.2)    | -0.2   | (-0.2, 0.6)   |
| Gait speed (m/s) [mean]                                    | Gait | 1 minute walk | Smartphone      | home   | Controls | 18 | 0.9 (0.2)    | 0.9 (0.2)    | 0.1    | (-0.2, 0.5)   |
| Gait speed (m/s) [mean]                                    | Gait | 1 minute walk | Smartphone      | home   | PD       | 19 | 0.9 (0.2)    | 0.9 (0.2)    | 0.4    | (-0.6, 0.5)   |
| Initial double support (s) [mean]                          | Gait | 1 minute walk | Smartphone      | clinic | Controls | 34 | 0.1 (0.01)   | 0.1 (0.01)   | -0.04  | (-0.1, 0.5)   |
| Initial double support (s) [mean]                          | Gait | 1 minute walk | Smartphone      | clinic | PD       | 27 | 0.1 (0.01)   | 0.1 (0.01)   | -0.2   | (-0.4, 0.3)   |
| Initial double support (s) [mean]                          | Gait | 1 minute walk | Smartphone      | home   | Controls | 18 | 0.1 (0.02)   | 0.1 (0.01)   | -0.03  | (-0.6, 0.3)   |
| Initial double support (s) [mean]                          | Gait | 1 minute walk | Smartphone      | home   | PD       | 19 | 0.1 (0.01)   | 0.1 (0.02)   | -0.002 | (-0.4, 0.7)   |
| Initial double support (s) asymmetry                       | Gait | 1 minute walk | Smartphone      | clinic | Controls | 33 | 5.6 (4.3)    | 5.1 (3.7)    | -0.1   | (-0.3, 0.4)   |
| Initial double support (s) asymmetry                       | Gait | 1 minute walk | Smartphone      | clinic | PD       | 25 | 5.6 (5.2)    | 6.1 (4.9)    | 0.1    | (-0.4, 0.3)   |
| Initial double support (s) asymmetry                       | Gait | 1 minute walk | Smartphone      | home   | Controls | 19 | 7.6 (6.2)    | 6.7 (5.3)    | -0.1   | (-0.3, 0.3)   |
| Initial double support (s) asymmetry                       | Gait | 1 minute walk | Smartphone      | home   | PD       | 14 | 7.4 (5.0)    | 7.4 (5.4)    | -0.01  | (-0.6, 0.4)   |
| Single limb support (s) [mean]                             | Gait | 1 minute walk | Smartphone      | clinic | Controls | 34 | 0.4 (0.04)   | 0.4 (0.03)   | 0.004  | (-0.3, 0.5)   |
| Single limb support (s) [mean]                             | Gait | 1 minute walk | Smartphone      | clinic | PD       | 27 | 0.4 (0.04)   | 0.4 (0.04)   | -0.1   | (-0.4, 0.3)   |
| Single limb support (s) [mean]                             | Gait | 1 minute walk | Smartphone      | home   | Controls | 18 | 0.4 (0.04)   | 0.4 (0.04)   | 0.09   | (-0.6, 0.2)   |
| Single limb support (s) [mean]                             | Gait | 1 minute walk | Smartphone      | home   | PD       | 19 | 0.4 (0.04)   | 0.4 (0.05)   | 0.1    | (-0.3, 1.0)   |
| Single limb support (s) asymmetry                          | Gait | 1 minute walk | Smartphone      | clinic | Controls | 32 | 3.4 (2.3)    | 5.3 (3.8)    | 0.5    | (-0.8, 0.05)  |
| Single limb support (s) asymmetry                          | Gait | 1 minute walk | Smartphone      | clinic | PD       | 25 | 4.5 (2.5)    | 5.2 (3.5)    | 0.2    | (0.2, 0.9)    |
| Single limb support (s) asymmetry                          | Gait | 1 minute walk | Smartphone      | home   | Controls | 18 | 4.9 (2.8)    | 6.3 (5.4)    | 0.3    | (-0.4, 0.3)   |
| Single limb support (s) asymmetry                          | Gait | 1 minute walk | Smartphone      | home   | PD       | 18 | 5.1 (2.6)    | 5.1 (3.6)    | -0.003 | (-0.2, 0.7)   |
| Stance (s) [mean]                                          | Gait | 1 minute walk | Smartphone      | clinic | Controls | 34 | 0.7 (0.06)   | 0.7 (0.05)   | -0.1   | (-0.2, 0.6)   |
| Stance (s) [mean]                                          | Gait | 1 minute walk | Smartphone      | clinic | PD       | 27 | 0.7 (0.07)   | 0.7 (0.06)   | -0.1   | (-0.5, 0.2)   |
| Stance (s) [mean]                                          | Gait | 1 minute walk | Smartphone      | home   | Controls | 18 | 0.7 (0.07)   | 0.7 (0.06)   | 0.06   | (-0.6, 0.2)   |
| Stance (s) [mean]                                          | Gait | 1 minute walk | Smartphone      | home   | PD       | 19 | 0.7 (0.07)   | 0.7 (0.08)   | 0.07   | (-0.3, 0.8)   |
| Stance (s) asymmetry                                       | Gait | 1 minute walk | Smartphone      | clinic | Controls | 33 | 2.3 (1.6)    | 3.3 (2.3)    | 0.4    | (-0.6, 0.1)   |
| Stance (s) asymmetry                                       | Gait | 1 minute walk | Smartphone      | clinic | PD       | 25 | 2.8 (1.5)    | 3.2 (2.1)    | 0.2    | (0.1, 0.8)    |

|                                       |             |               |                 |        |          |    |             |             |       |              |
|---------------------------------------|-------------|---------------|-----------------|--------|----------|----|-------------|-------------|-------|--------------|
| Stance (s) asymmetry                  | Gait        | 1 minute walk | Smartphone      | home   | Controls | 18 | 3.4 (2.4)   | 3.7 (3.3)   | 0.1   | (-0.3, 0.4)  |
| Stance (s) asymmetry                  | Gait        | 1 minute walk | Smartphone      | home   | PD       | 18 | 3.5 (2.3)   | 3.5 (2.4)   | 0.02  | (-0.4, 0.6)  |
| Stance (%GCT) [mean]                  | Gait        | 1 minute walk | Smartphone      | clinic | Controls | 34 | 0.6 (0.003) | 0.6 (0.002) | -0.2  | (0.07, 0.7)  |
| Stance (%GCT) [mean]                  | Gait        | 1 minute walk | Smartphone      | clinic | PD       | 27 | 0.6 (0.002) | 0.6 (0.003) | -0.1  | (-0.8, 0.08) |
| Stance (%GCT) [mean]                  | Gait        | 1 minute walk | Smartphone      | home   | Controls | 17 | 0.6 (0.002) | 0.6 (0.003) | -0.4  | (-0.3, 0.2)  |
| Stance (%GCT) [mean]                  | Gait        | 1 minute walk | Smartphone      | home   | PD       | 14 | 0.6 (0.002) | 0.6 (0.004) | -0.8  | (-1.0, 0.09) |
| Stance (%GCT) asymmetry               | Gait        | 1 minute walk | Smartphone      | clinic | Controls | 34 | 2.2 (2.2)   | 3.2 (2.3)   | 0.3   | (-0.7, 0.08) |
| Stance (%GCT) asymmetry               | Gait        | 1 minute walk | Smartphone      | clinic | PD       | 25 | 2.5 (1.4)   | 3.0 (2.1)   | 0.3   | (0.005, 0.8) |
| Stance (%GCT) asymmetry               | Gait        | 1 minute walk | Smartphone      | home   | Controls | 18 | 2.7 (1.6)   | 3.7 (3.3)   | 0.3   | (-0.4, 0.3)  |
| Stance (%GCT) asymmetry               | Gait        | 1 minute walk | Smartphone      | home   | PD       | 16 | 2.8 (1.4)   | 3.0 (2.2)   | 0.1   | (-0.1, 0.8)  |
| Step duration (s) [mean]              | Gait        | 1 minute walk | Smartphone      | clinic | Controls | 34 | 0.5 (0.04)  | 0.5 (0.04)  | -0.08 | (-0.2, 0.5)  |
| Step duration (s) [mean]              | Gait        | 1 minute walk | Smartphone      | clinic | PD       | 27 | 0.6 (0.06)  | 0.6 (0.05)  | -0.1  | (-0.5, 0.2)  |
| Step duration (s) [mean]              | Gait        | 1 minute walk | Smartphone      | home   | Controls | 18 | 0.5 (0.06)  | 0.5 (0.05)  | 0.04  | (-0.6, 0.2)  |
| Step duration (s) [mean]              | Gait        | 1 minute walk | Smartphone      | home   | PD       | 19 | 0.6 (0.06)  | 0.6 (0.07)  | 0.1   | (-0.4, 0.8)  |
| Step duration (s) asymmetry           | Gait        | 1 minute walk | Smartphone      | clinic | Controls | 34 | 3.8 (2.8)   | 4.7 (3.1)   | 0.2   | (-0.6, 0.2)  |
| Step duration (s) asymmetry           | Gait        | 1 minute walk | Smartphone      | clinic | PD       | 25 | 4.1 (2.5)   | 4.8 (3.7)   | 0.2   | (-0.08, 0.6) |
| Step duration (s) asymmetry           | Gait        | 1 minute walk | Smartphone      | home   | Controls | 18 | 3.9 (2.3)   | 5.3 (4.9)   | 0.3   | (-0.2, 0.4)  |
| Step duration (s) asymmetry           | Gait        | 1 minute walk | Smartphone      | home   | PD       | 18 | 5.1 (3.3)   | 5.3 (3.8)   | 0.06  | (-0.3, 0.6)  |
| Step length (m) [mean]                | Gait        | 1 minute walk | Smartphone      | clinic | Controls | 34 | 0.6 (0.09)  | 0.6 (0.08)  | 0.2   | (-0.5, 0.08) |
| Step length (m) [mean]                | Gait        | 1 minute walk | Smartphone      | clinic | PD       | 27 | 0.6 (0.07)  | 0.6 (0.09)  | -0.3  | (-0.2, 0.6)  |
| Step length (m) [mean]                | Gait        | 1 minute walk | Smartphone      | home   | Controls | 18 | 0.5 (0.08)  | 0.5 (0.08)  | 0.4   | (-0.3, 0.4)  |
| Step length (m) [mean]                | Gait        | 1 minute walk | Smartphone      | home   | PD       | 19 | 0.5 (0.08)  | 0.5 (0.08)  | 0.6   | (0.05, 0.7)  |
| Step length (m) asymmetry             | Gait        | 1 minute walk | Smartphone      | clinic | Controls | 34 | 5.0 (3.1)   | 5.6 (4.3)   | 0.1   | (-0.3, 0.4)  |
| Step length (m) asymmetry             | Gait        | 1 minute walk | Smartphone      | clinic | PD       | 27 | 7.3 (5.6)   | 7.9 (5.8)   | 0.09  | (-0.2, 0.4)  |
| Step length (m) asymmetry             | Gait        | 1 minute walk | Smartphone      | home   | Controls | 17 | 6.9 (3.2)   | 6.3 (4.6)   | -0.09 | (-0.3, 0.4)  |
| Step length (m) asymmetry             | Gait        | 1 minute walk | Smartphone      | home   | PD       | 19 | 7.7 (4.7)   | 9.0 (6.2)   | 0.2   | (-0.8, 0.3)  |
| Stride duration (s) [mean]            | Gait        | 1 minute walk | Smartphone      | clinic | Controls | 34 | 1.1 (0.09)  | 1.1 (0.08)  | -0.08 | (-0.2, 0.4)  |
| Stride duration (s) [mean]            | Gait        | 1 minute walk | Smartphone      | clinic | PD       | 27 | 1.1 (0.1)   | 1.1 (0.1)   | -0.1  | (-0.5, 0.2)  |
| Stride duration (s) [mean]            | Gait        | 1 minute walk | Smartphone      | home   | Controls | 18 | 1.1 (0.1)   | 1.1 (0.09)  | 0.1   | (-0.5, 0.2)  |
| Stride duration (s) [mean]            | Gait        | 1 minute walk | Smartphone      | home   | PD       | 19 | 1.1 (0.1)   | 1.1 (0.1)   | 0.09  | (-0.3, 0.8)  |
| Stride duration (s) asymmetry         | Gait        | 1 minute walk | Smartphone      | clinic | Controls | 33 | 0.7 (0.4)   | 0.7 (0.5)   | -0.09 | (-0.2, 0.5)  |
| Stride duration (s) asymmetry         | Gait        | 1 minute walk | Smartphone      | clinic | PD       | 26 | 0.8 (0.5)   | 0.8 (0.5)   | 0.1   | (-0.4, 0.3)  |
| Stride duration (s) asymmetry         | Gait        | 1 minute walk | Smartphone      | home   | Controls | 16 | 0.7 (0.5)   | 0.9 (0.9)   | 0.2   | (-0.1, 0.5)  |
| Stride duration (s) asymmetry         | Gait        | 1 minute walk | Smartphone      | home   | PD       | 17 | 1.2 (0.9)   | 1.0 (0.8)   | -0.1  | (-0.4, 0.7)  |
| Stride length (m) [mean]              | Gait        | 1 minute walk | Smartphone      | clinic | Controls | 34 | 1.2 (0.2)   | 1.2 (0.2)   | 0.2   | (-0.5, 0.09) |
| Stride length (m) [mean]              | Gait        | 1 minute walk | Smartphone      | clinic | PD       | 27 | 1.1 (0.1)   | 1.1 (0.2)   | -0.4  | (-0.1, 0.6)  |
| Stride length (m) [mean]              | Gait        | 1 minute walk | Smartphone      | home   | Controls | 18 | 1.0 (0.2)   | 1.0 (0.2)   | 0.3   | (-0.3, 0.4)  |
| Stride length (m) [mean]              | Gait        | 1 minute walk | Smartphone      | home   | PD       | 19 | 1.0 (0.2)   | 1.0 (0.2)   | 0.5   | (-0.1, 0.6)  |
| Stride length (m) asymmetry           | Gait        | 1 minute walk | Smartphone      | clinic | Controls | 34 | 1.2 (0.9)   | 0.9 (0.5)   | -0.3  | (-0.03, 0.5) |
| Stride length (m) asymmetry           | Gait        | 1 minute walk | Smartphone      | clinic | PD       | 26 | 1.1 (0.6)   | 1.1 (0.6)   | 0.04  | (-0.6, 0.08) |
| Stride length (m) asymmetry           | Gait        | 1 minute walk | Smartphone      | home   | Controls | 17 | 1.5 (1.2)   | 1.2 (1.1)   | -0.2  | (-0.1, 0.5)  |
| Stride length (m) asymmetry           | Gait        | 1 minute walk | Smartphone      | home   | PD       | 15 | 1.5 (0.9)   | 1.5 (1.4)   | -0.01 | (-0.7, 0.3)  |
| Swing (s) [mean]                      | Gait        | 1 minute walk | Smartphone      | clinic | Controls | 34 | 0.4 (0.04)  | 0.4 (0.03)  | -0.07 | (-0.3, 0.4)  |
| Swing (s) [mean]                      | Gait        | 1 minute walk | Smartphone      | clinic | PD       | 27 | 0.4 (0.04)  | 0.4 (0.04)  | -0.1  | (-0.5, 0.3)  |
| Swing (s) [mean]                      | Gait        | 1 minute walk | Smartphone      | home   | Controls | 18 | 0.4 (0.04)  | 0.4 (0.03)  | 0.2   | (-0.7, 0.01) |
| Swing (s) [mean]                      | Gait        | 1 minute walk | Smartphone      | home   | PD       | 19 | 0.4 (0.04)  | 0.4 (0.05)  | 0.1   | (-0.2, 0.9)  |
| Swing (s) asymmetry                   | Gait        | 1 minute walk | Smartphone      | clinic | Controls | 33 | 3.5 (2.9)   | 5.4 (4.1)   | 0.4   | (-0.8, 0.02) |
| Swing (s) asymmetry                   | Gait        | 1 minute walk | Smartphone      | clinic | PD       | 25 | 4.1 (2.5)   | 5.0 (3.6)   | 0.4   | (0.04, 0.8)  |
| Swing (s) asymmetry                   | Gait        | 1 minute walk | Smartphone      | home   | Controls | 18 | 5.3 (4.0)   | 6.1 (5.6)   | 0.2   | (-0.3, 0.3)  |
| Swing (s) asymmetry                   | Gait        | 1 minute walk | Smartphone      | home   | PD       | 17 | 5.0 (2.4)   | 4.8 (3.6)   | -0.05 | (-0.4, 0.6)  |
| Terminal double support (s) [mean]    | Gait        | 1 minute walk | Smartphone      | clinic | Controls | 34 | 0.1 (0.01)  | 0.1 (0.01)  | -0.1  | (-0.1, 0.6)  |
| Terminal double support (s) [mean]    | Gait        | 1 minute walk | Smartphone      | clinic | PD       | 27 | 0.1 (0.01)  | 0.1 (0.01)  | -0.08 | (-0.5, 0.2)  |
| Terminal double support (s) [mean]    | Gait        | 1 minute walk | Smartphone      | home   | Controls | 18 | 0.1 (0.01)  | 0.1 (0.01)  | 0.1   | (-0.6, 0.2)  |
| Terminal double support (s) [mean]    | Gait        | 1 minute walk | Smartphone      | home   | PD       | 19 | 0.1 (0.01)  | 0.1 (0.01)  | -0.09 | (-0.3, 0.9)  |
| Terminal double support (s) asymmetry | Gait        | 1 minute walk | Smartphone      | clinic | Controls | 32 | 4.7 (2.6)   | 5.1 (3.7)   | 0.1   | (-0.3, 0.3)  |
| Terminal double support (s) asymmetry | Gait        | 1 minute walk | Smartphone      | clinic | PD       | 25 | 5.3 (5.4)   | 6.3 (5.1)   | 0.3   | (-0.2, 0.5)  |
| Terminal double support (s) asymmetry | Gait        | 1 minute walk | Smartphone      | home   | Controls | 17 | 6.3 (4.3)   | 6.4 (5.3)   | 0.01  | (-0.4, 0.2)  |
| Terminal double support (s) asymmetry | Gait        | 1 minute walk | Smartphone      | home   | PD       | 16 | 6.0 (3.7)   | 6.8 (3.9)   | 0.2   | (-0.6, 0.5)  |
| Arm swing (degrees) [mean]            | Gait        | 1 minute walk | Smartwatch      | clinic | Controls | 35 | 47.8 (19.2) | 48.4 (20.8) | 0.06  | (-0.3, 0.3)  |
| Arm swing (degrees) [mean]            | Gait        | 1 minute walk | Smartwatch      | clinic | PD       | 27 | 25.1 (13.7) | 21.7 (14.6) | -0.3  | (-0.3, 0.4)  |
| Arm swing (degrees) [mean]            | Gait        | 1 minute walk | Smartwatch      | home   | Controls | 19 | 44.6 (14.7) | 43.0 (18.5) | -0.1  | (-0.5, 0.5)  |
| Arm swing (degrees) [mean]            | Gait        | 1 minute walk | Smartwatch      | home   | PD       | 19 | 21.7 (12.1) | 20.3 (13.9) | -0.2  | (-0.6, 0.3)  |
| MDS - UPDRS part I total              | MDS - UPDRS |               | Clinical rating | clinic | Controls | 45 | 3.0 (2.6)   | 3.1 (3.6)   | 0.04  | (-0.4, 0.3)  |
| MDS - UPDRS part I total              | MDS - UPDRS |               | Clinical rating | clinic | PD       | 47 | 5.6 (3.8)   | 5.9 (4.2)   | 0.08  | (-0.3, 0.3)  |
| MDS - UPDRS part I + II + III total   | MDS - UPDRS |               | Clinical rating | clinic | Controls | 45 | 6.1 (5.4)   | 6.5 (5.1)   | 0.09  | (-0.5, 0.3)  |
| MDS - UPDRS part I + II + III total   | MDS - UPDRS |               | Clinical rating | clinic | PD       | 47 | 33.7 (12.6) | 40.6 (14.3) | 0.6   | (-0.2, 0.4)  |
| MDS - UPDRS part II total             | MDS - UPDRS |               | Clinical rating | clinic | Controls | 45 | 0.5 (1.1)   | 0.4 (1.1)   | -0.03 | (-0.3, 0.4)  |
| MDS - UPDRS part II total             | MDS - UPDRS |               | Clinical rating | clinic | PD       | 47 | 5.4 (3.8)   | 7.4 (4.8)   | 0.6   | (-0.4, 0.2)  |
| MDS - UPDRS part III total            | MDS - UPDRS |               | Clinical rating | clinic | Controls | 45 | 2.6 (3.6)   | 3.0 (3.3)   | 0.1   | (-0.5, 0.3)  |
| MDS - UPDRS part III total            | MDS - UPDRS |               | Clinical rating | clinic | PD       | 47 | 22.7 (10.7) | 27.3 (11.4) | 0.6   | (-0.2, 0.4)  |
| Rater evaluation of speech            | Speech      | item 3.01     | Clinical rating | clinic | Controls | 45 | 0.07 (0.3)  | 0.09 (0.3)  | 0.09  | (-0.3, 0.3)  |
| Rater evaluation of speech            | Speech      | item 3.01     | Clinical rating | clinic | PD       | 47 | 0.4 (0.5)   | 0.7 (0.5)   | 0.6   | (-0.2, 0.3)  |

|                                          |        |                    |                          |        |          |    |              |              |        |               |
|------------------------------------------|--------|--------------------|--------------------------|--------|----------|----|--------------|--------------|--------|---------------|
| Self-reported problem with speech        | Speech | item 2.01          | Self reported evaluation | clinic | Controls | 46 | 0 (0)        | 0 (0)        |        |               |
| Self-reported problem with speech        | Speech | item 2.01          | Self reported evaluation | clinic | PD       | 47 | 0.4 (0.7)    | 0.5 (0.7)    | 0.2    | (0.1, 0.4)    |
| Cepstral peak prominence, zscored        | Speech | Phonation          | Smartphone               | clinic | Controls | 25 | -0.009 (1.0) | 0.05 (1.0)   | 0.07   | (-0.08, 0.5)  |
| Cepstral peak prominence, zscored        | Speech | Phonation          | Smartphone               | clinic | PD       | 34 | -0.1 (1.2)   | -0.3 (1.4)   | -0.1   | (-0.4, 0.4)   |
| Cepstral peak prominence, zscored        | Speech | Phonation          | Smartphone               | home   | Controls | 26 | 0.09 (0.9)   | 0.3 (0.9)    | 0.2    | (-0.3, 0.4)   |
| Cepstral peak prominence, zscored        | Speech | phonation          | Smartphone               | home   | PD       | 31 | -0.2 (1.1)   | -0.4 (1.0)   | -0.2   | (-0.2, 0.8)   |
| Log(pause time), zscored                 | Speech | Reading            | Smartphone               | clinic | Controls | 25 | 0.02 (1.0)   | 0.1 (1.0)    | 0.1    | (-0.2, 0.4)   |
| Log(pause time), zscored                 | Speech | Reading            | Smartphone               | clinic | PD       | 34 | 0.3 (1.2)    | 0.5 (1.1)    | 0.2    | (-0.2, 0.7)   |
| Log(pause time), zscored                 | Speech | Reading            | Smartphone               | home   | Controls | 26 | -0.3 (0.9)   | 0.04 (0.8)   | 0.4    | (-0.009, 0.6) |
| MFCC2, zscored                           | Speech | Reading            | Smartphone               | home   | PD       | 31 | -0.1 (1.0)   | 0.2 (1.2)    | 0.3    | (-0.06, 1.0)  |
| MFCC2, zscored                           | Speech | Phonation          | Smartphone               | clinic | Controls | 25 | 0.2 (0.9)    | 0.04 (0.8)   | -0.2   | (-0.3, 0.3)   |
| MFCC2, zscored                           | Speech | Phonation          | Smartphone               | clinic | PD       | 34 | -0.3 (1.0)   | -0.2 (1.1)   | 0.04   | (-0.6, 0.2)   |
| MFCC2, zscored                           | Speech | Phonation          | Smartphone               | home   | Controls | 26 | 0.07 (1.3)   | -0.2 (1.1)   | -0.2   | (-0.3, 0.3)   |
| MFCC2, zscored                           | Speech | Phonation          | Smartphone               | home   | PD       | 31 | -0.3 (1.0)   | -0.4 (1.6)   | -0.09  | (-0.6, 0.3)   |
| Monopitch (semitone range), zscored      | Speech | Reading            | Smartphone               | clinic | Controls | 25 | -0.2 (1.0)   | 0.2 (1.0)    | 0.5    | (-0.08, 0.4)  |
| Monopitch (semitone range), zscored      | Speech | Reading            | Smartphone               | clinic | PD       | 34 | -0.8 (0.9)   | -0.6 (0.9)   | 0.3    | (0.1, 0.9)    |
| Monopitch (semitone range), zscored      | Speech | Reading            | Smartphone               | home   | Controls | 26 | 0.06 (1.1)   | 0.2 (0.9)    | 0.1    | (-0.01, 0.5)  |
| Monopitch (semitone range), zscored      | Speech | Reading            | Smartphone               | home   | PD       | 31 | -0.7 (0.9)   | -0.2 (1.1)   | 0.5    | (-0.3, 0.5)   |
| Speech composite                         | Speech | Reading, phonation | Smartphone               | clinic | Controls | 25 | 0.03 (2.0)   | -0.1 (1.8)   | -0.09  | (-0.3, 0.1)   |
| Speech composite                         | Speech | Reading, phonation | Smartphone               | clinic | PD       | 34 | 1.5 (2.5)    | 1.7 (2.0)    | 0.05   | (-0.5, 0.3)   |
| Speech composite                         | Speech | Reading, phonation | Smartphone               | home   | Controls | 26 | -0.6 (2.0)   | -0.2 (1.5)   | 0.1    | (-0.2, 0.3)   |
| Speech composite                         | Speech | Reading, phonation | Smartphone               | home   | PD       | 31 | 1.1 (1.8)    | 1.1 (2.0)    | -0.004 | (-0.2, 0.6)   |
| Rater evaluation of constancy of tremor  | Tremor | item 3.18          | Clinical rating          | clinic | Controls | 45 | 0 (0)        | 0.02 (0.1)   | 0.1    | (-0.6, 0.2)   |
| Rater evaluation of constancy of tremor  | Tremor | item 3.18          | Clinical rating          | clinic | PD       | 47 | 1.7 (1.4)    | 2.1 (1.6)    | 0.5    | (0.1, 0.3)    |
| Self-reported problems with tremor       | Tremor | item 2.10          | Self reported evaluation | clinic | Controls | 48 | 0 (0)        | 0 (0)        |        |               |
| Self-reported problems with tremor       | Tremor | item 2.10          | Self reported evaluation | clinic | PD       | 47 | 1.2 (0.7)    | 1.4 (0.8)    | 0.4    | (0.2, 0.5)    |
| Tremor (%)                               | Tremor | Passive            | Smartwatch               | home   | Controls | 10 | 0.8 (0.6)    | 1.1 (1.3)    | 0.3    | (-0.2, 0.4)   |
| Tremor (%)                               | Tremor | Passive            | Smartwatch               | home   | PD       | 34 | 23.5 (18.2)  | 30.2 (21.3)  | 0.4    | (-0.4, 0.8)   |
| Turns angle (degrees) [mean]             | Turns  | 2 minute walk      | Research accel.          | clinic | Controls | 45 | 182.5 (7.8)  | 182.5 (4.6)  | 0.002  | (-0.3, 0.3)   |
| Turns angle (degrees) [mean]             | Turns  | 2 minute walk      | Research accel.          | clinic | PD       | 47 | 178.2 (6.4)  | 176.6 (8.2)  | -0.2   | (-0.2, 0.4)   |
| Turns duration (s) [mean]                | Turns  | 2 minute walk      | Research accel.          | clinic | Controls | 45 | 2.1 (0.4)    | 2.1 (0.4)    | -0.07  | (-0.3, 0.6)   |
| Turns duration (s) [mean]                | Turns  | 2 minute walk      | Research accel.          | clinic | PD       | 47 | 2.3 (0.3)    | 2.4 (0.4)    | 0.4    | (-0.4, 0.2)   |
| Turns steps in.turn_ [mean]              | Turns  | 2 minute walk      | Research accel.          | clinic | Controls | 44 | 3.7 (0.8)    | 3.6 (0.7)    | -0.2   | (-0.1, 0.6)   |
| Turns steps in.turn_ [mean]              | Turns  | 2 minute walk      | Research accel.          | clinic | PD       | 47 | 3.9 (0.6)    | 4.0 (0.7)    | 0.4    | (-0.5, 0.1)   |
| Turns turn velocity (degrees) (s) [mean] | Turns  | 2 minute walk      | Research accel.          | clinic | Controls | 45 | 202.3 (37.4) | 206.5 (47.1) | 0.1    | (-0.6, 0.2)   |
| Turns turn velocity (degrees) (s) [mean] | Turns  | 2 minute walk      | Research accel.          | clinic | PD       | 47 | 166.4 (30.0) | 157.8 (31.7) | -0.3   | (-0.2, 0.4)   |
| Turns angle (degrees) [mean]             | Turns  | Dual task          | Research accel.          | clinic | Controls | 46 | 179.6 (6.3)  | 181.3 (6.9)  | 0.2    | (-0.5, 0.2)   |
| Turns angle (degrees) [mean]             | Turns  | Dual task          | Research accel.          | clinic | PD       | 46 | 175.9 (9.7)  | 176.5 (7.6)  | 0.08   | (-0.08, 0.6)  |
| Turns duration (s) [mean]                | Turns  | Dual task          | Research accel.          | clinic | Controls | 46 | 2.1 (0.3)    | 2.2 (0.3)    | 0.1    | (-0.4, 0.3)   |
| Turns duration (s) [mean]                | Turns  | Dual task          | Research accel.          | clinic | PD       | 46 | 2.4 (0.4)    | 2.5 (0.4)    | 0.2    | (-0.2, 0.4)   |
| Turns steps in turn [mean]               | Turns  | Dual task          | Research accel.          | clinic | Controls | 44 | 3.6 (0.7)    | 3.5 (0.8)    | -0.07  | (-0.3, 0.5)   |
| Turns steps in turn [mean]               | Turns  | Dual task          | Research accel.          | clinic | PD       | 46 | 3.9 (0.7)    | 4.1 (0.7)    | 0.3    | (-0.3, 0.2)   |
| Turns turn velocity (degrees) (s) [mean] | Turns  | Dual task          | Research accel.          | clinic | Controls | 46 | 192.8 (35.6) | 197.9 (41.7) | 0.2    | (-0.6, 0.2)   |
| Turns turn velocity (degrees) (s) [mean] | Turns  | Dual task          | Research accel.          | clinic | PD       | 46 | 158.5 (31.0) | 150.6 (30.0) | -0.3   | (-0.2, 0.4)   |
| Turn duration (s) [mean]                 | Turns  | 1 minute walk      | Smartphone               | clinic | Controls | 41 | 2.1 (0.5)    | 2.1 (0.4)    | 0.01   | (-0.3, 0.4)   |
| Turn duration (s) [mean]                 | Turns  | 1 minute walk      | Smartphone               | clinic | PD       | 38 | 2.3 (0.5)    | 2.4 (0.5)    | 0.2    | (-0.3, 0.3)   |
| Turn duration (s) [mean]                 | Turns  | 1 minute walk      | Smartphone               | home   | Controls | 30 | 2.3 (0.5)    | 2.1 (0.6)    | -0.3   | (-0.4, 0.3)   |
| Turn duration (s) [mean]                 | Turns  | 1 minute walk      | Smartphone               | home   | PD       | 27 | 2.2 (0.5)    | 2.4 (0.5)    | 0.4    | (-0.7, 0.06)  |

Supplementary Table 4: Sample Size per arm by treatment effect and standardized change (assuming power = 0.8 and 1-sided  $\alpha = 0.025$ )

| Standardized Change | Treatment Effect |       |      |      |
|---------------------|------------------|-------|------|------|
|                     | 20%              | 30%   | 40%  | 50%  |
| 0.1                 | 39246            | 17443 | 9813 | 6281 |
| 0.2                 | 9813             | 4362  | 2454 | 1571 |
| 0.3                 | 4362             | 1939  | 1092 | 699  |
| 0.4                 | 2454             | 1092  | 615  | 394  |
| 0.5                 | 1571             | 699   | 394  | 253  |
| 0.6                 | 1092             | 486   | 274  | 176  |
| 0.7                 | 802              | 357   | 202  | 130  |
| 0.8                 | 615              | 274   | 155  | 100  |
| 0.9                 | 486              | 217   | 123  | 79   |
| 1.0                 | 394              | 176   | 100  | 64   |
| 1.1                 | 326              | 146   | 83   | 53   |
| 1.2                 | 274              | 123   | 70   | 45   |
| 1.3                 | 234              | 105   | 60   | 39   |
| 1.4                 | 202              | 90    | 52   | 34   |
| 1.5                 | 176              | 79    | 45   | 29   |
| 1.6                 | 155              | 70    | 40   | 26   |
| 1.7                 | 137              | 62    | 35   | 23   |
| 1.8                 | 123              | 55    | 32   | 21   |
| 1.9                 | 110              | 50    | 29   | 19   |
| 2.0                 | 100              | 45    | 26   | 17   |
